# Supplementary material
Source: MDPI journal article supplement (https://www.mdpi.com/2227-7390/8/12/2235)
Supplement: s1 [file s1]

Archive with 55 entries (40 files):
- supplementary/
- supplementary/SM I (Weights of the 4 Real Organizational Networks).pdf
- supplementary/SM II (Figures of AD, CAD, SLD, BD)/
- supplementary/SM II (Figures of AD, CAD, SLD, BD)/10% vs 10%/
- supplementary/SM II (Figures of AD, CAD, SLD, BD)/10% vs 10%/AD (10% vs 10%).png
- supplementary/SM II (Figures of AD, CAD, SLD, BD)/10% vs 10%/BD (10% vs 10%).png
- supplementary/SM II (Figures of AD, CAD, SLD, BD)/10% vs 10%/CAD (10% vs 10%).png
- supplementary/SM II (Figures of AD, CAD, SLD, BD)/10% vs 10%/SLD (10% vs 10%).png
- supplementary/SM II (Figures of AD, CAD, SLD, BD)/15% vs 15%/
- supplementary/SM II (Figures of AD, CAD, SLD, BD)/15% vs 15%/AD (15% vs 15%).png
- supplementary/SM II (Figures of AD, CAD, SLD, BD)/15% vs 15%/BD (15% vs 15%).png
- supplementary/SM II (Figures of AD, CAD, SLD, BD)/15% vs 15%/CAD (15% vs 15%).png
- supplementary/SM II (Figures of AD, CAD, SLD, BD)/15% vs 15%/SLD (15% vs 15%).png
- supplementary/SM II (Figures of AD, CAD, SLD, BD)/5% vs 5%/
- supplementary/SM II (Figures of AD, CAD, SLD, BD)/5% vs 5%/AD (5% vs 5%).png
- supplementary/SM II (Figures of AD, CAD, SLD, BD)/5% vs 5%/BD (5% vs 5%).png
- supplementary/SM II (Figures of AD, CAD, SLD, BD)/5% vs 5%/CAD (5% vs 5%).png
- supplementary/SM II (Figures of AD, CAD, SLD, BD)/5% vs 5%/SLD (5% vs 5%).png
- supplementary/SM III (Spreadsheets of FPL, FNL, MB, MBT, BT)/
- supplementary/SM III (Spreadsheets of FPL, FNL, MB, MBT, BT)/Consulting Company (CC).xlsx
- supplementary/SM III (Spreadsheets of FPL, FNL, MB, MBT, BT)/IT Department (IT).xlsx
- supplementary/SM III (Spreadsheets of FPL, FNL, MB, MBT, BT)/Law Firm (LF).xlsx
- supplementary/SM III (Spreadsheets of FPL, FNL, MB, MBT, BT)/Manufacturing Company (MC).xlsx
- supplementary/SM IV (Figures of FPL, FNL, MB, MBT, BT)/
- supplementary/SM IV (Figures of FPL, FNL, MB, MBT, BT)/BT/
- supplementary/SM IV (Figures of FPL, FNL, MB, MBT, BT)/BT/BT, with respect to 5% Promoters vs 5% Adversaries (Figure SM IV.13).png
- supplementary/SM IV (Figures of FPL, FNL, MB, MBT, BT)/BT/BT, with respect to Learning Rate of Weights = 10% (Figure SM IV.15).png
- supplementary/SM IV (Figures of FPL, FNL, MB, MBT, BT)/BT/BT, with respect to LOW Centrality Influentials (Figure SM IV.14).png
- supplementary/SM IV (Figures of FPL, FNL, MB, MBT, BT)/FNL/
- supplementary/SM IV (Figures of FPL, FNL, MB, MBT, BT)/FNL/FNL, with respect to 5% Promoters vs 5% Adversaries (Figure SM IV.4).png
- supplementary/SM IV (Figures of FPL, FNL, MB, MBT, BT)/FNL/FNL, with respect to Learning Rate of Weights = 10% (Figure SM IV.6).png
- supplementary/SM IV (Figures of FPL, FNL, MB, MBT, BT)/FNL/FNL, with respect to LOW Centrality Influentials (Figure SM IV.5).png
- supplementary/SM IV (Figures of FPL, FNL, MB, MBT, BT)/FPL/
- supplementary/SM IV (Figures of FPL, FNL, MB, MBT, BT)/FPL/FPL, with respect to 5% Promoters vs 5% Adversaries (Figure SM IV.1).png
- supplementary/SM IV (Figures of FPL, FNL, MB, MBT, BT)/FPL/FPL, with respect to Learning Rate of Weights = 10% (Figure SM IV.3).png
- supplementary/SM IV (Figures of FPL, FNL, MB, MBT, BT)/FPL/FPL, with respect to LOW Centrality Influentials (Figure SM IV.2).png
- supplementary/SM IV (Figures of FPL, FNL, MB, MBT, BT)/MB/
- supplementary/SM IV (Figures of FPL, FNL, MB, MBT, BT)/MBT/
- supplementary/SM IV (Figures of FPL, FNL, MB, MBT, BT)/MBT/MBT, with respect to 5% Promoters vs 5% Adversaries (Figure SM IV.10).png
- supplementary/SM IV (Figures of FPL, FNL, MB, MBT, BT)/MBT/MBT, with respect to Learning Rate of Weights = 10% (Figure SM IV.12).png
- supplementary/SM IV (Figures of FPL, FNL, MB, MBT, BT)/MBT/MBT, with respect to LOW Centrality Influentials (Figure SM IV.11).png
- supplementary/SM IV (Figures of FPL, FNL, MB, MBT, BT)/MB/MB, with respect to 5% Promoters vs 5% Adversaries (Figure SM IV.7).png
- supplementary/SM IV (Figures of FPL, FNL, MB, MBT, BT)/MB/MB, with respect to Learning Rate of Weights = 10% (Figure SM IV.9).png
- supplementary/SM IV (Figures of FPL, FNL, MB, MBT, BT)/MB/MB, with respect to LOW Centrality Influentials (Figure SM IV.8).png
- supplementary/SM V (Figures for 20% vs 20% and 25% vs 25%)/
- supplementary/SM V (Figures for 20% vs 20% and 25% vs 25%)/20% vs 20%/
- supplementary/SM V (Figures for 20% vs 20% and 25% vs 25%)/20% vs 20%/AD (20% vs 20%).png
- supplementary/SM V (Figures for 20% vs 20% and 25% vs 25%)/20% vs 20%/BD (20% vs 20%).png
- supplementary/SM V (Figures for 20% vs 20% and 25% vs 25%)/20% vs 20%/CAD (20% vs 20%).png
- supplementary/SM V (Figures for 20% vs 20% and 25% vs 25%)/20% vs 20%/SLD (20% vs 20%).png
- supplementary/SM V (Figures for 20% vs 20% and 25% vs 25%)/25% vs 25%/
- supplementary/SM V (Figures for 20% vs 20% and 25% vs 25%)/25% vs 25%/AD (25% vs 25%).png
- supplementary/SM V (Figures for 20% vs 20% and 25% vs 25%)/25% vs 25%/BD (25% vs 25%).png
- supplementary/SM V (Figures for 20% vs 20% and 25% vs 25%)/25% vs 25%/CAD (25% vs 25%).png
- supplementary/SM V (Figures for 20% vs 20% and 25% vs 25%)/25% vs 25%/SLD (25% vs 25%).png
