# Supplementary material
Source: MDPI journal article supplement (https://www.mdpi.com/2227-7390/8/12/2235)
Supplement: s1 [file s1 › supplementary/SM III (Spreadsheets of FPL, FNL, MB, MBT, BT)/Consulting Company (CC).xlsx]

## Sheet: Final Positive Links (FPL)
		Average FPL
		5% Promoters vs 5% Adversaries	10% Promoters vs 10% Adversaries	15% Promoters vs 15% Adversaries
Learning Rate of Weights = 10%	LOW Centrality Influentials	86.46	78.06	69.19
	MEDIUM Centrality Influentials	85.29	75.16	65.78
	HIGH Centrality Influentials	81.87	70.52	62.98
Learning Rate of Weights = 20%	LOW Centrality Influentials	87.27	78.29	69.08
	MEDIUM Centrality Influentials	85.1	75.2	66.39
	HIGH Centrality Influentials	82.35	71.27	62.26
Learning Rate of Weights = 40%	LOW Centrality Influentials	86.82	77.66	68.42
	MEDIUM Centrality Influentials	85.35	75.56	66.72
	HIGH Centrality Influentials	82.4	71.01	62.75
		Decrease (%) of the Average FPL, with respect to LOW Centrality Influentials
		5% Promoters vs 5% Adversaries	10% Promoters vs 10% Adversaries	15% Promoters vs 15% Adversaries
Learning Rate of Weights = 10%	MEDIUM Centrality Influentials	0.0135323	0.0371509	0.0492846
	HIGH Centrality Influentials	0.0530881	0.0965924	0.0897529
Learning Rate of Weights = 20%	MEDIUM Centrality Influentials	0.0248654	0.0394686	0.0389404
	HIGH Centrality Influentials	0.0563768	0.0896666	0.0987261
Learning Rate of Weights = 40%	MEDIUM Centrality Influentials	0.0169316	0.0270409	0.0248465
	HIGH Centrality Influentials	0.0509099	0.0856297	0.0828705
		Decrease (%) of the Average FPL, with respect to Learning Rate of Weights = 10%
		5% Promoters vs 5% Adversaries	10% Promoters vs 10% Adversaries	15% Promoters vs 15% Adversaries
LOW Centrality Influentials	Learning Rate of Weights = 20%	-0.00936849	-0.00294645	0.00158983
	Learning Rate of Weights = 40%	-0.00416378	0.00512426	0.0111288
MEDIUM Centrality Influentials	Learning Rate of Weights = 20%	0.00222769	-0.000532198	-0.00927334
	Learning Rate of Weights = 40%	-0.000703482	-0.00532198	-0.0142901
HIGH Centrality Influentials	Learning Rate of Weights = 20%	-0.00586295	-0.0106353	0.0114322
	Learning Rate of Weights = 40%	-0.00647368	-0.00694838	0.00365195
		Decrease (%) of the Average FPL, with respect to 5% Promoters vs 5% Adversaries
		10% Promoters vs 10% Adversaries	15% Promoters vs 15% Adversaries
Learning Rate of Weights = 10%	LOW Centrality Influentials	0.0971548	0.199746
	MEDIUM Centrality Influentials	0.118771	0.228749
	HIGH Centrality Influentials	0.138634	0.230732
Learning Rate of Weights = 20%	LOW Centrality Influentials	0.102899	0.208434
	MEDIUM Centrality Influentials	0.116334	0.219859
	HIGH Centrality Influentials	0.134548	0.243959
Learning Rate of Weights = 40%	LOW Centrality Influentials	0.105506	0.211933
	MEDIUM Centrality Influentials	0.114704	0.218278
	HIGH Centrality Influentials	0.138228	0.238471

## Sheet: Final Negative Links (FNL)
		Average FNL
		5% Promoters vs 5% Adversaries	10% Promoters vs 10% Adversaries	15% Promoters vs 15% Adversaries
Learning Rate of Weights = 10%	LOW Centrality Influentials	13.54	21.94	30.81
	MEDIUM Centrality Influentials	14.71	24.84	34.22
	HIGH Centrality Influentials	18.13	29.48	37.02
Learning Rate of Weights = 20%	LOW Centrality Influentials	12.73	21.71	30.92
	MEDIUM Centrality Influentials	14.9	24.8	33.61
	HIGH Centrality Influentials	17.65	28.73	37.74
Learning Rate of Weights = 40%	LOW Centrality Influentials	13.18	22.34	31.58
	MEDIUM Centrality Influentials	14.65	24.44	33.28
	HIGH Centrality Influentials	17.6	28.99	37.25
		Increase (%) of the Average FNL, with respect to LOW Centrality Influentials
		5% Promoters vs 5% Adversaries	10% Promoters vs 10% Adversaries	15% Promoters vs 15% Adversaries
Learning Rate of Weights = 10%	MEDIUM Centrality Influentials	0.0864106	0.132179	0.110678
	HIGH Centrality Influentials	0.338996	0.343665	0.201558
Learning Rate of Weights = 20%	MEDIUM Centrality Influentials	0.170463	0.142331	0.0869987
	HIGH Centrality Influentials	0.386489	0.323353	0.220569
Learning Rate of Weights = 40%	MEDIUM Centrality Influentials	0.111533	0.0940018	0.0538315
	HIGH Centrality Influentials	0.335357	0.297672	0.179544
		Decrease (%) of the Average FNL, with respect to Learning Rate of Weights = 10%
		5% Promoters vs 5% Adversaries	10% Promoters vs 10% Adversaries	15% Promoters vs 15% Adversaries
LOW Centrality Influentials	Learning Rate of Weights = 20%	0.0598227	0.0104831	-0.00357027
	Learning Rate of Weights = 40%	0.0265879	-0.0182315	-0.0249919
MEDIUM Centrality Influentials	Learning Rate of Weights = 20%	-0.0129164	0.00161031	0.0178258
	Learning Rate of Weights = 40%	0.00407886	0.0161031	0.0274693
HIGH Centrality Influentials	Learning Rate of Weights = 20%	0.0264755	0.025441	-0.0194489
	Learning Rate of Weights = 40%	0.0292333	0.0166214	-0.00621286
		Increase (%) of the Average FNL, with respect to 5% Promoters vs 5% Adversaries
		10% Promoters vs 10% Adversaries	15% Promoters vs 15% Adversaries
Learning Rate of Weights = 10%	LOW Centrality Influentials	0.620384	1.27548
	MEDIUM Centrality Influentials	0.688647	1.32631
	HIGH Centrality Influentials	0.626034	1.04192
Learning Rate of Weights = 20%	LOW Centrality Influentials	0.70542	1.42891
	MEDIUM Centrality Influentials	0.66443	1.2557
	HIGH Centrality Influentials	0.627762	1.13824
Learning Rate of Weights = 40%	LOW Centrality Influentials	0.694992	1.39605
	MEDIUM Centrality Influentials	0.668259	1.27167
	HIGH Centrality Influentials	0.647159	1.11648

## Sheet: Minimal Balance (MB)
		Average MB
		5% Promoters vs 5% Adversaries	10% Promoters vs 10% Adversaries	15% Promoters vs 15% Adversaries
Learning Rate of Weights = 10%	LOW Centrality Influentials	84.4	76.07	68.01
	MEDIUM Centrality Influentials	83.14	73.82	66.1
	HIGH Centrality Influentials	76.6	67.86	63.68
Learning Rate of Weights = 20%	LOW Centrality Influentials	87.41	77.98	70.85
	MEDIUM Centrality Influentials	84.77	75.19	67.78
	HIGH Centrality Influentials	79.93	70.01	64.49
Learning Rate of Weights = 40%	LOW Centrality Influentials	88.79	80.55	73.05
	MEDIUM Centrality Influentials	86.74	78.23	71.38
	HIGH Centrality Influentials	81.99	73.18	67.05
		Decrease (%) of the Average MB, with respect to LOW Centrality Influentials
		5% Promoters vs 5% Adversaries	10% Promoters vs 10% Adversaries	15% Promoters vs 15% Adversaries
Learning Rate of Weights = 10%	MEDIUM Centrality Influentials	0.0149289	0.029578	0.0280841
	HIGH Centrality Influentials	0.0924171	0.107927	0.0636671
Learning Rate of Weights = 20%	MEDIUM Centrality Influentials	0.0302025	0.0357784	0.043331
	HIGH Centrality Influentials	0.0855737	0.102206	0.0897671
Learning Rate of Weights = 40%	MEDIUM Centrality Influentials	0.0230882	0.028802	0.0228611
	HIGH Centrality Influentials	0.0765852	0.091496	0.0821355
		Increase (%) of the Average MB, with respect to Learning Rate of Weights = 10%
		5% Promoters vs 5% Adversaries	10% Promoters vs 10% Adversaries	15% Promoters vs 15% Adversaries
LOW Centrality Influentials	Learning Rate of Weights = 20%	0.0356635	0.0251085	0.0417586
	Learning Rate of Weights = 40%	0.0520142	0.0588931	0.0741067
MEDIUM Centrality Influentials	Learning Rate of Weights = 20%	0.0196055	0.0185587	0.025416
	Learning Rate of Weights = 40%	0.0433005	0.0597399	0.079879
HIGH Centrality Influentials	Learning Rate of Weights = 20%	0.0434726	0.0316829	0.0127198
	Learning Rate of Weights = 40%	0.0703655	0.0783967	0.0529209
		Decrease (%) of the Average MB, with respect to 5% Promoters vs 5% Adversaries
		10% Promoters vs 10% Adversaries	15% Promoters vs 15% Adversaries
Learning Rate of Weights = 10%	LOW Centrality Influentials	0.0986967	0.194194
	MEDIUM Centrality Influentials	0.1121	0.204955
	HIGH Centrality Influentials	0.114099	0.168668
Learning Rate of Weights = 20%	LOW Centrality Influentials	0.107882	0.189452
	MEDIUM Centrality Influentials	0.113012	0.200425
	HIGH Centrality Influentials	0.124109	0.193169
Learning Rate of Weights = 40%	LOW Centrality Influentials	0.0928032	0.177272
	MEDIUM Centrality Influentials	0.0981093	0.177081
	HIGH Centrality Influentials	0.107452	0.182217

## Sheet: Minimal Balance Time (MBT)
		Average MBT
		5% Promoters vs 5% Adversaries	10% Promoters vs 10% Adversaries	15% Promoters vs 15% Adversaries
Learning Rate of Weights = 10%	LOW Centrality Influentials	22.01	18.82	17.98
	MEDIUM Centrality Influentials	25.48	18.35	17.57
	HIGH Centrality Influentials	21.59	17.45	15.13
Learning Rate of Weights = 20%	LOW Centrality Influentials	25.59	18.66	17.76
	MEDIUM Centrality Influentials	24.92	18.66	16.51
	HIGH Centrality Influentials	20.93	17.99	15.51
Learning Rate of Weights = 40%	LOW Centrality Influentials	29.61	22.4	18.54
	MEDIUM Centrality Influentials	28.77	21.26	18.56
	HIGH Centrality Influentials	26.64	19.95	15.78
		Decrease (%) of the Average MBT, with respect to LOW Centrality Influentials
		5% Promoters vs 5% Adversaries	10% Promoters vs 10% Adversaries	15% Promoters vs 15% Adversaries
Learning Rate of Weights = 10%	MEDIUM Centrality Influentials	-0.157656	0.0249734	0.0228031
	HIGH Centrality Influentials	0.0190822	0.0727949	0.158509
Learning Rate of Weights = 20%	MEDIUM Centrality Influentials	0.0261821	0	0.0703829
	HIGH Centrality Influentials	0.182102	0.0359057	0.126689
Learning Rate of Weights = 40%	MEDIUM Centrality Influentials	0.0283688	0.0508929	-0.00107875
	HIGH Centrality Influentials	0.100304	0.109375	0.148867
		Increase (%) of the Average MBT, with respect to Learning Rate of Weights = 10%
		5% Promoters vs 5% Adversaries	10% Promoters vs 10% Adversaries	15% Promoters vs 15% Adversaries
LOW Centrality Influentials	Learning Rate of Weights = 20%	0.162653	-0.00850159	-0.0122358
	Learning Rate of Weights = 40%	0.345298	0.190223	0.0311457
MEDIUM Centrality Influentials	Learning Rate of Weights = 20%	-0.021978	0.0168937	-0.0603301
	Learning Rate of Weights = 40%	0.129121	0.158583	0.056346
HIGH Centrality Influentials	Learning Rate of Weights = 20%	-0.0305697	0.0309456	0.0251157
	Learning Rate of Weights = 40%	0.233905	0.143266	0.042961
		Decrease (%) of the Average MBT, with respect to 5% Promoters vs 5% Adversaries
		10% Promoters vs 10% Adversaries	15% Promoters vs 15% Adversaries
Learning Rate of Weights = 10%	LOW Centrality Influentials	0.144934	0.183099
	MEDIUM Centrality Influentials	0.279827	0.31044
	HIGH Centrality Influentials	0.191755	0.299213
Learning Rate of Weights = 20%	LOW Centrality Influentials	0.270809	0.305979
	MEDIUM Centrality Influentials	0.251204	0.33748
	HIGH Centrality Influentials	0.140468	0.258958
Learning Rate of Weights = 40%	LOW Centrality Influentials	0.243499	0.37386
	MEDIUM Centrality Influentials	0.261036	0.354884
	HIGH Centrality Influentials	0.251126	0.407658

## Sheet: Balance Time (BT)
		Average BT
		5% Promoters vs 5% Adversaries	10% Promoters vs 10% Adversaries	15% Promoters vs 15% Adversaries
Learning Rate of Weights = 10%	LOW Centrality Influentials	150.68	163.69	150.47
	MEDIUM Centrality Influentials	159.72	169.74	148.98
	HIGH Centrality Influentials	173.41	158.78	121.87
Learning Rate of Weights = 20%	LOW Centrality Influentials	114.65	136.53	129.32
	MEDIUM Centrality Influentials	126.84	153.06	121.76
	HIGH Centrality Influentials	136.61	138.33	117.71
Learning Rate of Weights = 40%	LOW Centrality Influentials	109.73	134.17	121.85
	MEDIUM Centrality Influentials	116.17	119.67	120.87
	HIGH Centrality Influentials	124.64	118.84	111.94
		Decrease (%) of the Average BT, with respect to LOW Centrality Influentials
		5% Promoters vs 5% Adversaries	10% Promoters vs 10% Adversaries	15% Promoters vs 15% Adversaries
Learning Rate of Weights = 10%	MEDIUM Centrality Influentials	-0.0599947	-0.0369601	0.00990231
	HIGH Centrality Influentials	-0.150849	0.0299957	0.190071
Learning Rate of Weights = 20%	MEDIUM Centrality Influentials	-0.106324	-0.121072	0.0584596
	HIGH Centrality Influentials	-0.191539	-0.0131839	0.0897773
Learning Rate of Weights = 40%	MEDIUM Centrality Influentials	-0.0586895	0.108072	0.00804268
	HIGH Centrality Influentials	-0.135879	0.114258	0.0813295
		Decrease (%) of the Average BT, with respect to Learning Rate of Weights = 10%
		5% Promoters vs 5% Adversaries	10% Promoters vs 10% Adversaries	15% Promoters vs 15% Adversaries
LOW Centrality Influentials	Learning Rate of Weights = 20%	0.239116	0.165923	0.14056
	Learning Rate of Weights = 40%	0.271768	0.180341	0.190204
MEDIUM Centrality Influentials	Learning Rate of Weights = 20%	0.20586	0.0982679	0.182709
	Learning Rate of Weights = 40%	0.272665	0.294981	0.188683
HIGH Centrality Influentials	Learning Rate of Weights = 20%	0.212214	0.128795	0.0341347
	Learning Rate of Weights = 40%	0.281241	0.251543	0.0814803
		Increase (%) of the Average BT, with respect to 5% Promoters vs 5% Adversaries
		10% Promoters vs 10% Adversaries	15% Promoters vs 15% Adversaries
Learning Rate of Weights = 10%	LOW Centrality Influentials	0.0863419	-0.00139368
	MEDIUM Centrality Influentials	0.0627348	-0.0672427
	HIGH Centrality Influentials	-0.0843665	-0.297215
Learning Rate of Weights = 20%	LOW Centrality Influentials	0.190842	0.127955
	MEDIUM Centrality Influentials	0.206717	-0.0400505
	HIGH Centrality Influentials	0.0125906	-0.13835
Learning Rate of Weights = 40%	LOW Centrality Influentials	0.222729	0.110453
	MEDIUM Centrality Influentials	0.0301283	0.0404579
	HIGH Centrality Influentials	-0.046534	-0.101893
