# Supplementary material
Source: MDPI journal article supplement (https://www.mdpi.com/2227-7390/8/12/2235)
Supplement: s1 [file s1 › supplementary/SM III (Spreadsheets of FPL, FNL, MB, MBT, BT)/IT Department (IT).xlsx]

## Sheet: Final Positive Links (FPL)
		Average FPL
		5% Promoters vs 5% Adversaries	10% Promoters vs 10% Adversaries	15% Promoters vs 15% Adversaries
Learning Rate of Weights = 10%	LOW Centrality Influentials	89.27	79.54	69.83
	MEDIUM Centrality Influentials	88.8	77.37	67.57
	HIGH Centrality Influentials	87.26	74.85	65.6
Learning Rate of Weights = 20%	LOW Centrality Influentials	89.68	78.73	69.9
	MEDIUM Centrality Influentials	88.72	77.29	68.12
	HIGH Centrality Influentials	87.31	74.63	65.35
Learning Rate of Weights = 40%	LOW Centrality Influentials	90.18	79.58	70.52
	MEDIUM Centrality Influentials	88.95	77.9	67.51
	HIGH Centrality Influentials	87.23	74.95	65.8
		Decrease (%) of the Average FPL, with respect to LOW Centrality Influentials
		5% Promoters vs 5% Adversaries	10% Promoters vs 10% Adversaries	15% Promoters vs 15% Adversaries
Learning Rate of Weights = 10%	MEDIUM Centrality Influentials	0.00526493	0.0272819	0.0323643
	HIGH Centrality Influentials	0.022516	0.058964	0.0605757
Learning Rate of Weights = 20%	MEDIUM Centrality Influentials	0.0107047	0.0182904	0.0254649
	HIGH Centrality Influentials	0.0264273	0.0520767	0.065093
Learning Rate of Weights = 40%	MEDIUM Centrality Influentials	0.0136394	0.0211108	0.0426829
	HIGH Centrality Influentials	0.0327124	0.0581804	0.0669314
		Decrease (%) of the Average FPL, with respect to Learning Rate of Weights = 10%
		5% Promoters vs 5% Adversaries	10% Promoters vs 10% Adversaries	15% Promoters vs 15% Adversaries
LOW Centrality Influentials	Learning Rate of Weights = 20%	-0.00459281	0.0101836	-0.00100243
	Learning Rate of Weights = 40%	-0.0101938	-0.000502892	-0.00988114
MEDIUM Centrality Influentials	Learning Rate of Weights = 20%	0.000900901	0.00103399	-0.00813971
	Learning Rate of Weights = 40%	-0.00168919	-0.0068502	0.000887968
HIGH Centrality Influentials	Learning Rate of Weights = 20%	-0.000573	0.00293921	0.00381098
	Learning Rate of Weights = 40%	0.0003438	-0.00133601	-0.00304878
		Decrease (%) of the Average FPL, with respect to 5% Promoters vs 5% Adversaries
		10% Promoters vs 10% Adversaries	15% Promoters vs 15% Adversaries
Learning Rate of Weights = 10%	LOW Centrality Influentials	0.108995	0.217766
	MEDIUM Centrality Influentials	0.128716	0.239077
	HIGH Centrality Influentials	0.142219	0.248224
Learning Rate of Weights = 20%	LOW Centrality Influentials	0.122101	0.220562
	MEDIUM Centrality Influentials	0.128832	0.232191
	HIGH Centrality Influentials	0.14523	0.251518
Learning Rate of Weights = 40%	LOW Centrality Influentials	0.117543	0.218008
	MEDIUM Centrality Influentials	0.124227	0.241034
	HIGH Centrality Influentials	0.140777	0.245672

## Sheet: Final Negative Links (FNL)
		Average FNL
		5% Promoters vs 5% Adversaries	10% Promoters vs 10% Adversaries	15% Promoters vs 15% Adversaries
Learning Rate of Weights = 10%	LOW Centrality Influentials	10.73	20.46	30.17
	MEDIUM Centrality Influentials	11.2	22.63	32.43
	HIGH Centrality Influentials	12.74	25.15	34.4
Learning Rate of Weights = 20%	LOW Centrality Influentials	10.32	21.27	30.1
	MEDIUM Centrality Influentials	11.28	22.71	31.88
	HIGH Centrality Influentials	12.69	25.37	34.65
Learning Rate of Weights = 40%	LOW Centrality Influentials	9.82	20.42	29.48
	MEDIUM Centrality Influentials	11.05	22.1	32.49
	HIGH Centrality Influentials	12.77	25.05	34.2
		Increase (%) of the Average FNL, with respect to LOW Centrality Influentials
		5% Promoters vs 5% Adversaries	10% Promoters vs 10% Adversaries	15% Promoters vs 15% Adversaries
Learning Rate of Weights = 10%	MEDIUM Centrality Influentials	0.0438024	0.106061	0.0749088
	HIGH Centrality Influentials	0.187325	0.229228	0.140206
Learning Rate of Weights = 20%	MEDIUM Centrality Influentials	0.0930233	0.067701	0.0591362
	HIGH Centrality Influentials	0.229651	0.19276	0.151163
Learning Rate of Weights = 40%	MEDIUM Centrality Influentials	0.125255	0.0822723	0.102103
	HIGH Centrality Influentials	0.300407	0.226738	0.160109
		Decrease (%) of the Average FNL, with respect to Learning Rate of Weights = 10%
		5% Promoters vs 5% Adversaries	10% Promoters vs 10% Adversaries	15% Promoters vs 15% Adversaries
LOW Centrality Influentials	Learning Rate of Weights = 20%	0.0382106	-0.0395894	0.00232019
	Learning Rate of Weights = 40%	0.0848089	0.00195503	0.0228704
MEDIUM Centrality Influentials	Learning Rate of Weights = 20%	-0.00714286	-0.00353513	0.0169596
	Learning Rate of Weights = 40%	0.0133929	0.0234202	-0.00185014
HIGH Centrality Influentials	Learning Rate of Weights = 20%	0.00392465	-0.00874751	-0.00726744
	Learning Rate of Weights = 40%	-0.00235479	0.00397614	0.00581395
		Increase (%) of the Average FNL, with respect to 5% Promoters vs 5% Adversaries
		10% Promoters vs 10% Adversaries	15% Promoters vs 15% Adversaries
Learning Rate of Weights = 10%	LOW Centrality Influentials	0.906803	1.81174
	MEDIUM Centrality Influentials	1.02054	1.89554
	HIGH Centrality Influentials	0.974097	1.70016
Learning Rate of Weights = 20%	LOW Centrality Influentials	1.06105	1.91667
	MEDIUM Centrality Influentials	1.0133	1.82624
	HIGH Centrality Influentials	0.999212	1.7305
Learning Rate of Weights = 40%	LOW Centrality Influentials	1.07943	2.00204
	MEDIUM Centrality Influentials	1	1.94027
	HIGH Centrality Influentials	0.961629	1.67815

## Sheet: Minimal Balance (MB)
		Average MB
		5% Promoters vs 5% Adversaries	10% Promoters vs 10% Adversaries	15% Promoters vs 15% Adversaries
Learning Rate of Weights = 10%	LOW Centrality Influentials	89.97	81.19	73.13
	MEDIUM Centrality Influentials	89.19	78.87	70.79
	HIGH Centrality Influentials	87.33	75.65	68.42
Learning Rate of Weights = 20%	LOW Centrality Influentials	91.39	82.27	74.82
	MEDIUM Centrality Influentials	89.98	80.66	73.12
	HIGH Centrality Influentials	88.87	77.81	69.74
Learning Rate of Weights = 40%	LOW Centrality Influentials	91.94	84.67	77.49
	MEDIUM Centrality Influentials	90.86	82.05	74.49
	HIGH Centrality Influentials	89.47	79.64	72.22
		Decrease (%) of the Average MB, with respect to LOW Centrality Influentials
		5% Promoters vs 5% Adversaries	10% Promoters vs 10% Adversaries	15% Promoters vs 15% Adversaries
Learning Rate of Weights = 10%	MEDIUM Centrality Influentials	0.00866956	0.0285749	0.0319978
	HIGH Centrality Influentials	0.0293431	0.068235	0.0644059
Learning Rate of Weights = 20%	MEDIUM Centrality Influentials	0.0154284	0.0195697	0.0227212
	HIGH Centrality Influentials	0.0275741	0.0542117	0.0678963
Learning Rate of Weights = 40%	MEDIUM Centrality Influentials	0.0117468	0.0309437	0.0387147
	HIGH Centrality Influentials	0.0268653	0.0594071	0.0680088
		Increase (%) of the Average MB, with respect to Learning Rate of Weights = 10%
		5% Promoters vs 5% Adversaries	10% Promoters vs 10% Adversaries	15% Promoters vs 15% Adversaries
LOW Centrality Influentials	Learning Rate of Weights = 20%	0.015783	0.0133021	0.0231095
	Learning Rate of Weights = 40%	0.0218962	0.0428624	0.0596199
MEDIUM Centrality Influentials	Learning Rate of Weights = 20%	0.0088575	0.0226956	0.0329143
	Learning Rate of Weights = 40%	0.0187241	0.0403195	0.0522673
HIGH Centrality Influentials	Learning Rate of Weights = 20%	0.0176343	0.0285525	0.0192926
	Learning Rate of Weights = 40%	0.0245048	0.0527429	0.0555393
		Decrease (%) of the Average MB, with respect to 5% Promoters vs 5% Adversaries
		10% Promoters vs 10% Adversaries	15% Promoters vs 15% Adversaries
Learning Rate of Weights = 10%	LOW Centrality Influentials	0.0975881	0.187174
	MEDIUM Centrality Influentials	0.115708	0.206301
	HIGH Centrality Influentials	0.133746	0.216535
Learning Rate of Weights = 20%	LOW Centrality Influentials	0.0997921	0.181311
	MEDIUM Centrality Influentials	0.103579	0.187375
	HIGH Centrality Influentials	0.124451	0.215258
Learning Rate of Weights = 40%	LOW Centrality Influentials	0.0790733	0.157168
	MEDIUM Centrality Influentials	0.0969624	0.180167
	HIGH Centrality Influentials	0.109869	0.192802

## Sheet: Minimal Balance Time (MBT)
		Average MBT
		5% Promoters vs 5% Adversaries	10% Promoters vs 10% Adversaries	15% Promoters vs 15% Adversaries
Learning Rate of Weights = 10%	LOW Centrality Influentials	44.79	19.54	17.05
	MEDIUM Centrality Influentials	35.31	18.95	16.55
	HIGH Centrality Influentials	32.53	18.92	15.88
Learning Rate of Weights = 20%	LOW Centrality Influentials	39.86	19.67	18.37
	MEDIUM Centrality Influentials	35.16	20.27	17
	HIGH Centrality Influentials	33.42	18.96	16.1
Learning Rate of Weights = 40%	LOW Centrality Influentials	42.07	24.09	19.28
	MEDIUM Centrality Influentials	34.96	24.08	18.56
	HIGH Centrality Influentials	40.98	20.51	16.71
		Decrease (%) of the Average MBT, with respect to LOW Centrality Influentials
		5% Promoters vs 5% Adversaries	10% Promoters vs 10% Adversaries	15% Promoters vs 15% Adversaries
Learning Rate of Weights = 10%	MEDIUM Centrality Influentials	0.211654	0.0301945	0.0293255
	HIGH Centrality Influentials	0.273722	0.0317298	0.0686217
Learning Rate of Weights = 20%	MEDIUM Centrality Influentials	0.117913	-0.0305033	0.0745781
	HIGH Centrality Influentials	0.161565	0.0360956	0.123571
Learning Rate of Weights = 40%	MEDIUM Centrality Influentials	0.169004	0.00041511	0.0373444
	HIGH Centrality Influentials	0.0259092	0.148609	0.133299
		Increase (%) of the Average MBT, with respect to Learning Rate of Weights = 10%
		5% Promoters vs 5% Adversaries	10% Promoters vs 10% Adversaries	15% Promoters vs 15% Adversaries
LOW Centrality Influentials	Learning Rate of Weights = 20%	-0.110069	0.00665302	0.0774194
	Learning Rate of Weights = 40%	-0.0607278	0.232856	0.130792
MEDIUM Centrality Influentials	Learning Rate of Weights = 20%	-0.00424809	0.069657	0.0271903
	Learning Rate of Weights = 40%	-0.00991221	0.270712	0.12145
HIGH Centrality Influentials	Learning Rate of Weights = 20%	0.0273594	0.00211416	0.0138539
	Learning Rate of Weights = 40%	0.25976	0.0840381	0.052267
		Decrease (%) of the Average MBT, with respect to 5% Promoters vs 5% Adversaries
		10% Promoters vs 10% Adversaries	15% Promoters vs 15% Adversaries
Learning Rate of Weights = 10%	LOW Centrality Influentials	0.563742	0.619335
	MEDIUM Centrality Influentials	0.463325	0.531294
	HIGH Centrality Influentials	0.418383	0.511835
Learning Rate of Weights = 20%	LOW Centrality Influentials	0.506523	0.539137
	MEDIUM Centrality Influentials	0.423493	0.516496
	HIGH Centrality Influentials	0.432675	0.518253
Learning Rate of Weights = 40%	LOW Centrality Influentials	0.427383	0.541716
	MEDIUM Centrality Influentials	0.311213	0.469108
	HIGH Centrality Influentials	0.499512	0.59224

## Sheet: Balance Time (BT)
		Average BT
		5% Promoters vs 5% Adversaries	10% Promoters vs 10% Adversaries	15% Promoters vs 15% Adversaries
Learning Rate of Weights = 10%	LOW Centrality Influentials	193.46	218.18	206.09
	MEDIUM Centrality Influentials	199.73	238.85	197.35
	HIGH Centrality Influentials	224.26	216.6	172.56
Learning Rate of Weights = 20%	LOW Centrality Influentials	146.45	177.12	172.28
	MEDIUM Centrality Influentials	153.61	186.74	159.98
	HIGH Centrality Influentials	180.77	175.17	147.78
Learning Rate of Weights = 40%	LOW Centrality Influentials	119.46	146.18	150.04
	MEDIUM Centrality Influentials	131.41	152.86	135.01
	HIGH Centrality Influentials	145.85	158.21	127.43
		Decrease (%) of the Average BT, with respect to LOW Centrality Influentials
		5% Promoters vs 5% Adversaries	10% Promoters vs 10% Adversaries	15% Promoters vs 15% Adversaries
Learning Rate of Weights = 10%	MEDIUM Centrality Influentials	-0.0324098	-0.0947383	0.0424087
	HIGH Centrality Influentials	-0.159206	0.00724173	0.162696
Learning Rate of Weights = 20%	MEDIUM Centrality Influentials	-0.0488904	-0.0543135	0.0713954
	HIGH Centrality Influentials	-0.234346	0.0110095	0.14221
Learning Rate of Weights = 40%	MEDIUM Centrality Influentials	-0.100033	-0.0456971	0.100173
	HIGH Centrality Influentials	-0.220911	-0.0822958	0.150693
		Decrease (%) of the Average BT, with respect to Learning Rate of Weights = 10%
		5% Promoters vs 5% Adversaries	10% Promoters vs 10% Adversaries	15% Promoters vs 15% Adversaries
LOW Centrality Influentials	Learning Rate of Weights = 20%	0.242996	0.188193	0.164055
	Learning Rate of Weights = 40%	0.382508	0.330003	0.271969
MEDIUM Centrality Influentials	Learning Rate of Weights = 20%	0.230912	0.21817	0.189359
	Learning Rate of Weights = 40%	0.342062	0.360017	0.315885
HIGH Centrality Influentials	Learning Rate of Weights = 20%	0.193927	0.191274	0.143602
	Learning Rate of Weights = 40%	0.349639	0.269575	0.261532
		Increase (%) of the Average BT, with respect to 5% Promoters vs 5% Adversaries
		10% Promoters vs 10% Adversaries	15% Promoters vs 15% Adversaries
Learning Rate of Weights = 10%	LOW Centrality Influentials	0.127778	0.0652848
	MEDIUM Centrality Influentials	0.195864	-0.0119161
	HIGH Centrality Influentials	-0.0341568	-0.230536
Learning Rate of Weights = 20%	LOW Centrality Influentials	0.209423	0.176374
	MEDIUM Centrality Influentials	0.215676	0.0414687
	HIGH Centrality Influentials	-0.0309786	-0.182497
Learning Rate of Weights = 40%	LOW Centrality Influentials	0.223673	0.255985
	MEDIUM Centrality Influentials	0.16323	0.0273952
	HIGH Centrality Influentials	0.0847446	-0.126294
