# Supplementary material
Source: MDPI journal article supplement (https://www.mdpi.com/2227-7390/8/12/2235)
Supplement: s1 [file s1 › supplementary/SM III (Spreadsheets of FPL, FNL, MB, MBT, BT)/Law Firm (LF).xlsx]

## Sheet: Final Positive Links (FPL)
		Average FPL
		5% Promoters vs 5% Adversaries	10% Promoters vs 10% Adversaries	15% Promoters vs 15% Adversaries
Learning Rate of Weights = 10%	LOW Centrality Influentials	89.62	80.27	72.46
	MEDIUM Centrality Influentials	88.81	78.44	69.98
	HIGH Centrality Influentials	86.54	73.13	58.91
Learning Rate of Weights = 20%	LOW Centrality Influentials	89.9	79.84	71.95
	MEDIUM Centrality Influentials	88.91	78.56	70.06
	HIGH Centrality Influentials	86.68	72.82	58.54
Learning Rate of Weights = 40%	LOW Centrality Influentials	89.79	79.96	72.46
	MEDIUM Centrality Influentials	89.02	78.39	70.08
	HIGH Centrality Influentials	86.48	72.6	59.26
		Decrease (%) of the Average FPL, with respect to LOW Centrality Influentials
		5% Promoters vs 5% Adversaries	10% Promoters vs 10% Adversaries	15% Promoters vs 15% Adversaries
Learning Rate of Weights = 10%	MEDIUM Centrality Influentials	0.00903816	0.0227981	0.0342258
	HIGH Centrality Influentials	0.0343673	0.0889498	0.187
Learning Rate of Weights = 20%	MEDIUM Centrality Influentials	0.0110122	0.0160321	0.0262682
	HIGH Centrality Influentials	0.0358176	0.0879259	0.186379
Learning Rate of Weights = 40%	MEDIUM Centrality Influentials	0.00857557	0.0196348	0.0328457
	HIGH Centrality Influentials	0.0368638	0.092046	0.182169
		Decrease (%) of the Average FPL, with respect to Learning Rate of Weights = 10%
		5% Promoters vs 5% Adversaries	10% Promoters vs 10% Adversaries	15% Promoters vs 15% Adversaries
LOW Centrality Influentials	Learning Rate of Weights = 20%	-0.0031243	0.00535692	0.00703837
	Learning Rate of Weights = 40%	-0.0018969	0.00386197	0
MEDIUM Centrality Influentials	Learning Rate of Weights = 20%	-0.001126	-0.00152983	-0.00114318
	Learning Rate of Weights = 40%	-0.0023646	0.00063743	-0.00142898
HIGH Centrality Influentials	Learning Rate of Weights = 20%	-0.00161775	0.00423903	0.00628077
	Learning Rate of Weights = 40%	0.000693321	0.00724737	-0.00594127
		Decrease (%) of the Average FPL, with respect to 5% Promoters vs 5% Adversaries
		10% Promoters vs 10% Adversaries	15% Promoters vs 15% Adversaries
Learning Rate of Weights = 10%	LOW Centrality Influentials	0.104329	0.191475
	MEDIUM Centrality Influentials	0.116766	0.212026
	HIGH Centrality Influentials	0.154957	0.319274
Learning Rate of Weights = 20%	LOW Centrality Influentials	0.111902	0.199666
	MEDIUM Centrality Influentials	0.11641	0.212012
	HIGH Centrality Influentials	0.159898	0.324642
Learning Rate of Weights = 40%	LOW Centrality Influentials	0.109478	0.193006
	MEDIUM Centrality Influentials	0.119411	0.212761
	HIGH Centrality Influentials	0.1605	0.314755

## Sheet: Final Negative Links (FNL)
		Average FNL
		5% Promoters vs 5% Adversaries	10% Promoters vs 10% Adversaries	15% Promoters vs 15% Adversaries
Learning Rate of Weights = 10%	LOW Centrality Influentials	10.38	19.73	27.54
	MEDIUM Centrality Influentials	11.19	21.56	30.02
	HIGH Centrality Influentials	13.46	26.87	41.09
Learning Rate of Weights = 20%	LOW Centrality Influentials	10.1	20.16	28.05
	MEDIUM Centrality Influentials	11.09	21.44	29.94
	HIGH Centrality Influentials	13.32	27.18	41.46
Learning Rate of Weights = 40%	LOW Centrality Influentials	10.21	20.04	27.54
	MEDIUM Centrality Influentials	10.98	21.61	29.92
	HIGH Centrality Influentials	13.52	27.4	40.74
		Increase (%) of the Average FNL, with respect to LOW Centrality Influentials
		5% Promoters vs 5% Adversaries	10% Promoters vs 10% Adversaries	15% Promoters vs 15% Adversaries
Learning Rate of Weights = 10%	MEDIUM Centrality Influentials	0.0780347	0.0927522	0.0900508
	HIGH Centrality Influentials	0.296724	0.361885	0.492012
Learning Rate of Weights = 20%	MEDIUM Centrality Influentials	0.0980198	0.0634921	0.0673797
	HIGH Centrality Influentials	0.318812	0.348214	0.478075
Learning Rate of Weights = 40%	MEDIUM Centrality Influentials	0.0754163	0.0783433	0.0864198
	HIGH Centrality Influentials	0.324192	0.367265	0.479303
		Decrease (%) of the Average FNL, with respect to Learning Rate of Weights = 10%
		5% Promoters vs 5% Adversaries	10% Promoters vs 10% Adversaries	15% Promoters vs 15% Adversaries
LOW Centrality Influentials	Learning Rate of Weights = 20%	0.026975	-0.0217942	-0.0185185
	Learning Rate of Weights = 40%	0.0163776	-0.0157121	0
MEDIUM Centrality Influentials	Learning Rate of Weights = 20%	0.00893655	0.00556586	0.00266489
	Learning Rate of Weights = 40%	0.0187668	-0.00231911	0.00333111
HIGH Centrality Influentials	Learning Rate of Weights = 20%	0.0104012	-0.011537	-0.00900462
	Learning Rate of Weights = 40%	-0.00445765	-0.0197246	0.00851789
		Increase (%) of the Average FNL, with respect to 5% Promoters vs 5% Adversaries
		10% Promoters vs 10% Adversaries	15% Promoters vs 15% Adversaries
Learning Rate of Weights = 10%	LOW Centrality Influentials	0.900771	1.65318
	MEDIUM Centrality Influentials	0.92672	1.68275
	HIGH Centrality Influentials	0.996285	2.05275
Learning Rate of Weights = 20%	LOW Centrality Influentials	0.99604	1.77723
	MEDIUM Centrality Influentials	0.933273	1.69973
	HIGH Centrality Influentials	1.04054	2.11261
Learning Rate of Weights = 40%	LOW Centrality Influentials	0.962782	1.69736
	MEDIUM Centrality Influentials	0.968124	1.72495
	HIGH Centrality Influentials	1.02663	2.01331

## Sheet: Minimal Balance (MB)
		Average MB
		5% Promoters vs 5% Adversaries	10% Promoters vs 10% Adversaries	15% Promoters vs 15% Adversaries
Learning Rate of Weights = 10%	LOW Centrality Influentials	88.35	77.98	71.03
	MEDIUM Centrality Influentials	87.23	75.75	68.91
	HIGH Centrality Influentials	82.53	69.3	63.49
Learning Rate of Weights = 20%	LOW Centrality Influentials	89.84	79.37	72.92
	MEDIUM Centrality Influentials	88.17	77.52	70.83
	HIGH Centrality Influentials	84.13	70.84	64.49
Learning Rate of Weights = 40%	LOW Centrality Influentials	91.14	81.34	75.75
	MEDIUM Centrality Influentials	90.24	79.99	73.56
	HIGH Centrality Influentials	85.92	73.93	66.71
		Decrease (%) of the Average MB, with respect to LOW Centrality Influentials
		5% Promoters vs 5% Adversaries	10% Promoters vs 10% Adversaries	15% Promoters vs 15% Adversaries
Learning Rate of Weights = 10%	MEDIUM Centrality Influentials	0.0126769	0.0285971	0.0298465
	HIGH Centrality Influentials	0.0658744	0.111311	0.106152
Learning Rate of Weights = 20%	MEDIUM Centrality Influentials	0.0185886	0.0233086	0.0286615
	HIGH Centrality Influentials	0.0635574	0.107471	0.115606
Learning Rate of Weights = 40%	MEDIUM Centrality Influentials	0.00987492	0.016597	0.0289109
	HIGH Centrality Influentials	0.0572745	0.0910991	0.11934
		Increase (%) of the Average MB, with respect to Learning Rate of Weights = 10%
		5% Promoters vs 5% Adversaries	10% Promoters vs 10% Adversaries	15% Promoters vs 15% Adversaries
LOW Centrality Influentials	Learning Rate of Weights = 20%	0.0168647	0.0178251	0.0266085
	Learning Rate of Weights = 40%	0.0315789	0.043088	0.0664508
MEDIUM Centrality Influentials	Learning Rate of Weights = 20%	0.0107761	0.0233663	0.0278624
	Learning Rate of Weights = 40%	0.0345065	0.0559736	0.0674793
HIGH Centrality Influentials	Learning Rate of Weights = 20%	0.0193869	0.0222222	0.0157505
	Learning Rate of Weights = 40%	0.041076	0.066811	0.0507166
		Decrease (%) of the Average MB, with respect to 5% Promoters vs 5% Adversaries
		10% Promoters vs 10% Adversaries	15% Promoters vs 15% Adversaries
Learning Rate of Weights = 10%	LOW Centrality Influentials	0.117374	0.196038
	MEDIUM Centrality Influentials	0.131606	0.210019
	HIGH Centrality Influentials	0.160305	0.230704
Learning Rate of Weights = 20%	LOW Centrality Influentials	0.116541	0.188335
	MEDIUM Centrality Influentials	0.120789	0.196666
	HIGH Centrality Influentials	0.15797	0.233448
Learning Rate of Weights = 40%	LOW Centrality Influentials	0.107527	0.168861
	MEDIUM Centrality Influentials	0.113586	0.18484
	HIGH Centrality Influentials	0.139548	0.22358

## Sheet: Minimal Balance Time (MBT)
		Average MBT
		5% Promoters vs 5% Adversaries	10% Promoters vs 10% Adversaries	15% Promoters vs 15% Adversaries
Learning Rate of Weights = 10%	LOW Centrality Influentials	35.64	30.87	29.69
	MEDIUM Centrality Influentials	37.46	30.53	29.19
	HIGH Centrality Influentials	35.34	30.04	25.93
Learning Rate of Weights = 20%	LOW Centrality Influentials	35.21	32.22	29.77
	MEDIUM Centrality Influentials	37.63	32.06	29.11
	HIGH Centrality Influentials	37.7	30.57	26.69
Learning Rate of Weights = 40%	LOW Centrality Influentials	42.73	38.37	33.91
	MEDIUM Centrality Influentials	43	35.98	32.81
	HIGH Centrality Influentials	42.89	35.3	28.34
		Decrease (%) of the Average MBT, with respect to LOW Centrality Influentials
		5% Promoters vs 5% Adversaries	10% Promoters vs 10% Adversaries	15% Promoters vs 15% Adversaries
Learning Rate of Weights = 10%	MEDIUM Centrality Influentials	-0.0510662	0.0110139	0.0168407
	HIGH Centrality Influentials	0.00841751	0.0268869	0.126642
Learning Rate of Weights = 20%	MEDIUM Centrality Influentials	-0.0687305	0.00496586	0.02217
	HIGH Centrality Influentials	-0.0707185	0.0512104	0.10346
Learning Rate of Weights = 40%	MEDIUM Centrality Influentials	-0.00631875	0.0622882	0.0324388
	HIGH Centrality Influentials	-0.00374444	0.0800104	0.164258
		Increase (%) of the Average MBT, with respect to Learning Rate of Weights = 10%
		5% Promoters vs 5% Adversaries	10% Promoters vs 10% Adversaries	15% Promoters vs 15% Adversaries
LOW Centrality Influentials	Learning Rate of Weights = 20%	-0.0120651	0.0437318	0.00269451
	Learning Rate of Weights = 40%	0.198934	0.242954	0.142135
MEDIUM Centrality Influentials	Learning Rate of Weights = 20%	0.00453817	0.0501146	-0.00274066
	Learning Rate of Weights = 40%	0.147891	0.178513	0.124015
HIGH Centrality Influentials	Learning Rate of Weights = 20%	0.0667799	0.0176431	0.0293097
	Learning Rate of Weights = 40%	0.213639	0.1751	0.0929425
		Decrease (%) of the Average MBT, with respect to 5% Promoters vs 5% Adversaries
		10% Promoters vs 10% Adversaries	15% Promoters vs 15% Adversaries
Learning Rate of Weights = 10%	LOW Centrality Influentials	0.133838	0.166947
	MEDIUM Centrality Influentials	0.184997	0.220769
	HIGH Centrality Influentials	0.149972	0.266271
Learning Rate of Weights = 20%	LOW Centrality Influentials	0.0849191	0.154502
	MEDIUM Centrality Influentials	0.14802	0.226415
	HIGH Centrality Influentials	0.189125	0.292042
Learning Rate of Weights = 40%	LOW Centrality Influentials	0.102036	0.206412
	MEDIUM Centrality Influentials	0.163256	0.236977
	HIGH Centrality Influentials	0.176964	0.33924

## Sheet: Balance Time (BT)
		Average BT
		5% Promoters vs 5% Adversaries	10% Promoters vs 10% Adversaries	15% Promoters vs 15% Adversaries
Learning Rate of Weights = 10%	LOW Centrality Influentials	201.13	237.53	289.91
	MEDIUM Centrality Influentials	219.92	260.36	296.7
	HIGH Centrality Influentials	228.45	327.75	265.95
Learning Rate of Weights = 20%	LOW Centrality Influentials	189.96	226.18	252.14
	MEDIUM Centrality Influentials	193.86	235.87	273.51
	HIGH Centrality Influentials	212.51	272.81	247.42
Learning Rate of Weights = 40%	LOW Centrality Influentials	192.1	214.13	224.72
	MEDIUM Centrality Influentials	191.45	213.65	238.33
	HIGH Centrality Influentials	216.35	251.72	234.31
		Decrease (%) of the Average BT, with respect to LOW Centrality Influentials
		5% Promoters vs 5% Adversaries	10% Promoters vs 10% Adversaries	15% Promoters vs 15% Adversaries
Learning Rate of Weights = 10%	MEDIUM Centrality Influentials	-0.0934222	-0.0961142	-0.0234211
	HIGH Centrality Influentials	-0.135833	-0.379826	0.0826463
Learning Rate of Weights = 20%	MEDIUM Centrality Influentials	-0.0205306	-0.042842	-0.0847545
	HIGH Centrality Influentials	-0.118709	-0.206163	0.0187198
Learning Rate of Weights = 40%	MEDIUM Centrality Influentials	0.00338365	0.00224163	-0.0605643
	HIGH Centrality Influentials	-0.126236	-0.175548	-0.0426753
		Decrease (%) of the Average BT, with respect to Learning Rate of Weights = 10%
		5% Promoters vs 5% Adversaries	10% Promoters vs 10% Adversaries	15% Promoters vs 15% Adversaries
LOW Centrality Influentials	Learning Rate of Weights = 20%	0.0555362	0.0477834	0.130282
	Learning Rate of Weights = 40%	0.0448963	0.0985139	0.224863
MEDIUM Centrality Influentials	Learning Rate of Weights = 20%	0.118498	0.0940621	0.0781598
	Learning Rate of Weights = 40%	0.129456	0.179405	0.196731
HIGH Centrality Influentials	Learning Rate of Weights = 20%	0.0697746	0.167628	0.0696748
	Learning Rate of Weights = 40%	0.0529656	0.231976	0.11897
		Increase (%) of the Average BT, with respect to 5% Promoters vs 5% Adversaries
		10% Promoters vs 10% Adversaries	15% Promoters vs 15% Adversaries
Learning Rate of Weights = 10%	LOW Centrality Influentials	0.180977	0.441406
	MEDIUM Centrality Influentials	0.183885	0.349127
	HIGH Centrality Influentials	0.434668	0.16415
Learning Rate of Weights = 20%	LOW Centrality Influentials	0.190672	0.327332
	MEDIUM Centrality Influentials	0.216703	0.410864
	HIGH Centrality Influentials	0.283751	0.164275
Learning Rate of Weights = 40%	LOW Centrality Influentials	0.11468	0.169807
	MEDIUM Centrality Influentials	0.115957	0.244868
	HIGH Centrality Influentials	0.163485	0.0830136
