# Supplementary material
Source: MDPI journal article supplement (https://www.mdpi.com/2227-7390/8/12/2235)
Supplement: s1 [file s1 › supplementary/SM III (Spreadsheets of FPL, FNL, MB, MBT, BT)/Manufacturing Company (MC).xlsx]

## Sheet: Final Positive Links (FPL)
		Average FPL
		5% Promoters vs 5% Adversaries	10% Promoters vs 10% Adversaries	15% Promoters vs 15% Adversaries
Learning Rate of Weights = 10%	LOW Centrality Influentials	90.69	81.12	70.86
	MEDIUM Centrality Influentials	89.95	79.31	67.77
	HIGH Centrality Influentials	87.51	72.97	60.27
Learning Rate of Weights = 20%	LOW Centrality Influentials	90.51	80.96	71.3
	MEDIUM Centrality Influentials	89.65	80.09	68.71
	HIGH Centrality Influentials	87.59	73.24	60.13
Learning Rate of Weights = 40%	LOW Centrality Influentials	90.49	81.15	71.6
	MEDIUM Centrality Influentials	89.79	80.13	67.89
	HIGH Centrality Influentials	87.76	74.36	60.04
		Decrease (%) of the Average FPL, with respect to LOW Centrality Influentials
		5% Promoters vs 5% Adversaries	10% Promoters vs 10% Adversaries	15% Promoters vs 15% Adversaries
Learning Rate of Weights = 10%	MEDIUM Centrality Influentials	0.00815966	0.0223126	0.0436071
	HIGH Centrality Influentials	0.0350645	0.100468	0.14945
Learning Rate of Weights = 20%	MEDIUM Centrality Influentials	0.00950171	0.010746	0.0363254
	HIGH Centrality Influentials	0.0322616	0.0953557	0.156662
Learning Rate of Weights = 40%	MEDIUM Centrality Influentials	0.00773566	0.0125693	0.0518156
	HIGH Centrality Influentials	0.0301691	0.0836722	0.161453
		Decrease (%) of the Average FPL, with respect to Learning Rate of Weights = 10%
		5% Promoters vs 5% Adversaries	10% Promoters vs 10% Adversaries	15% Promoters vs 15% Adversaries
LOW Centrality Influentials	Learning Rate of Weights = 20%	0.00198478	0.00197239	-0.00620943
	Learning Rate of Weights = 40%	0.00220531	-0.000369822	-0.0104431
MEDIUM Centrality Influentials	Learning Rate of Weights = 20%	0.00333519	-0.00983483	-0.0138704
	Learning Rate of Weights = 40%	0.00177877	-0.0103392	-0.00177069
HIGH Centrality Influentials	Learning Rate of Weights = 20%	-0.000914181	-0.00370015	0.00232288
	Learning Rate of Weights = 40%	-0.00285682	-0.0190489	0.00381616
		Decrease (%) of the Average FPL, with respect to 5% Promoters vs 5% Adversaries
		10% Promoters vs 10% Adversaries	15% Promoters vs 15% Adversaries
Learning Rate of Weights = 10%	LOW Centrality Influentials	0.105524	0.218657
	MEDIUM Centrality Influentials	0.118288	0.246581
	HIGH Centrality Influentials	0.166152	0.311279
Learning Rate of Weights = 20%	LOW Centrality Influentials	0.105513	0.212242
	MEDIUM Centrality Influentials	0.106637	0.233575
	HIGH Centrality Influentials	0.163831	0.313506
Learning Rate of Weights = 40%	LOW Centrality Influentials	0.103216	0.208752
	MEDIUM Centrality Influentials	0.107584	0.243902
	HIGH Centrality Influentials	0.152689	0.315861

## Sheet: Final Negative Links (FNL)
		Average FNL
		5% Promoters vs 5% Adversaries	10% Promoters vs 10% Adversaries	15% Promoters vs 15% Adversaries
Learning Rate of Weights = 10%	LOW Centrality Influentials	9.31	18.88	29.14
	MEDIUM Centrality Influentials	10.05	20.69	32.23
	HIGH Centrality Influentials	12.49	27.03	39.73
Learning Rate of Weights = 20%	LOW Centrality Influentials	9.49	19.04	28.7
	MEDIUM Centrality Influentials	10.35	19.91	31.29
	HIGH Centrality Influentials	12.41	26.76	39.87
Learning Rate of Weights = 40%	LOW Centrality Influentials	9.51	18.85	28.4
	MEDIUM Centrality Influentials	10.21	19.87	32.11
	HIGH Centrality Influentials	12.24	25.64	39.96
		Increase (%) of the Average FNL, with respect to LOW Centrality Influentials
		5% Promoters vs 5% Adversaries	10% Promoters vs 10% Adversaries	15% Promoters vs 15% Adversaries
Learning Rate of Weights = 10%	MEDIUM Centrality Influentials	0.0794844	0.0958686	0.10604
	HIGH Centrality Influentials	0.341568	0.431674	0.363418
Learning Rate of Weights = 20%	MEDIUM Centrality Influentials	0.0906217	0.0456933	0.0902439
	HIGH Centrality Influentials	0.307692	0.405462	0.389199
Learning Rate of Weights = 40%	MEDIUM Centrality Influentials	0.0736067	0.0541114	0.130634
	HIGH Centrality Influentials	0.287066	0.360212	0.407042
		Decrease (%) of the Average FNL, with respect to Learning Rate of Weights = 10%
		5% Promoters vs 5% Adversaries	10% Promoters vs 10% Adversaries	15% Promoters vs 15% Adversaries
LOW Centrality Influentials	Learning Rate of Weights = 20%	-0.019334	-0.00847458	0.0150995
	Learning Rate of Weights = 40%	-0.0214823	0.00158898	0.0253946
MEDIUM Centrality Influentials	Learning Rate of Weights = 20%	-0.0298507	0.0376994	0.0291654
	Learning Rate of Weights = 40%	-0.0159204	0.0396327	0.00372324
HIGH Centrality Influentials	Learning Rate of Weights = 20%	0.00640512	0.0099889	-0.00352379
	Learning Rate of Weights = 40%	0.020016	0.0514243	-0.00578908
		Increase (%) of the Average FNL, with respect to 5% Promoters vs 5% Adversaries
		10% Promoters vs 10% Adversaries	15% Promoters vs 15% Adversaries
Learning Rate of Weights = 10%	LOW Centrality Influentials	1.02793	2.12997
	MEDIUM Centrality Influentials	1.05871	2.20697
	HIGH Centrality Influentials	1.16413	2.18094
Learning Rate of Weights = 20%	LOW Centrality Influentials	1.00632	2.02424
	MEDIUM Centrality Influentials	0.923671	2.02319
	HIGH Centrality Influentials	1.15633	2.21273
Learning Rate of Weights = 40%	LOW Centrality Influentials	0.982124	1.98633
	MEDIUM Centrality Influentials	0.946131	2.14496
	HIGH Centrality Influentials	1.09477	2.26471

## Sheet: Minimal Balance (MB)
		Average MB
		5% Promoters vs 5% Adversaries	10% Promoters vs 10% Adversaries	15% Promoters vs 15% Adversaries
Learning Rate of Weights = 10%	LOW Centrality Influentials	90.23	79.83	71.23
	MEDIUM Centrality Influentials	88.85	77.67	69.31
	HIGH Centrality Influentials	85.06	71.84	64.54
Learning Rate of Weights = 20%	LOW Centrality Influentials	90.5	80.94	72.66
	MEDIUM Centrality Influentials	89.48	79.14	70.76
	HIGH Centrality Influentials	85.92	72.88	65.56
Learning Rate of Weights = 40%	LOW Centrality Influentials	90.99	82.83	74.78
	MEDIUM Centrality Influentials	90.41	81.74	72.66
	HIGH Centrality Influentials	87.87	75.75	67.15
		Decrease (%) of the Average MB, with respect to LOW Centrality Influentials
		5% Promoters vs 5% Adversaries	10% Promoters vs 10% Adversaries	15% Promoters vs 15% Adversaries
Learning Rate of Weights = 10%	MEDIUM Centrality Influentials	0.0152942	0.0270575	0.0269549
	HIGH Centrality Influentials	0.057298	0.100088	0.0939211
Learning Rate of Weights = 20%	MEDIUM Centrality Influentials	0.0112707	0.0222387	0.0261492
	HIGH Centrality Influentials	0.0506077	0.0995799	0.0977154
Learning Rate of Weights = 40%	MEDIUM Centrality Influentials	0.00637433	0.0131595	0.0283498
	HIGH Centrality Influentials	0.0342895	0.0854763	0.102033
		Increase (%) of the Average MB, with respect to Learning Rate of Weights = 10%
		5% Promoters vs 5% Adversaries	10% Promoters vs 10% Adversaries	15% Promoters vs 15% Adversaries
LOW Centrality Influentials	Learning Rate of Weights = 20%	0.00299235	0.0139045	0.0200758
	Learning Rate of Weights = 40%	0.00842292	0.0375799	0.0498386
MEDIUM Centrality Influentials	Learning Rate of Weights = 20%	0.0070906	0.0189262	0.0209205
	Learning Rate of Weights = 40%	0.0175577	0.0524012	0.0483336
HIGH Centrality Influentials	Learning Rate of Weights = 20%	0.0101105	0.0144766	0.0158042
	Learning Rate of Weights = 40%	0.0330355	0.0544265	0.04044
		Decrease (%) of the Average MB, with respect to 5% Promoters vs 5% Adversaries
		10% Promoters vs 10% Adversaries	15% Promoters vs 15% Adversaries
Learning Rate of Weights = 10%	LOW Centrality Influentials	0.115261	0.210573
	MEDIUM Centrality Influentials	0.12583	0.219921
	HIGH Centrality Influentials	0.15542	0.241241
Learning Rate of Weights = 20%	LOW Centrality Influentials	0.105635	0.197127
	MEDIUM Centrality Influentials	0.115557	0.209209
	HIGH Centrality Influentials	0.151769	0.236965
Learning Rate of Weights = 40%	LOW Centrality Influentials	0.0896802	0.178151
	MEDIUM Centrality Influentials	0.0958965	0.196328
	HIGH Centrality Influentials	0.137931	0.235803

## Sheet: Minimal Balance Time (MBT)
		Average MBT
		5% Promoters vs 5% Adversaries	10% Promoters vs 10% Adversaries	15% Promoters vs 15% Adversaries
Learning Rate of Weights = 10%	LOW Centrality Influentials	41.17	35.68	33.01
	MEDIUM Centrality Influentials	44.76	35.09	32.99
	HIGH Centrality Influentials	38.87	34.76	29.66
Learning Rate of Weights = 20%	LOW Centrality Influentials	44.49	35.75	33.68
	MEDIUM Centrality Influentials	43.3	36.73	33.3
	HIGH Centrality Influentials	42.83	34.52	30.16
Learning Rate of Weights = 40%	LOW Centrality Influentials	50.22	44.97	36.1
	MEDIUM Centrality Influentials	47.11	42.49	36.12
	HIGH Centrality Influentials	48.66	36.97	31.49
		Decrease (%) of the Average MBT, with respect to LOW Centrality Influentials
		5% Promoters vs 5% Adversaries	10% Promoters vs 10% Adversaries	15% Promoters vs 15% Adversaries
Learning Rate of Weights = 10%	MEDIUM Centrality Influentials	-0.0871994	0.0165359	0.000605877
	HIGH Centrality Influentials	0.0558659	0.0257848	0.101484
Learning Rate of Weights = 20%	MEDIUM Centrality Influentials	0.0267476	-0.0274126	0.0112827
	HIGH Centrality Influentials	0.0373118	0.0344056	0.104513
Learning Rate of Weights = 40%	MEDIUM Centrality Influentials	0.0619275	0.0551479	-0.000554017
	HIGH Centrality Influentials	0.0310633	0.177896	0.127701
		Increase (%) of the Average MBT, with respect to Learning Rate of Weights = 10%
		5% Promoters vs 5% Adversaries	10% Promoters vs 10% Adversaries	15% Promoters vs 15% Adversaries
LOW Centrality Influentials	Learning Rate of Weights = 20%	0.0806412	0.00196188	0.0202969
	Learning Rate of Weights = 40%	0.21982	0.26037	0.093608
MEDIUM Centrality Influentials	Learning Rate of Weights = 20%	-0.0326184	0.046737	0.00939679
	Learning Rate of Weights = 40%	0.0525022	0.210886	0.0948772
HIGH Centrality Influentials	Learning Rate of Weights = 20%	0.101878	-0.00690449	0.0168577
	Learning Rate of Weights = 40%	0.251865	0.0635788	0.0616993
		Decrease (%) of the Average MBT, with respect to 5% Promoters vs 5% Adversaries
		10% Promoters vs 10% Adversaries	15% Promoters vs 15% Adversaries
Learning Rate of Weights = 10%	LOW Centrality Influentials	0.13335	0.198203
	MEDIUM Centrality Influentials	0.216041	0.262958
	HIGH Centrality Influentials	0.105737	0.236944
Learning Rate of Weights = 20%	LOW Centrality Influentials	0.196449	0.242976
	MEDIUM Centrality Influentials	0.151732	0.230947
	HIGH Centrality Influentials	0.194023	0.295821
Learning Rate of Weights = 40%	LOW Centrality Influentials	0.10454	0.281163
	MEDIUM Centrality Influentials	0.0980684	0.233284
	HIGH Centrality Influentials	0.240238	0.352857

## Sheet: Balance Time (BT)
		Average BT
		5% Promoters vs 5% Adversaries	10% Promoters vs 10% Adversaries	15% Promoters vs 15% Adversaries
Learning Rate of Weights = 10%	LOW Centrality Influentials	265.11	315.49	370.55
	MEDIUM Centrality Influentials	279.81	337.77	380.84
	HIGH Centrality Influentials	311.54	393.57	315.03
Learning Rate of Weights = 20%	LOW Centrality Influentials	241.58	291.86	329.96
	MEDIUM Centrality Influentials	244.11	290.07	315.99
	HIGH Centrality Influentials	287.05	328.27	310.62
Learning Rate of Weights = 40%	LOW Centrality Influentials	242.03	273.09	295.42
	MEDIUM Centrality Influentials	241.83	276.49	311.82
	HIGH Centrality Influentials	268	301.83	279.44
		Decrease (%) of the Average BT, with respect to LOW Centrality Influentials
		5% Promoters vs 5% Adversaries	10% Promoters vs 10% Adversaries	15% Promoters vs 15% Adversaries
Learning Rate of Weights = 10%	MEDIUM Centrality Influentials	-0.0554487	-0.0706203	-0.0277695
	HIGH Centrality Influentials	-0.175135	-0.247488	0.149831
Learning Rate of Weights = 20%	MEDIUM Centrality Influentials	-0.0104727	0.00613308	0.0423385
	HIGH Centrality Influentials	-0.188219	-0.124752	0.0586132
Learning Rate of Weights = 40%	MEDIUM Centrality Influentials	0.000826344	-0.0124501	-0.0555142
	HIGH Centrality Influentials	-0.107301	-0.10524	0.0540925
		Decrease (%) of the Average BT, with respect to Learning Rate of Weights = 10%
		5% Promoters vs 5% Adversaries	10% Promoters vs 10% Adversaries	15% Promoters vs 15% Adversaries
LOW Centrality Influentials	Learning Rate of Weights = 20%	0.0887556	0.0748994	0.10954
	Learning Rate of Weights = 40%	0.0870582	0.134394	0.202753
MEDIUM Centrality Influentials	Learning Rate of Weights = 20%	0.127587	0.14122	0.170281
	Learning Rate of Weights = 40%	0.135735	0.181425	0.181231
HIGH Centrality Influentials	Learning Rate of Weights = 20%	0.0786095	0.165917	0.0139987
	Learning Rate of Weights = 40%	0.139757	0.233097	0.112973
		Increase (%) of the Average BT, with respect to 5% Promoters vs 5% Adversaries
		10% Promoters vs 10% Adversaries	15% Promoters vs 15% Adversaries
Learning Rate of Weights = 10%	LOW Centrality Influentials	0.190034	0.397722
	MEDIUM Centrality Influentials	0.207141	0.361066
	HIGH Centrality Influentials	0.263305	0.0112024
Learning Rate of Weights = 20%	LOW Centrality Influentials	0.20813	0.365842
	MEDIUM Centrality Influentials	0.188276	0.294457
	HIGH Centrality Influentials	0.143599	0.0821111
Learning Rate of Weights = 40%	LOW Centrality Influentials	0.128331	0.220592
	MEDIUM Centrality Influentials	0.143324	0.289418
	HIGH Centrality Influentials	0.126231	0.0426866
