# Supplementary material
Source: MDPI journal article supplement (https://www.mdpi.com/2227-7390/8/12/2235)

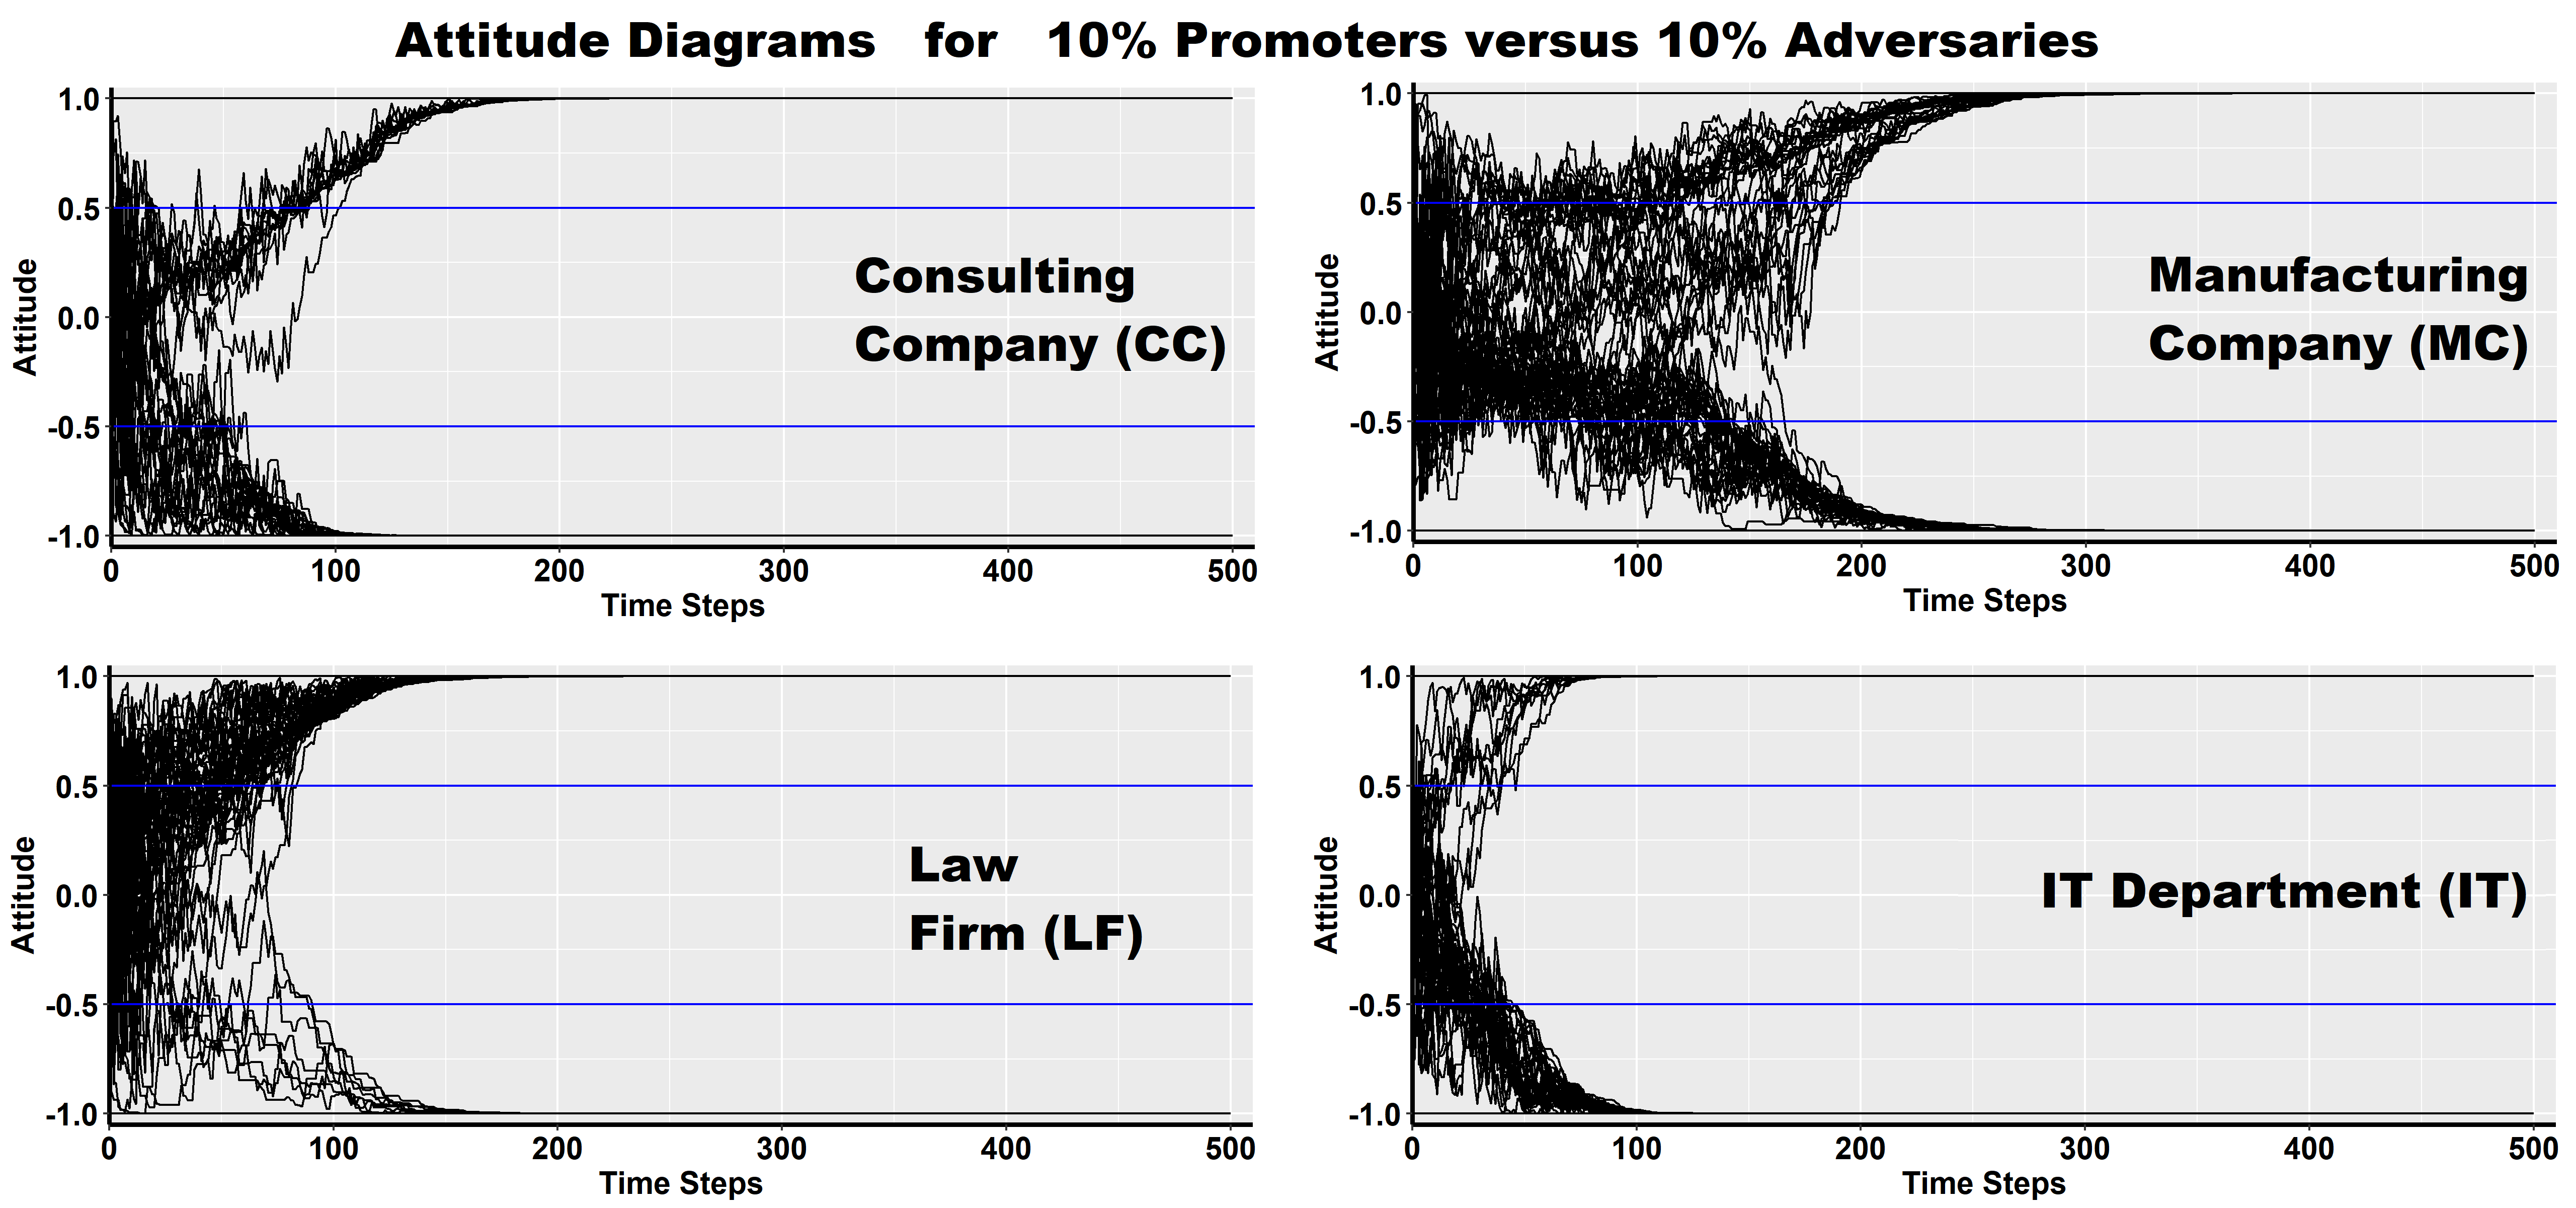

Supplement: s1 [file s1 › supplementary/SM II (Figures of AD, CAD, SLD, BD)/10% vs 10%/AD (10% vs 10%).png]

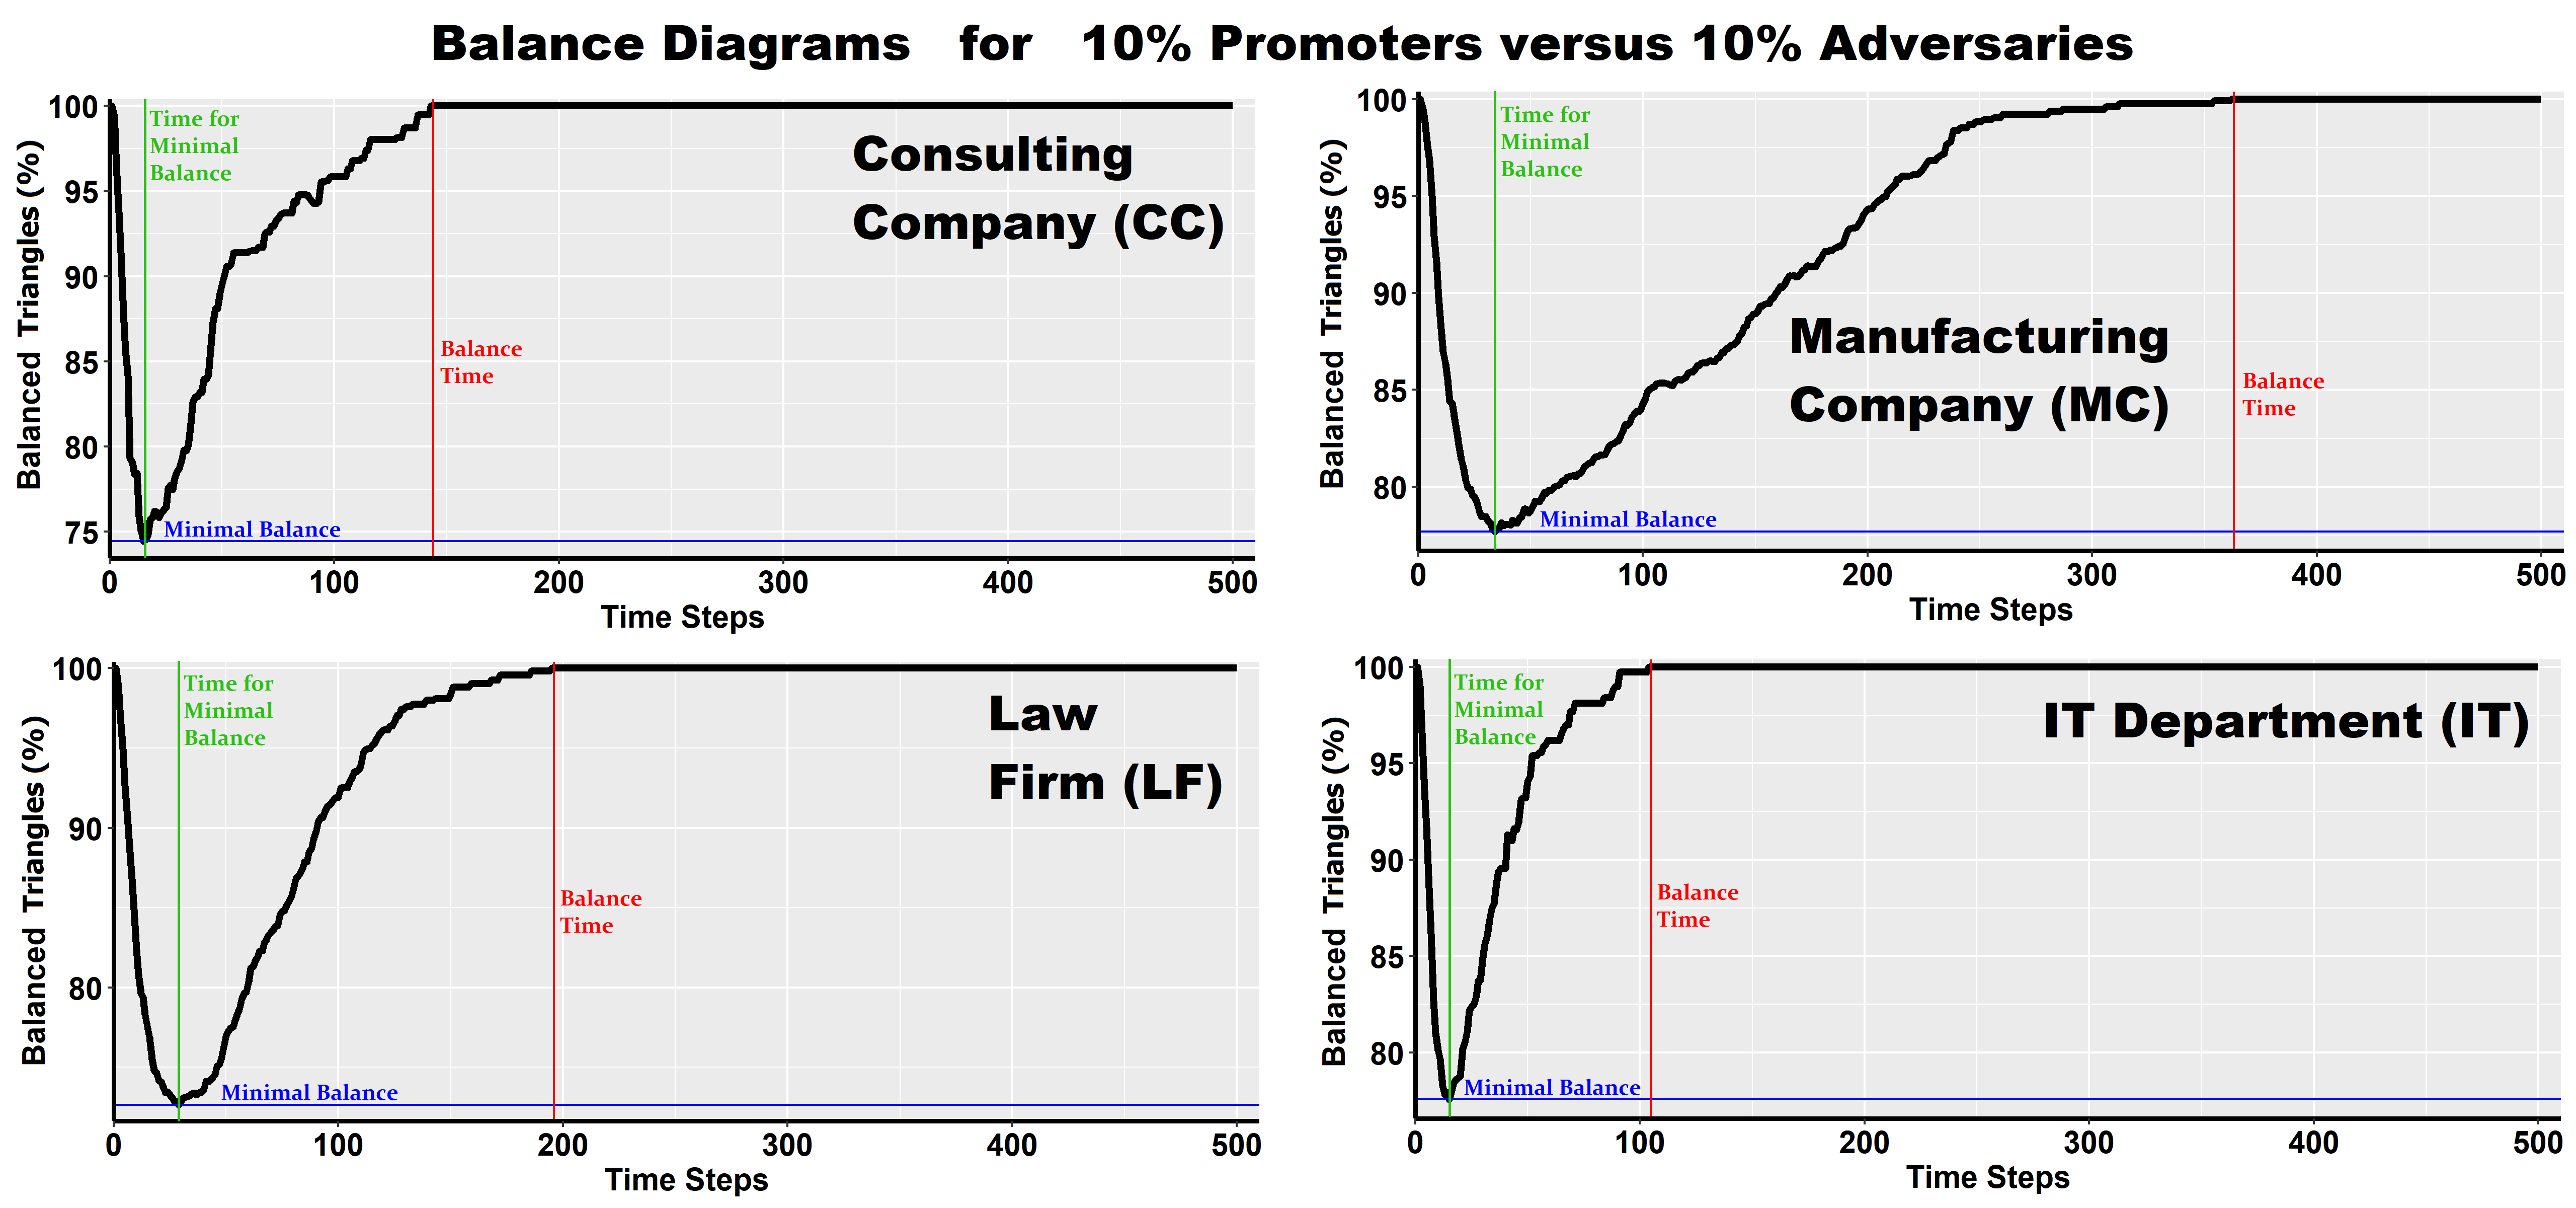

Supplement: s1 [file s1 › supplementary/SM II (Figures of AD, CAD, SLD, BD)/10% vs 10%/BD (10% vs 10%).png]

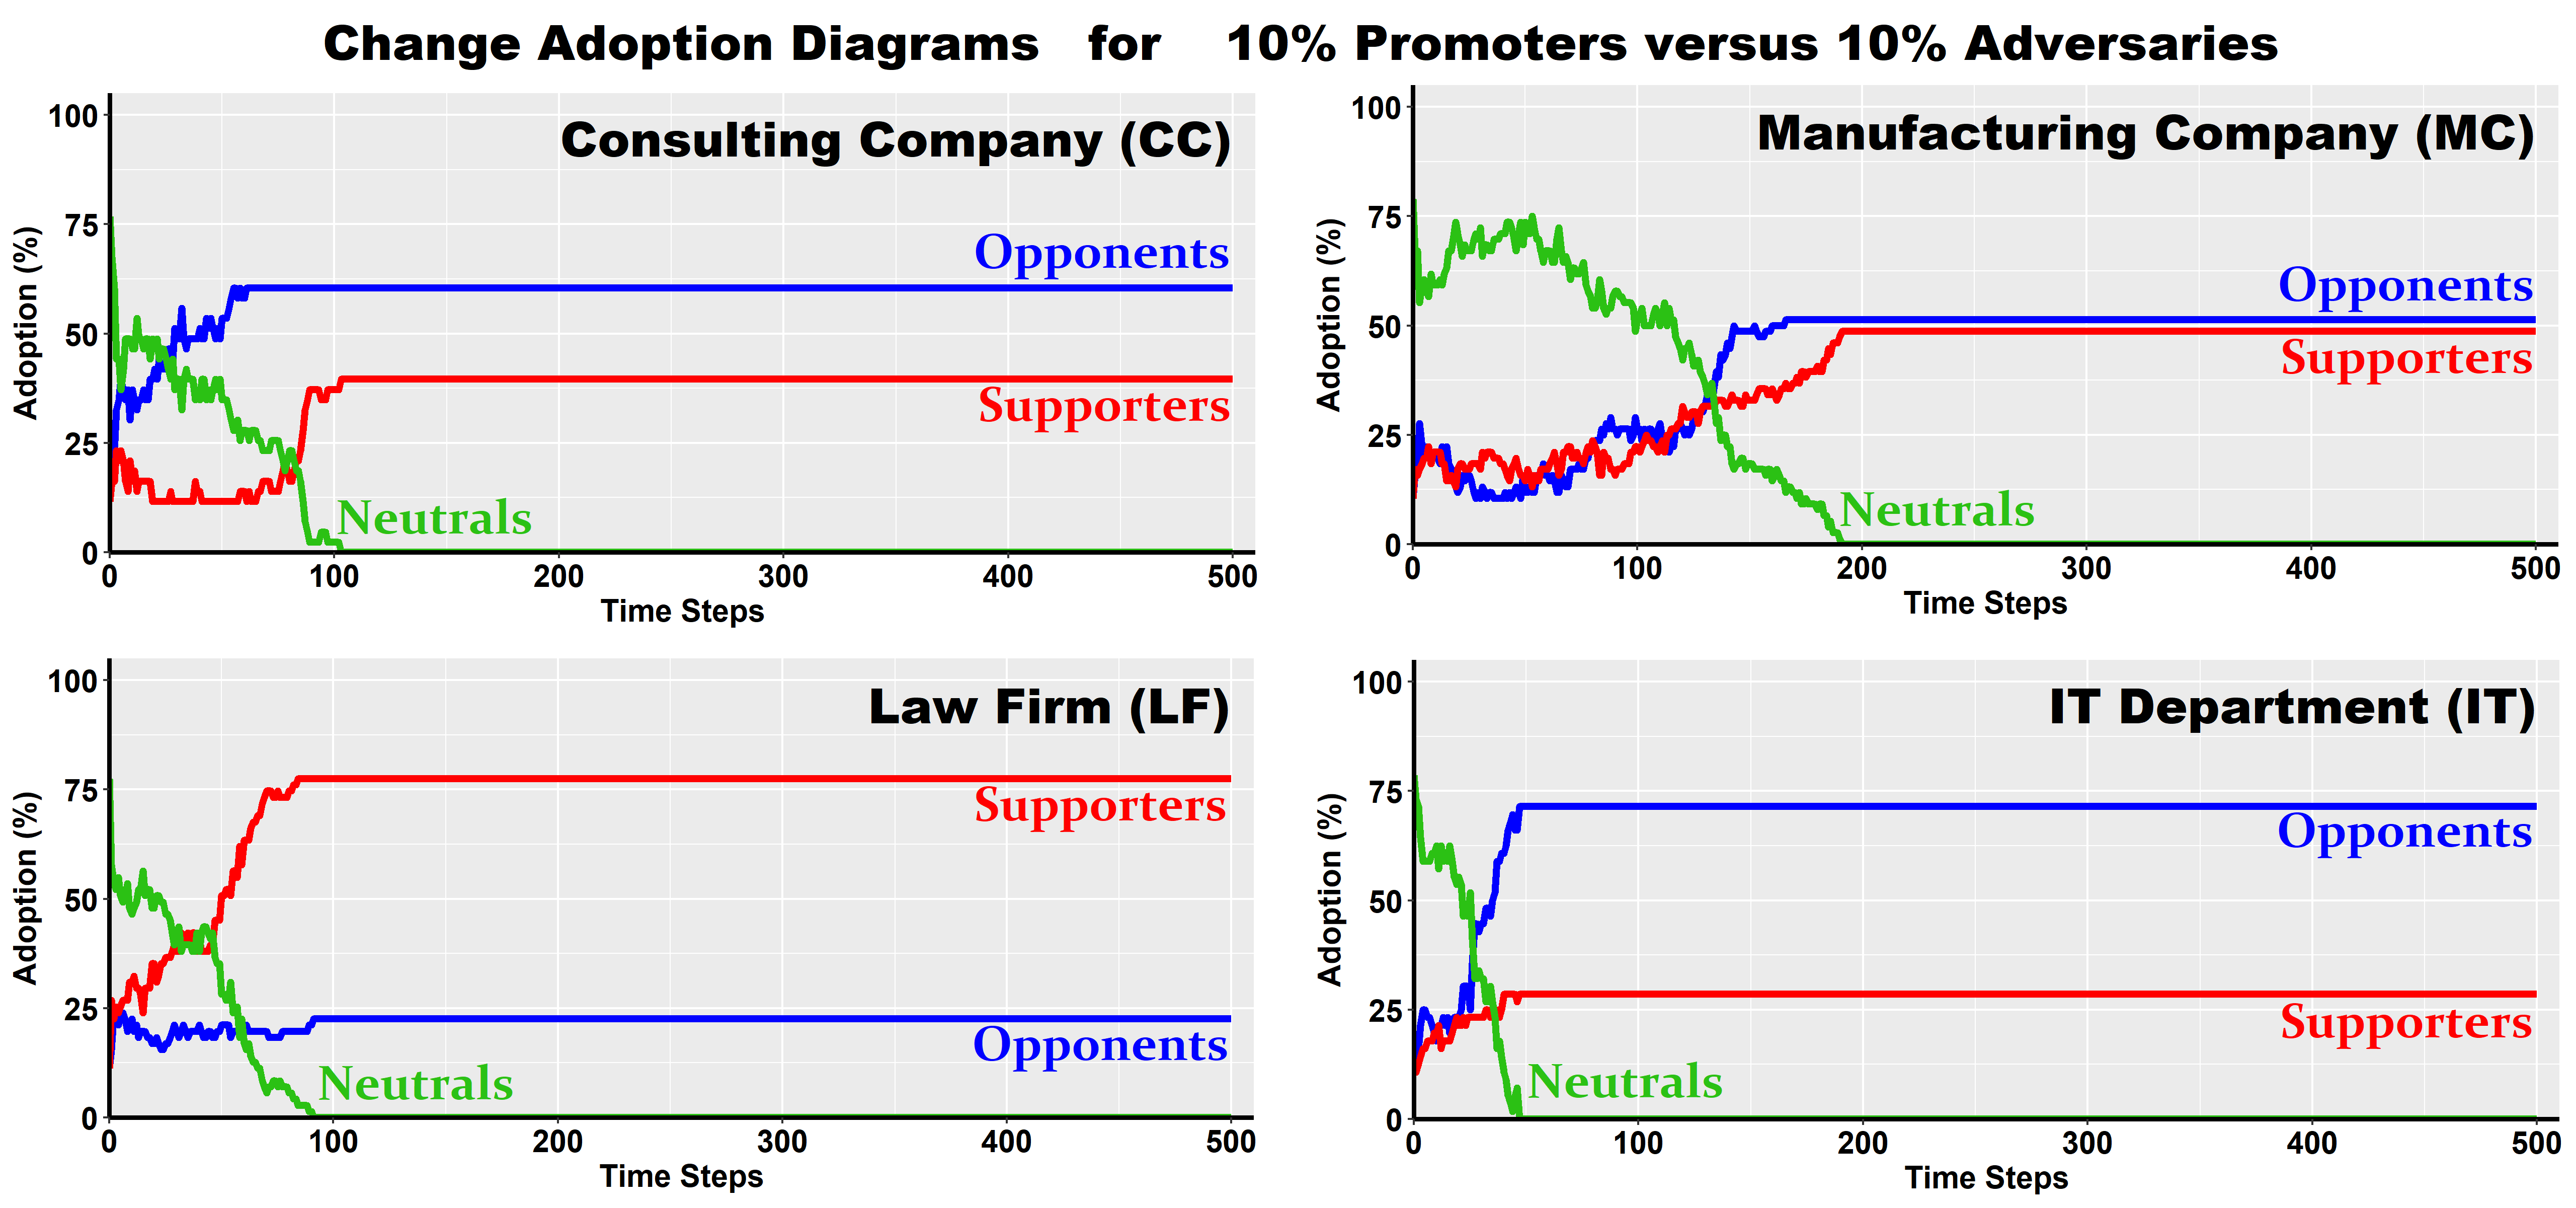

Supplement: s1 [file s1 › supplementary/SM II (Figures of AD, CAD, SLD, BD)/10% vs 10%/CAD (10% vs 10%).png]

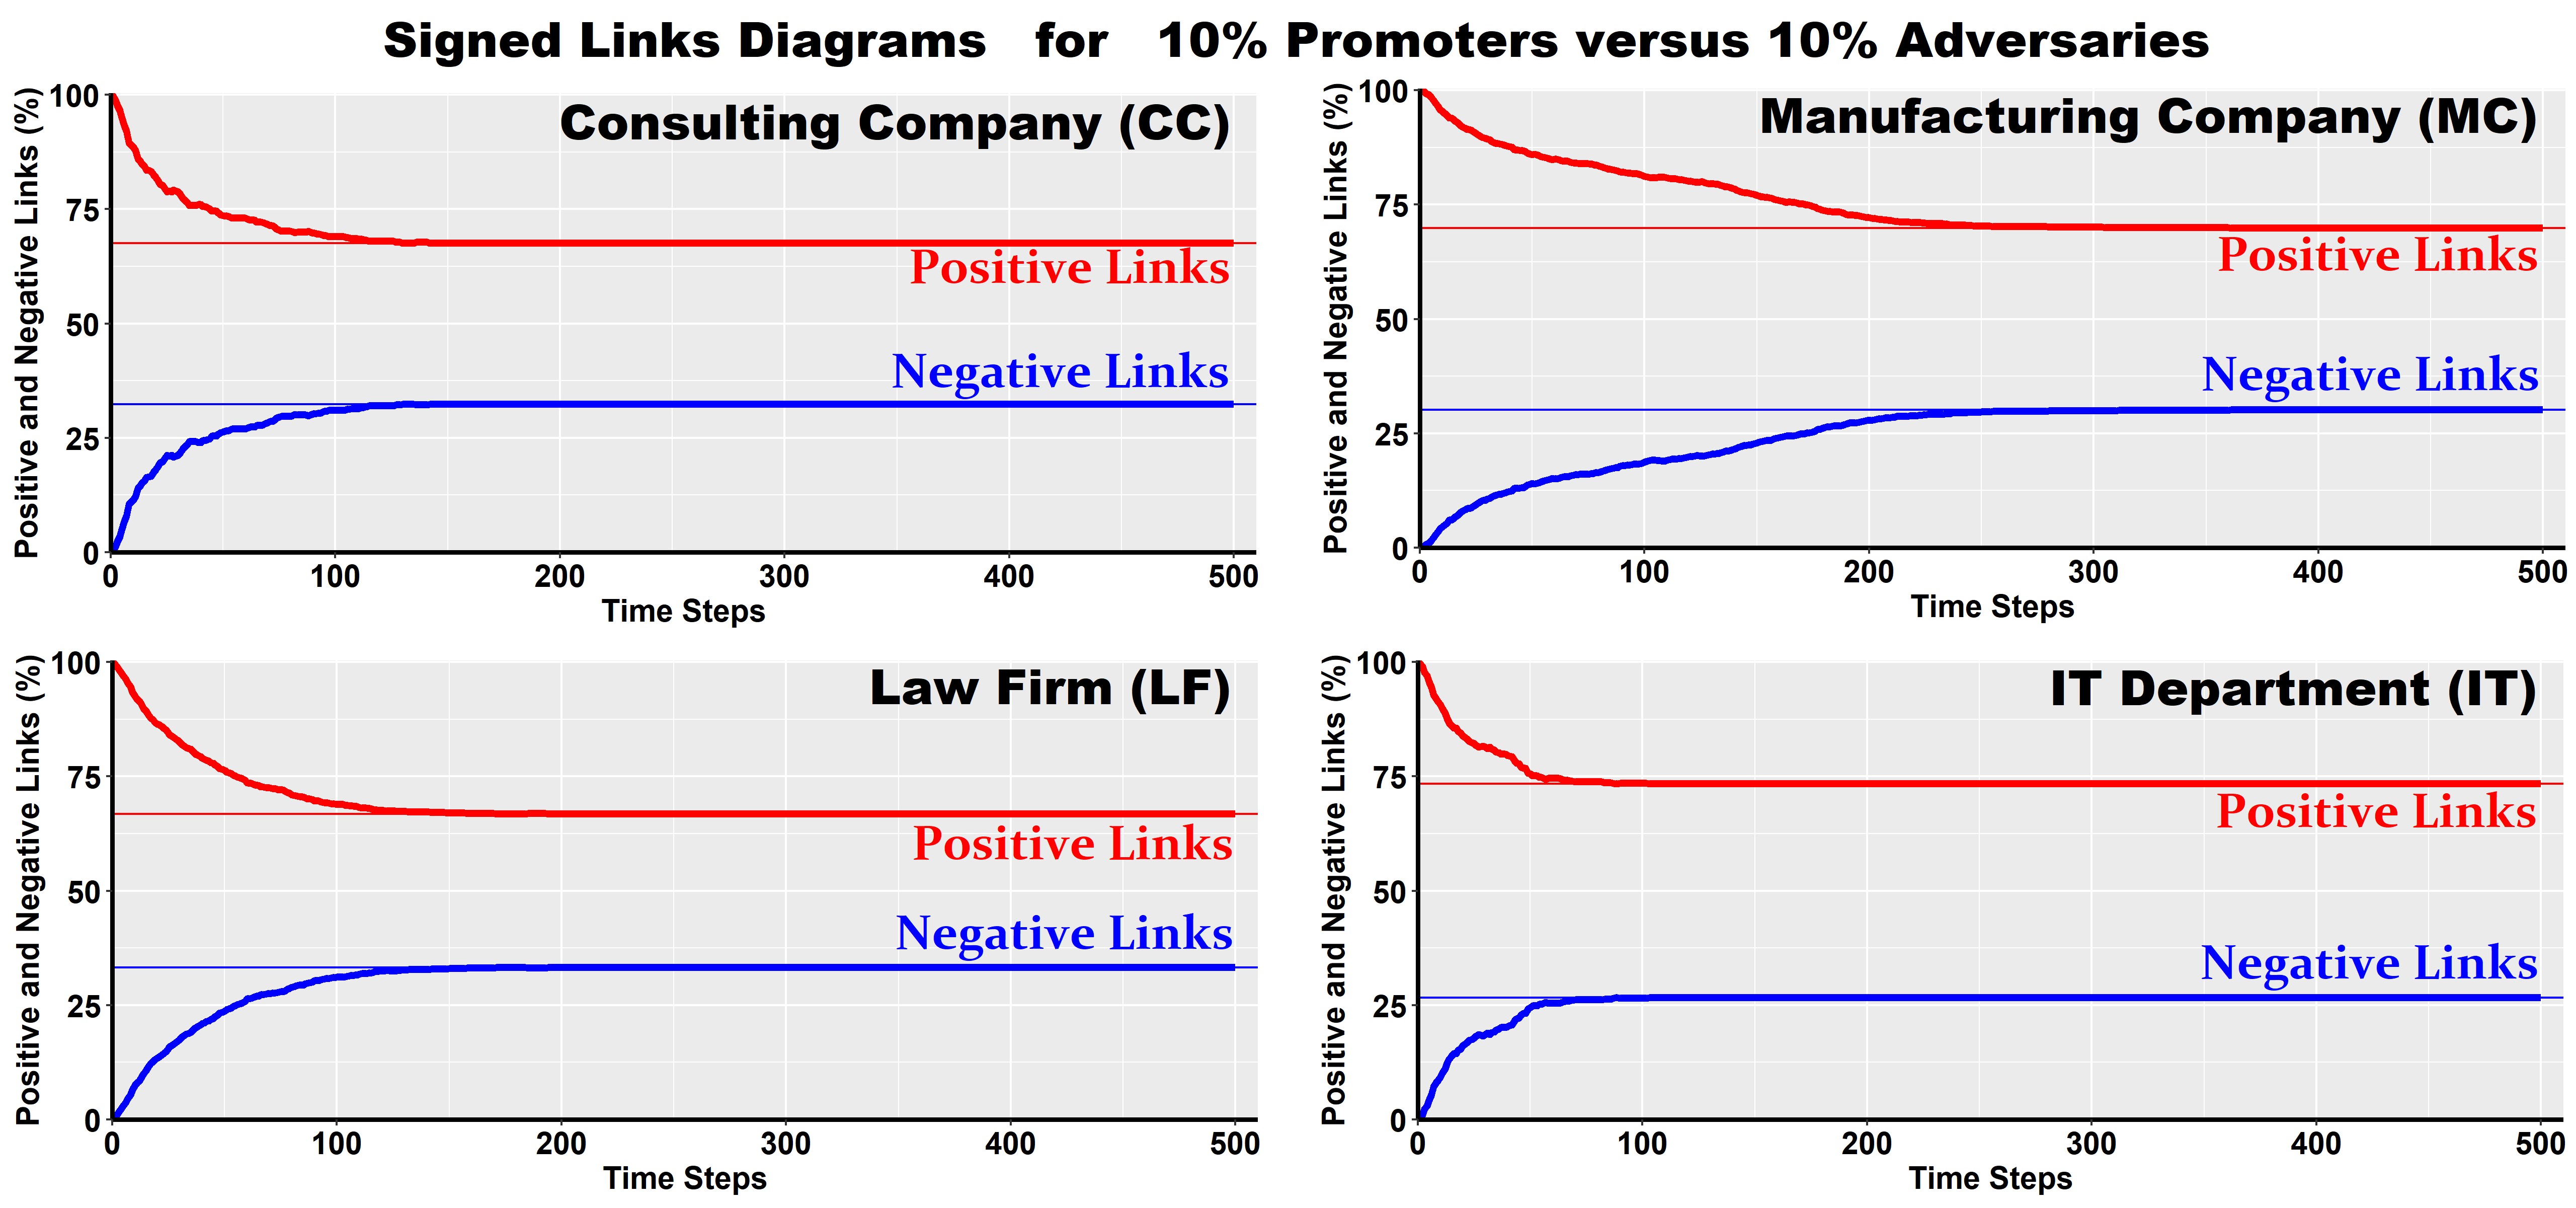

Supplement: s1 [file s1 › supplementary/SM II (Figures of AD, CAD, SLD, BD)/10% vs 10%/SLD (10% vs 10%).png]

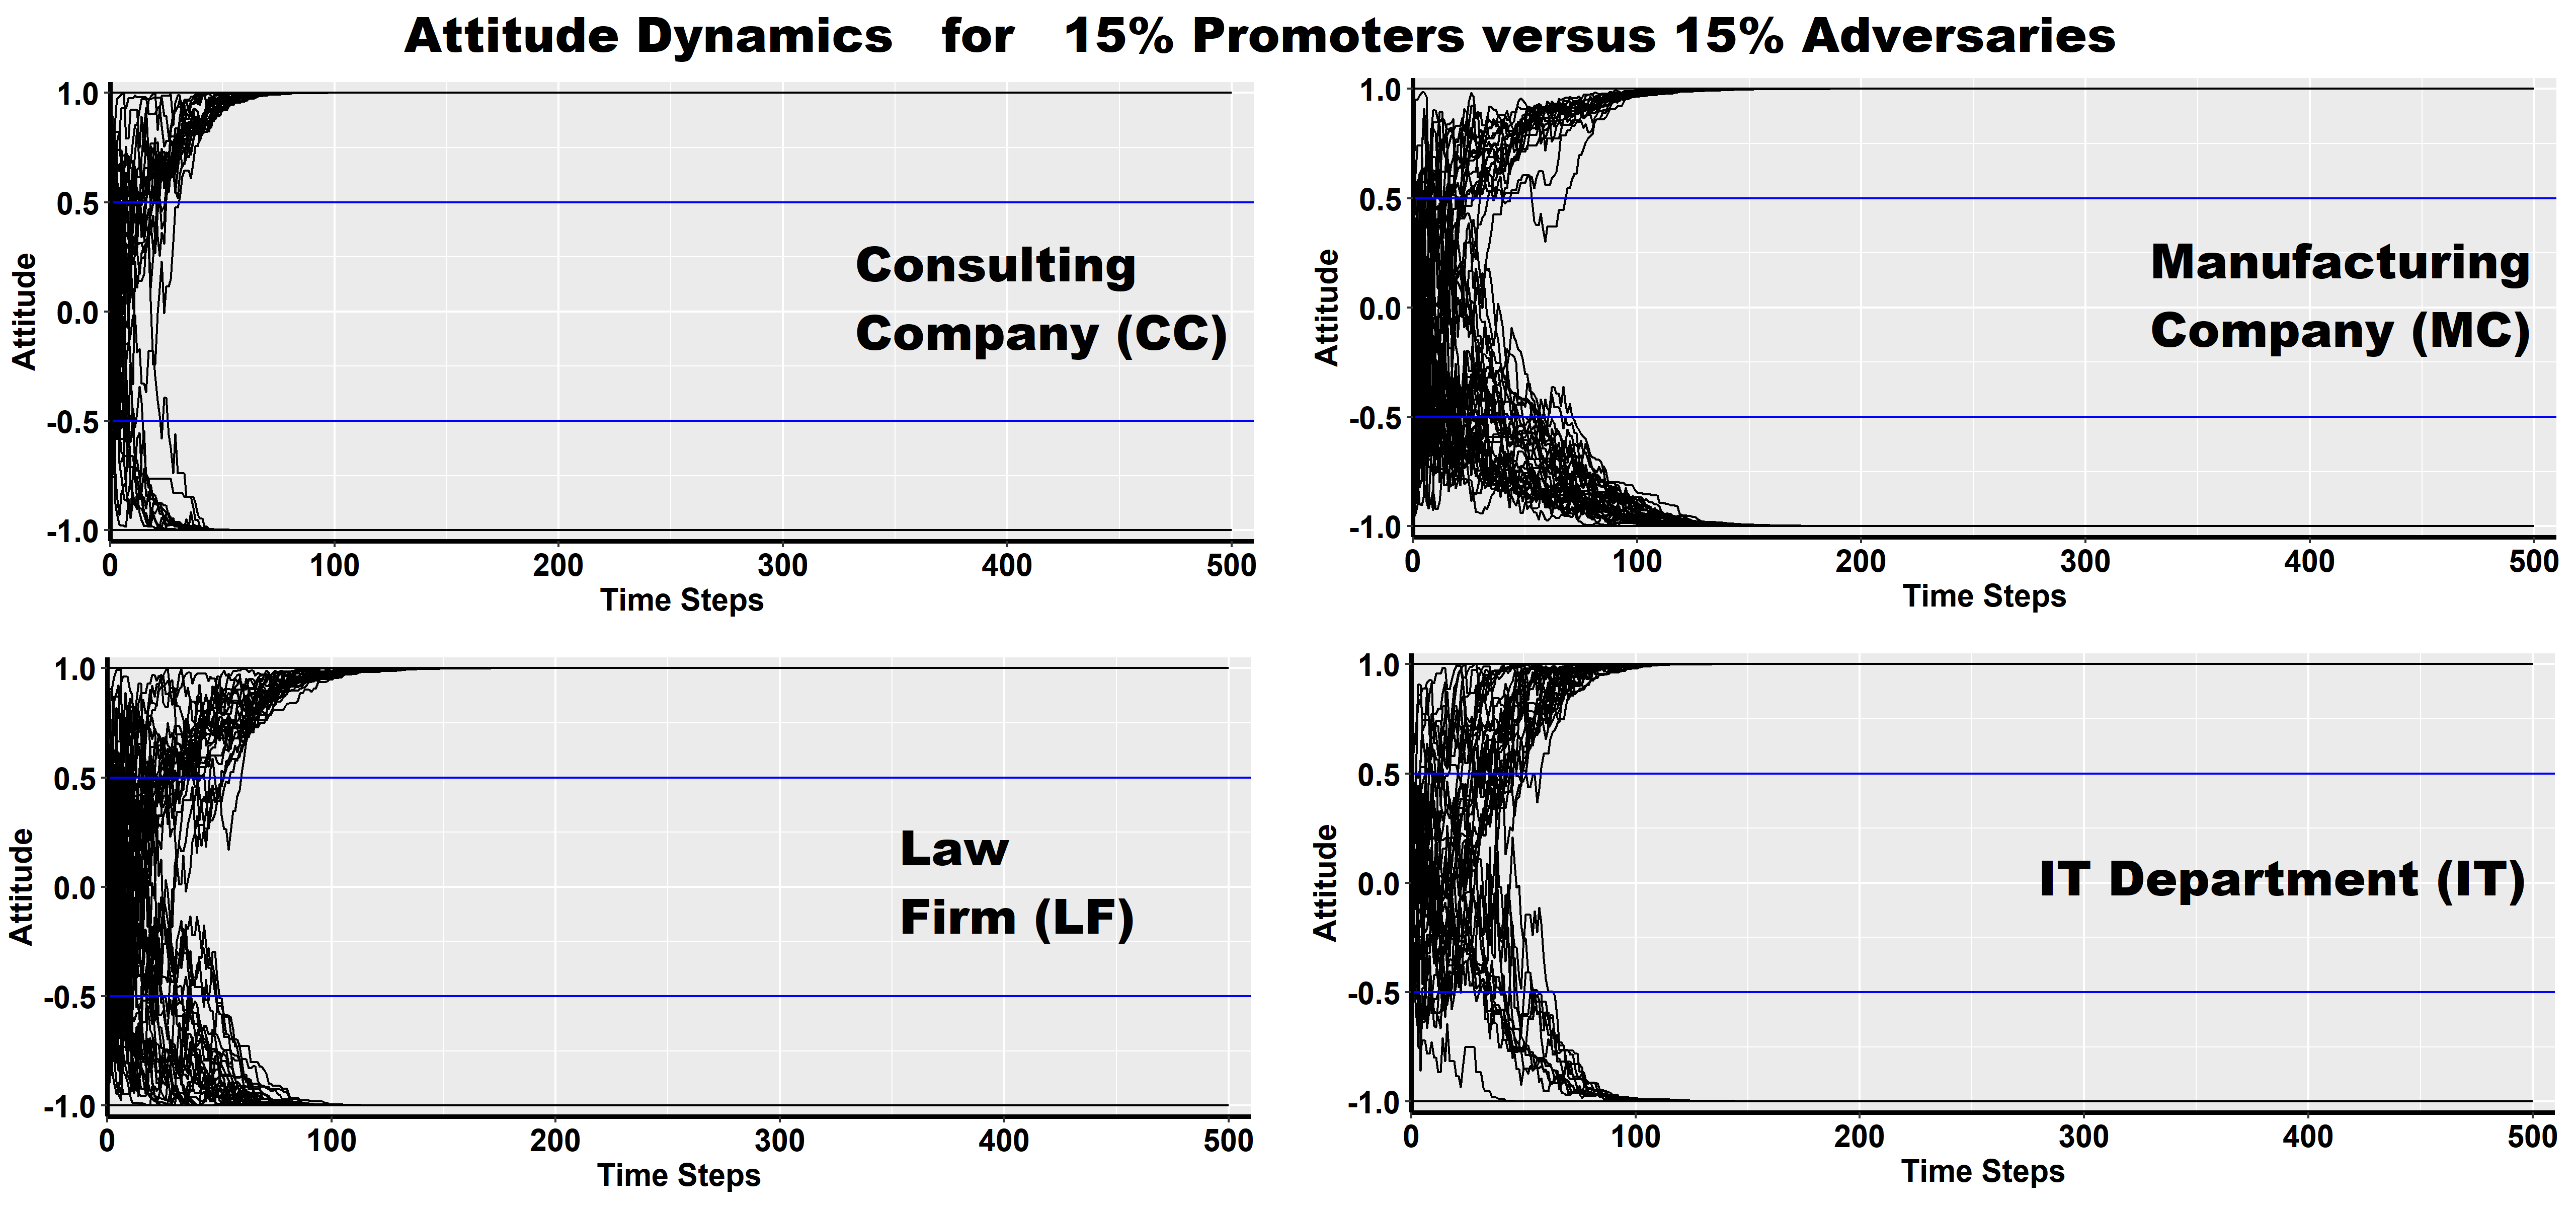

Supplement: s1 [file s1 › supplementary/SM II (Figures of AD, CAD, SLD, BD)/15% vs 15%/AD (15% vs 15%).png]

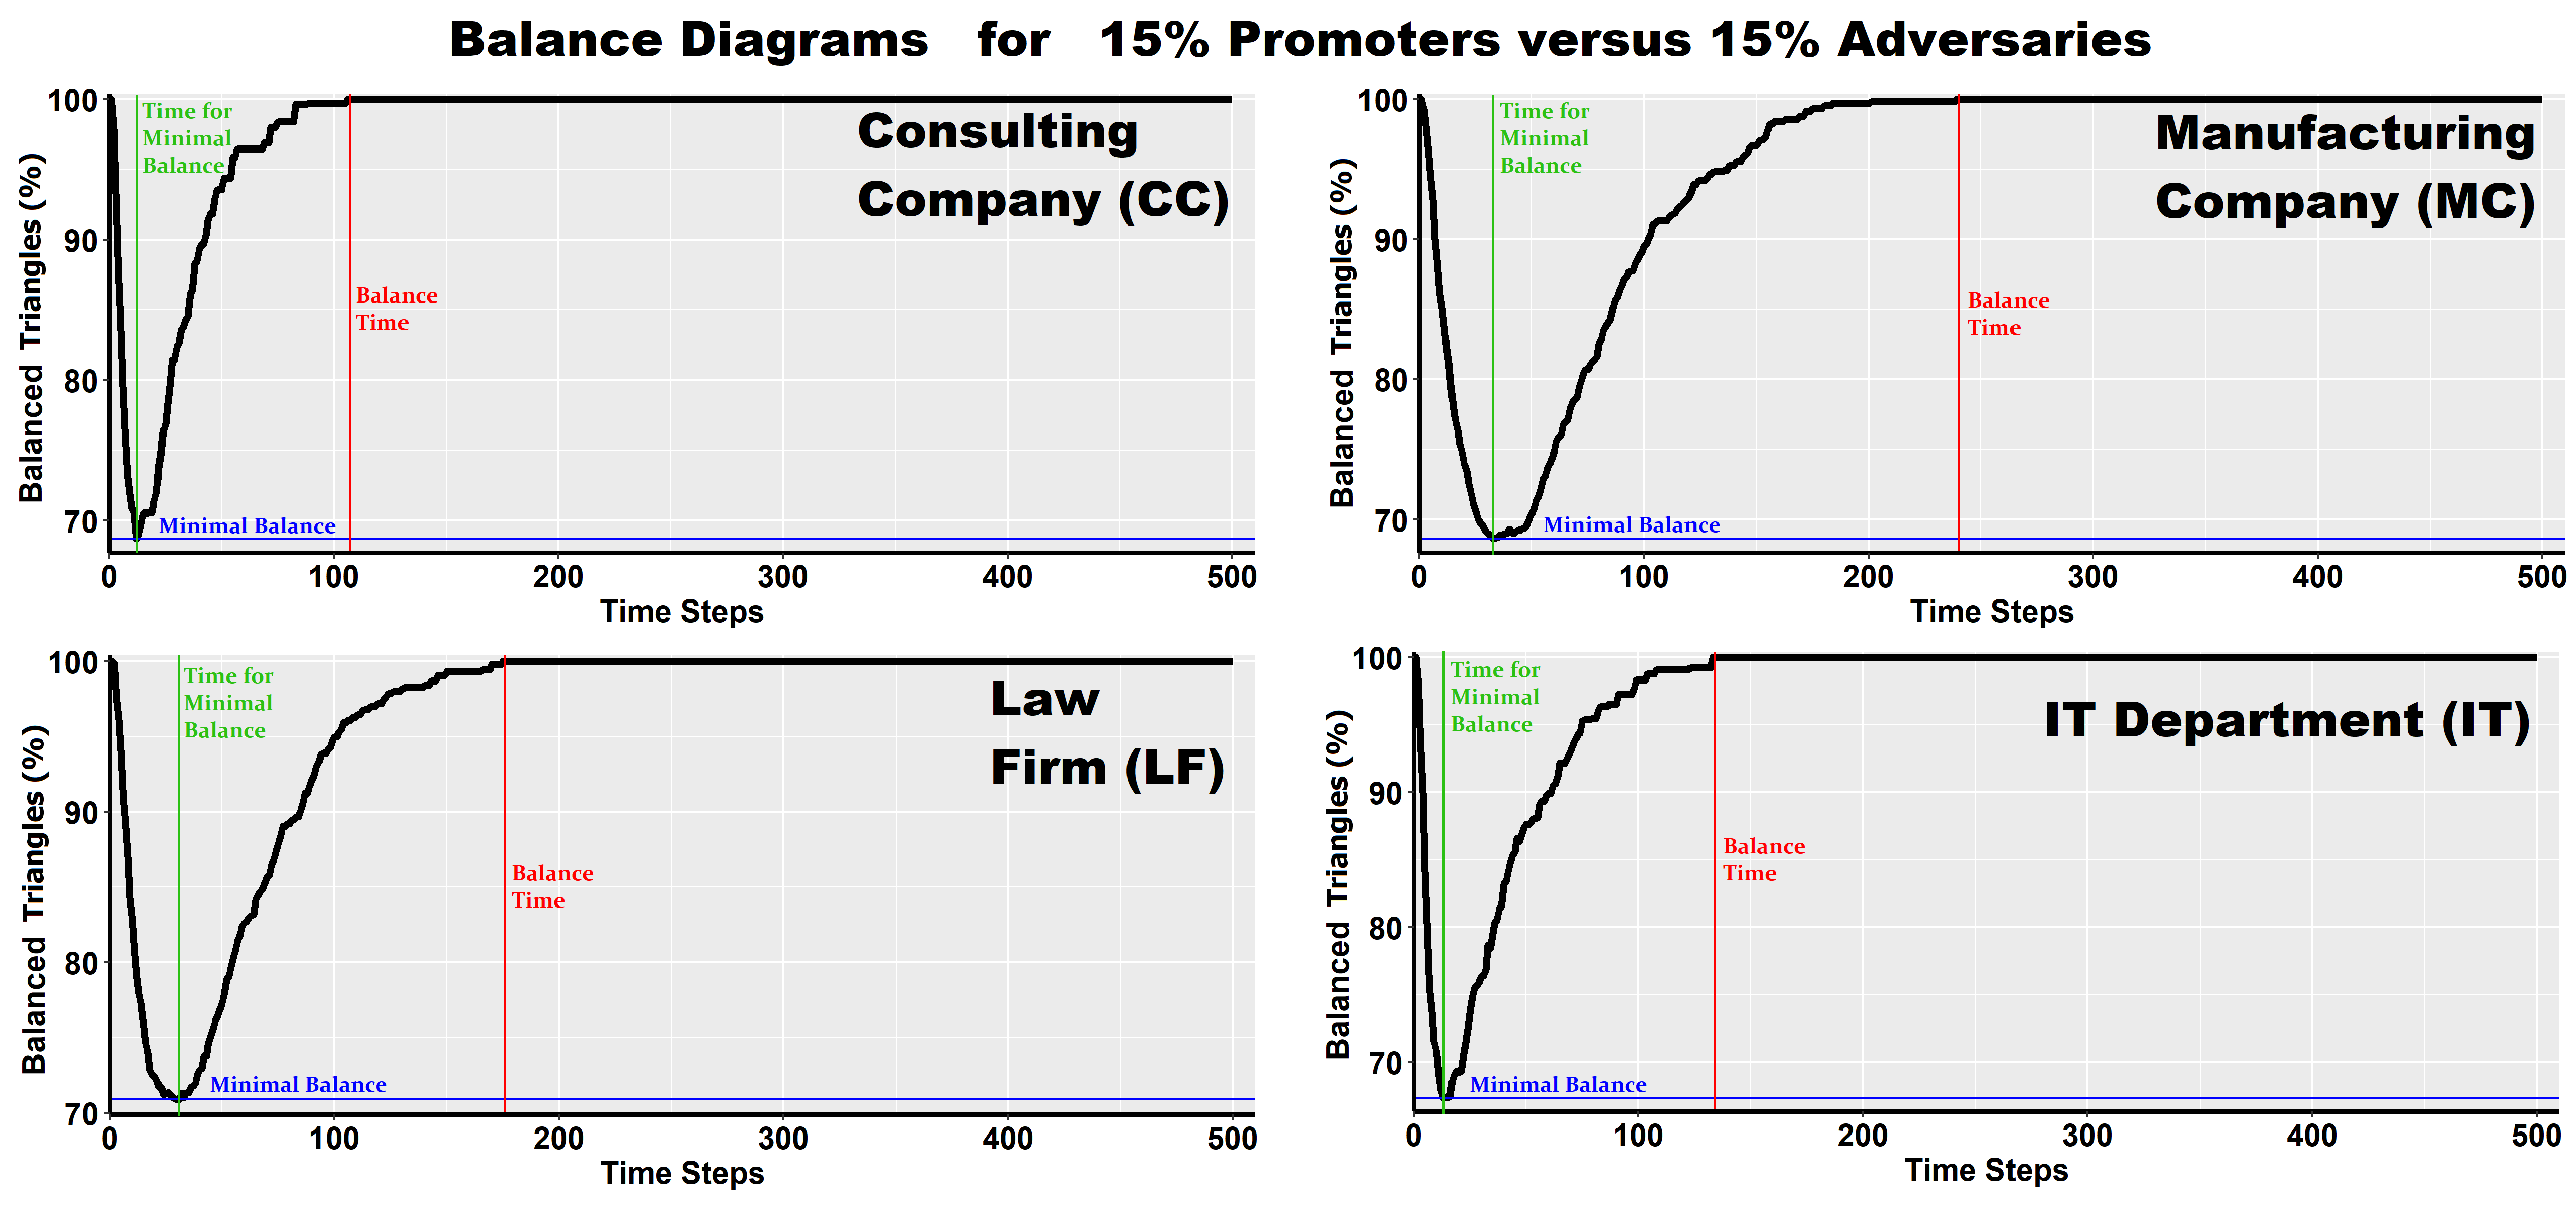

Supplement: s1 [file s1 › supplementary/SM II (Figures of AD, CAD, SLD, BD)/15% vs 15%/BD (15% vs 15%).png]

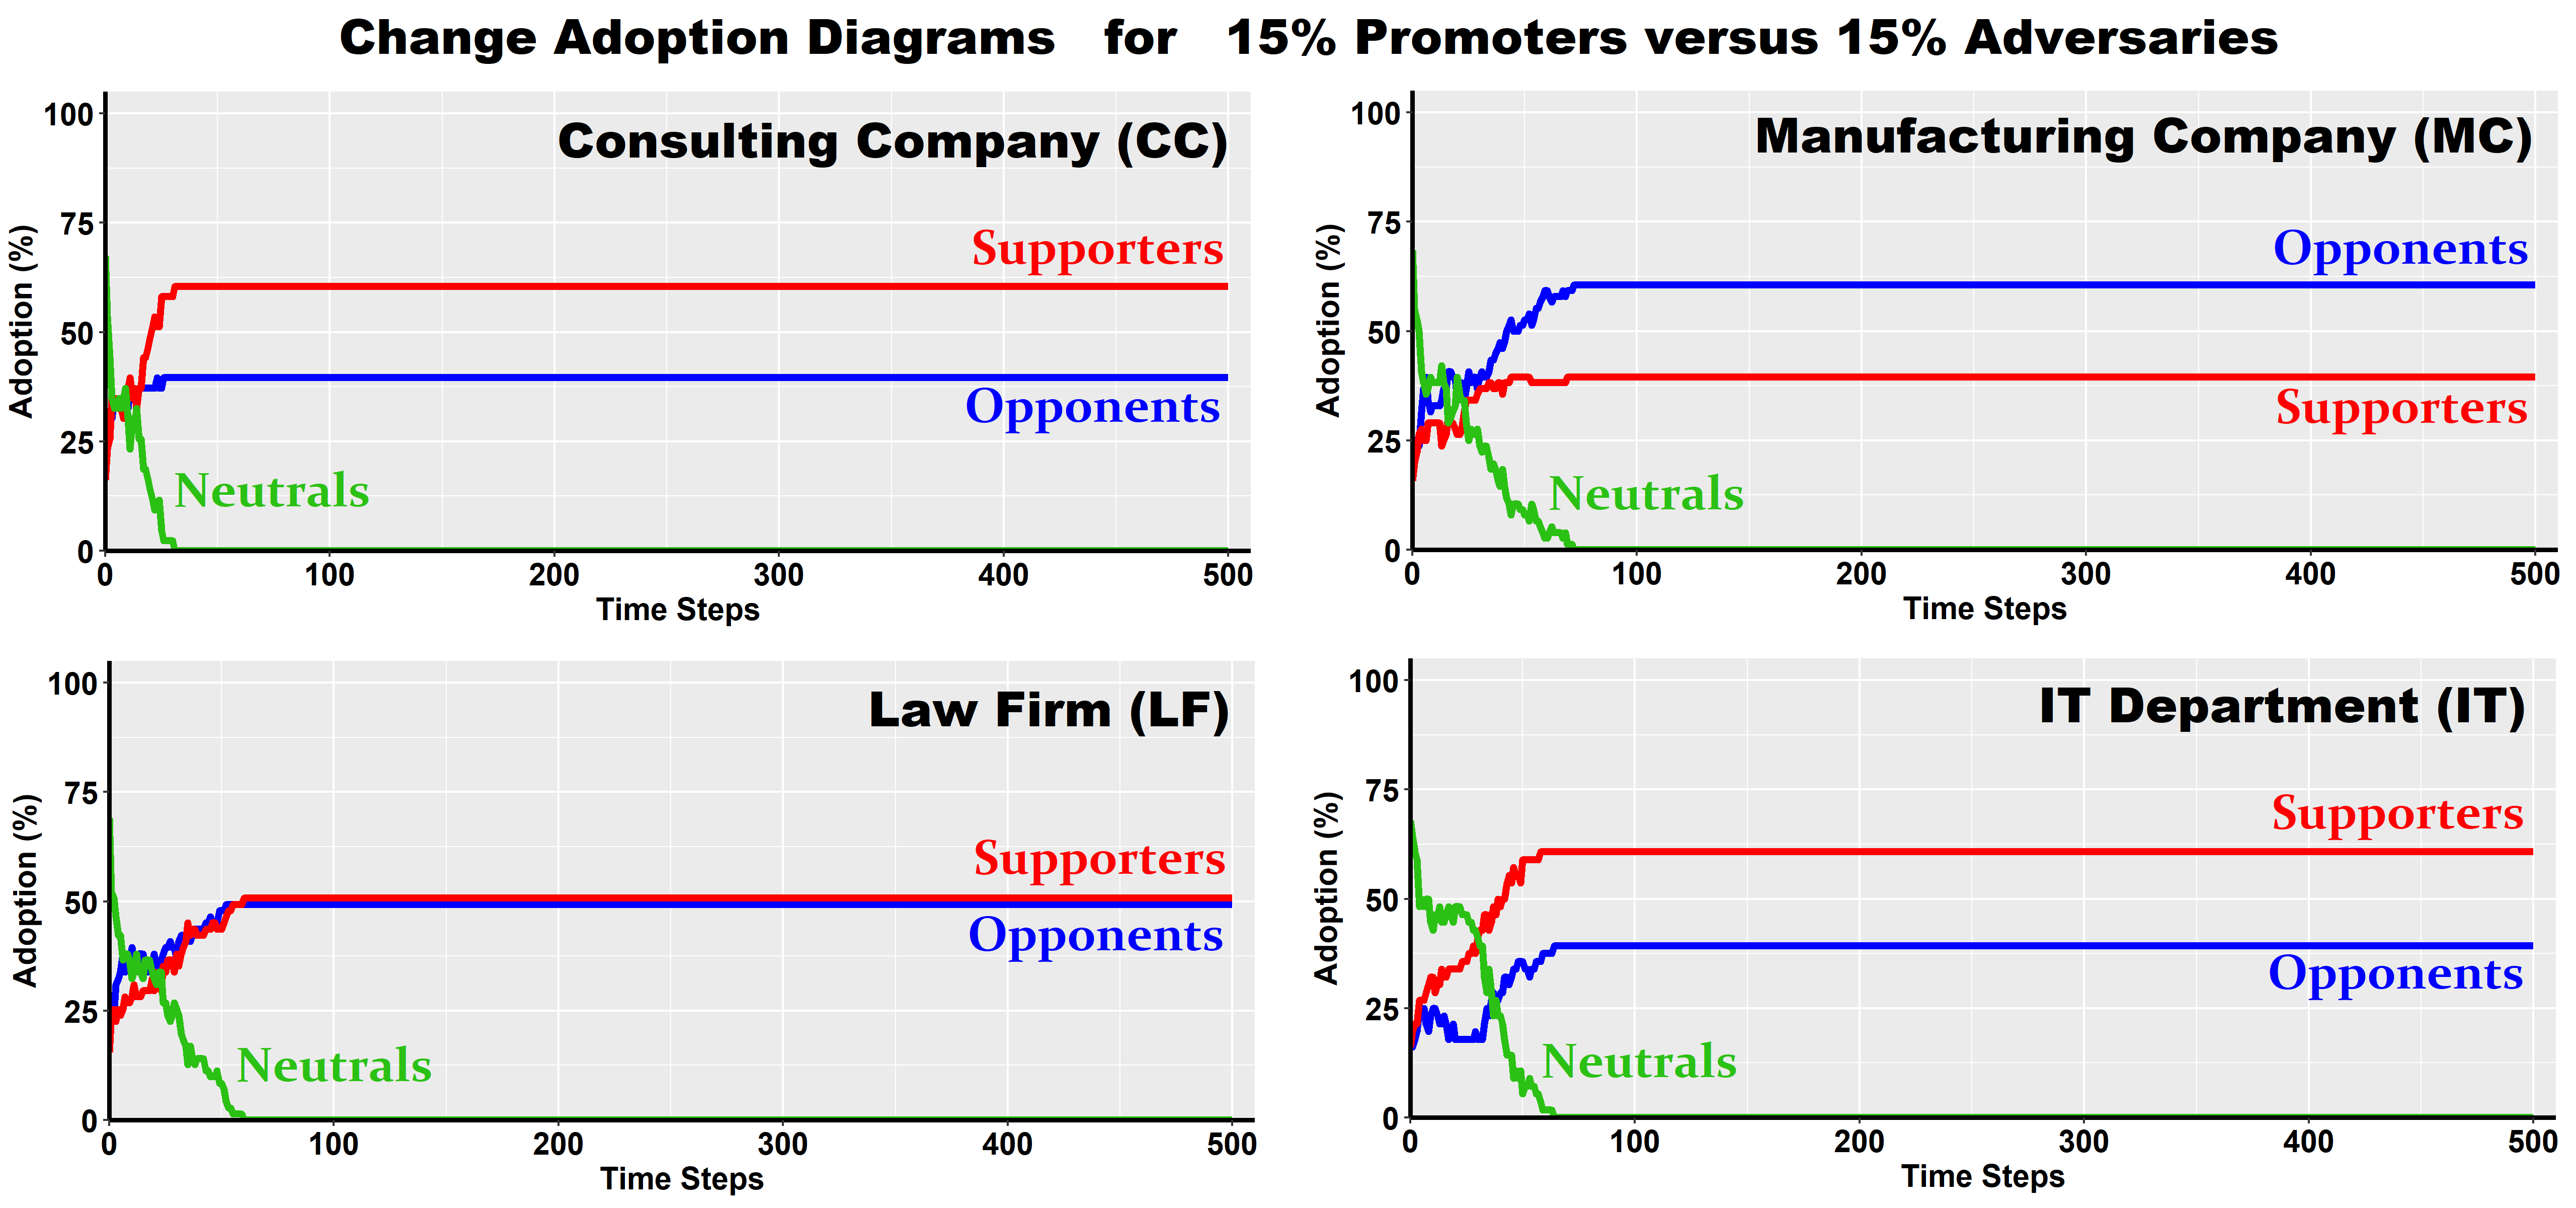

Supplement: s1 [file s1 › supplementary/SM II (Figures of AD, CAD, SLD, BD)/15% vs 15%/CAD (15% vs 15%).png]

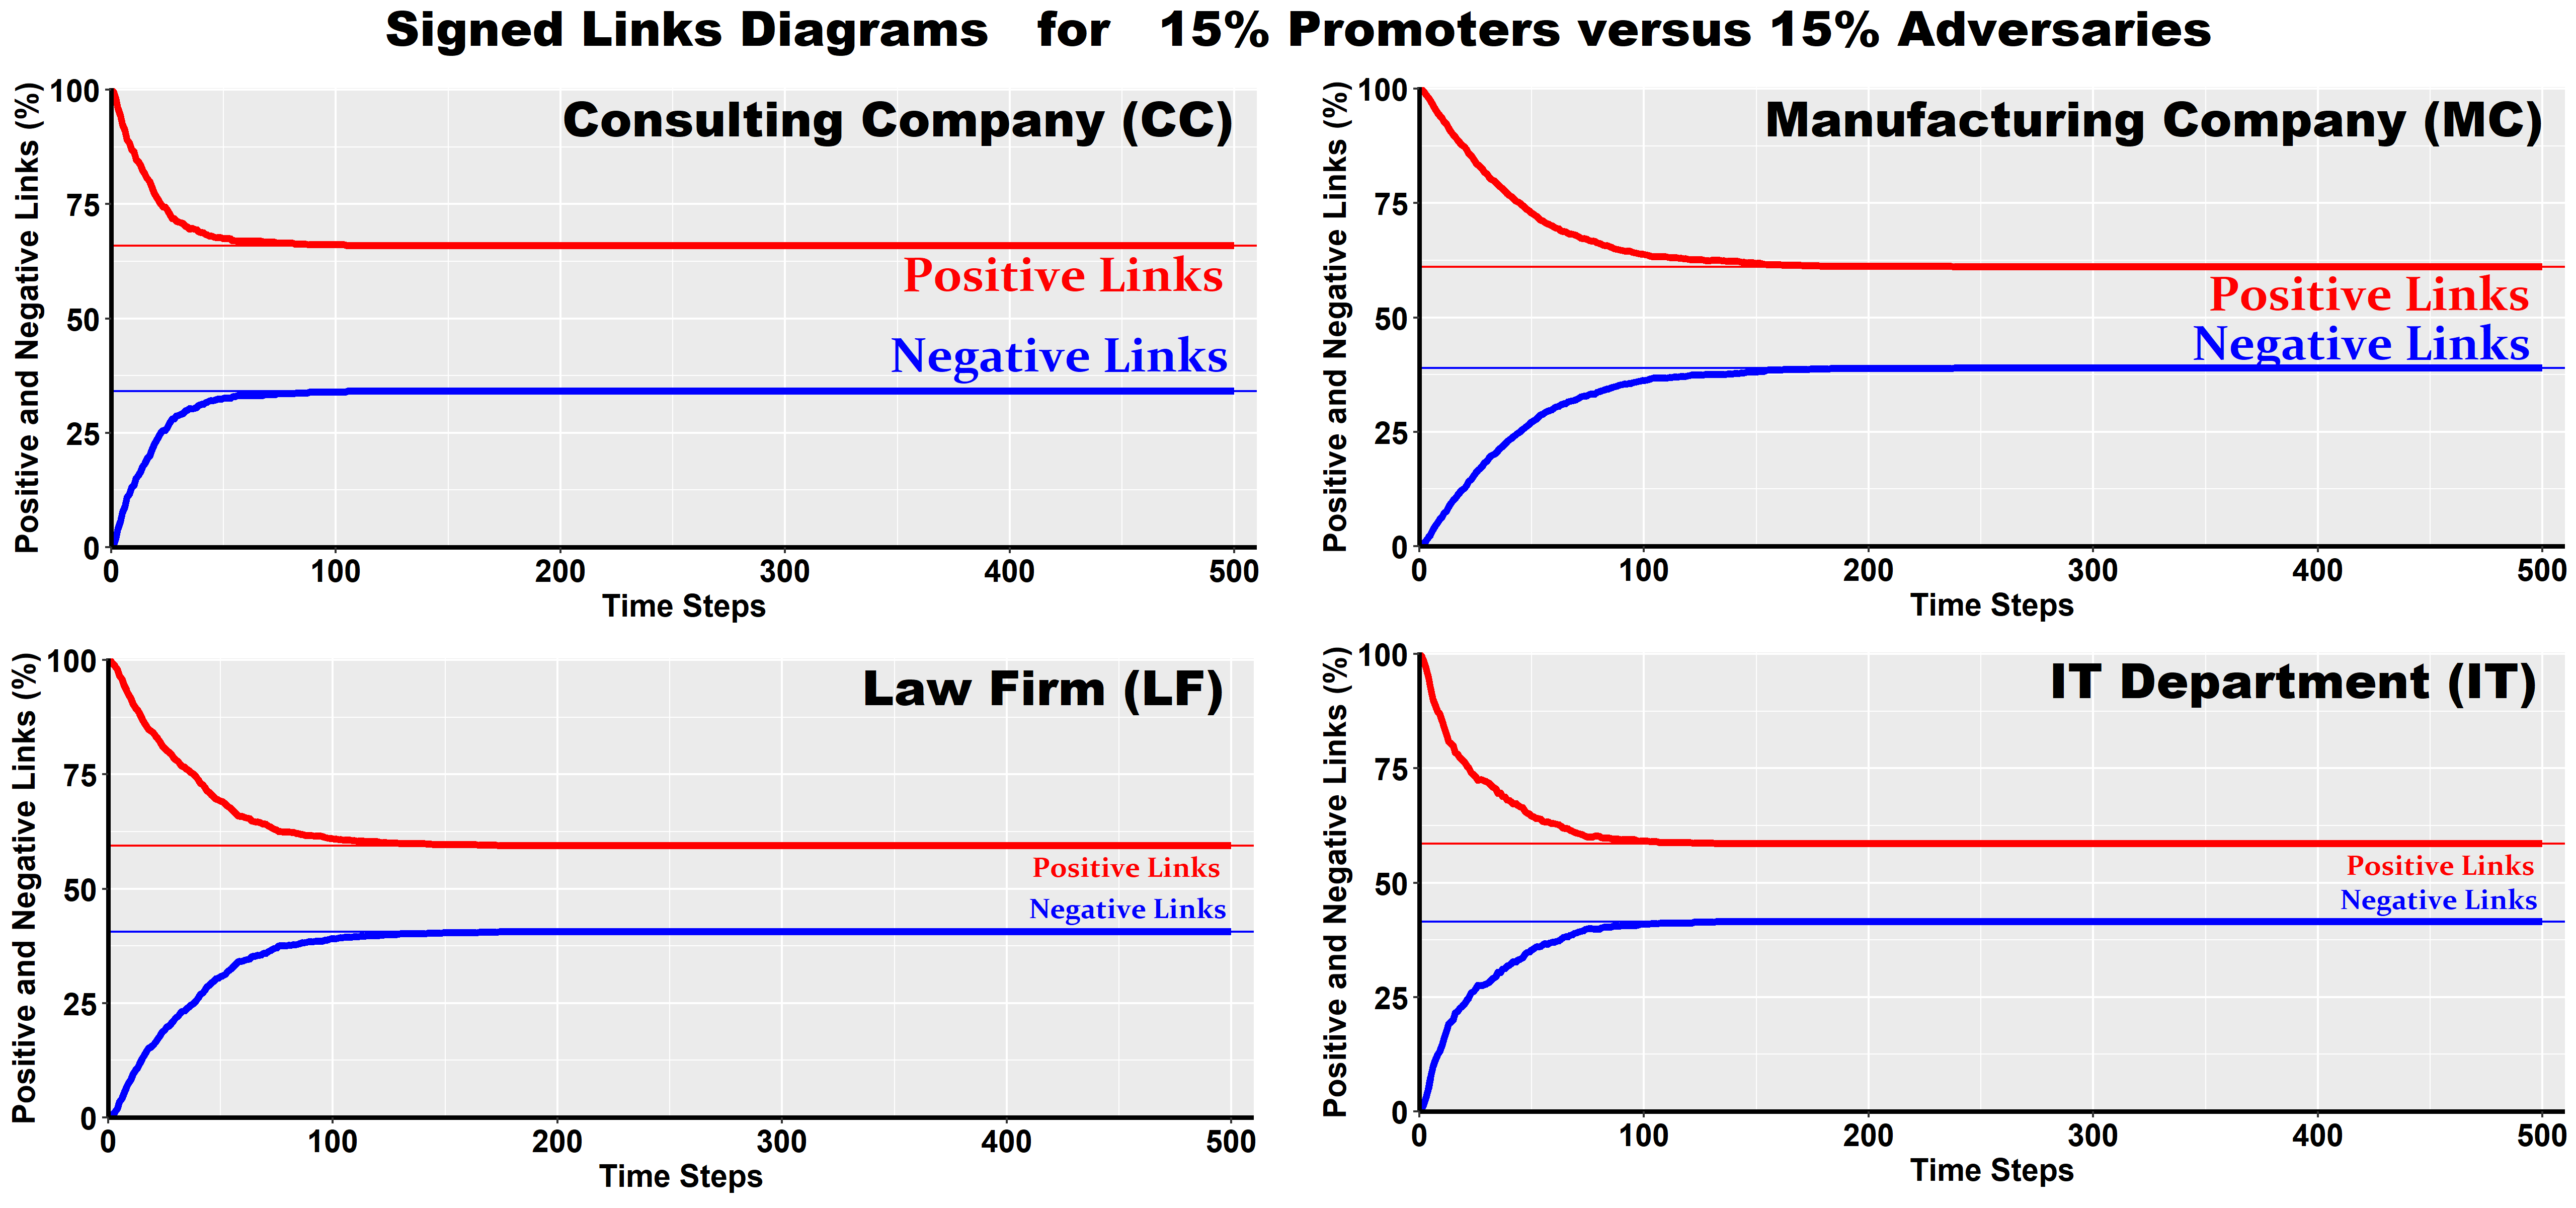

Supplement: s1 [file s1 › supplementary/SM II (Figures of AD, CAD, SLD, BD)/15% vs 15%/SLD (15% vs 15%).png]

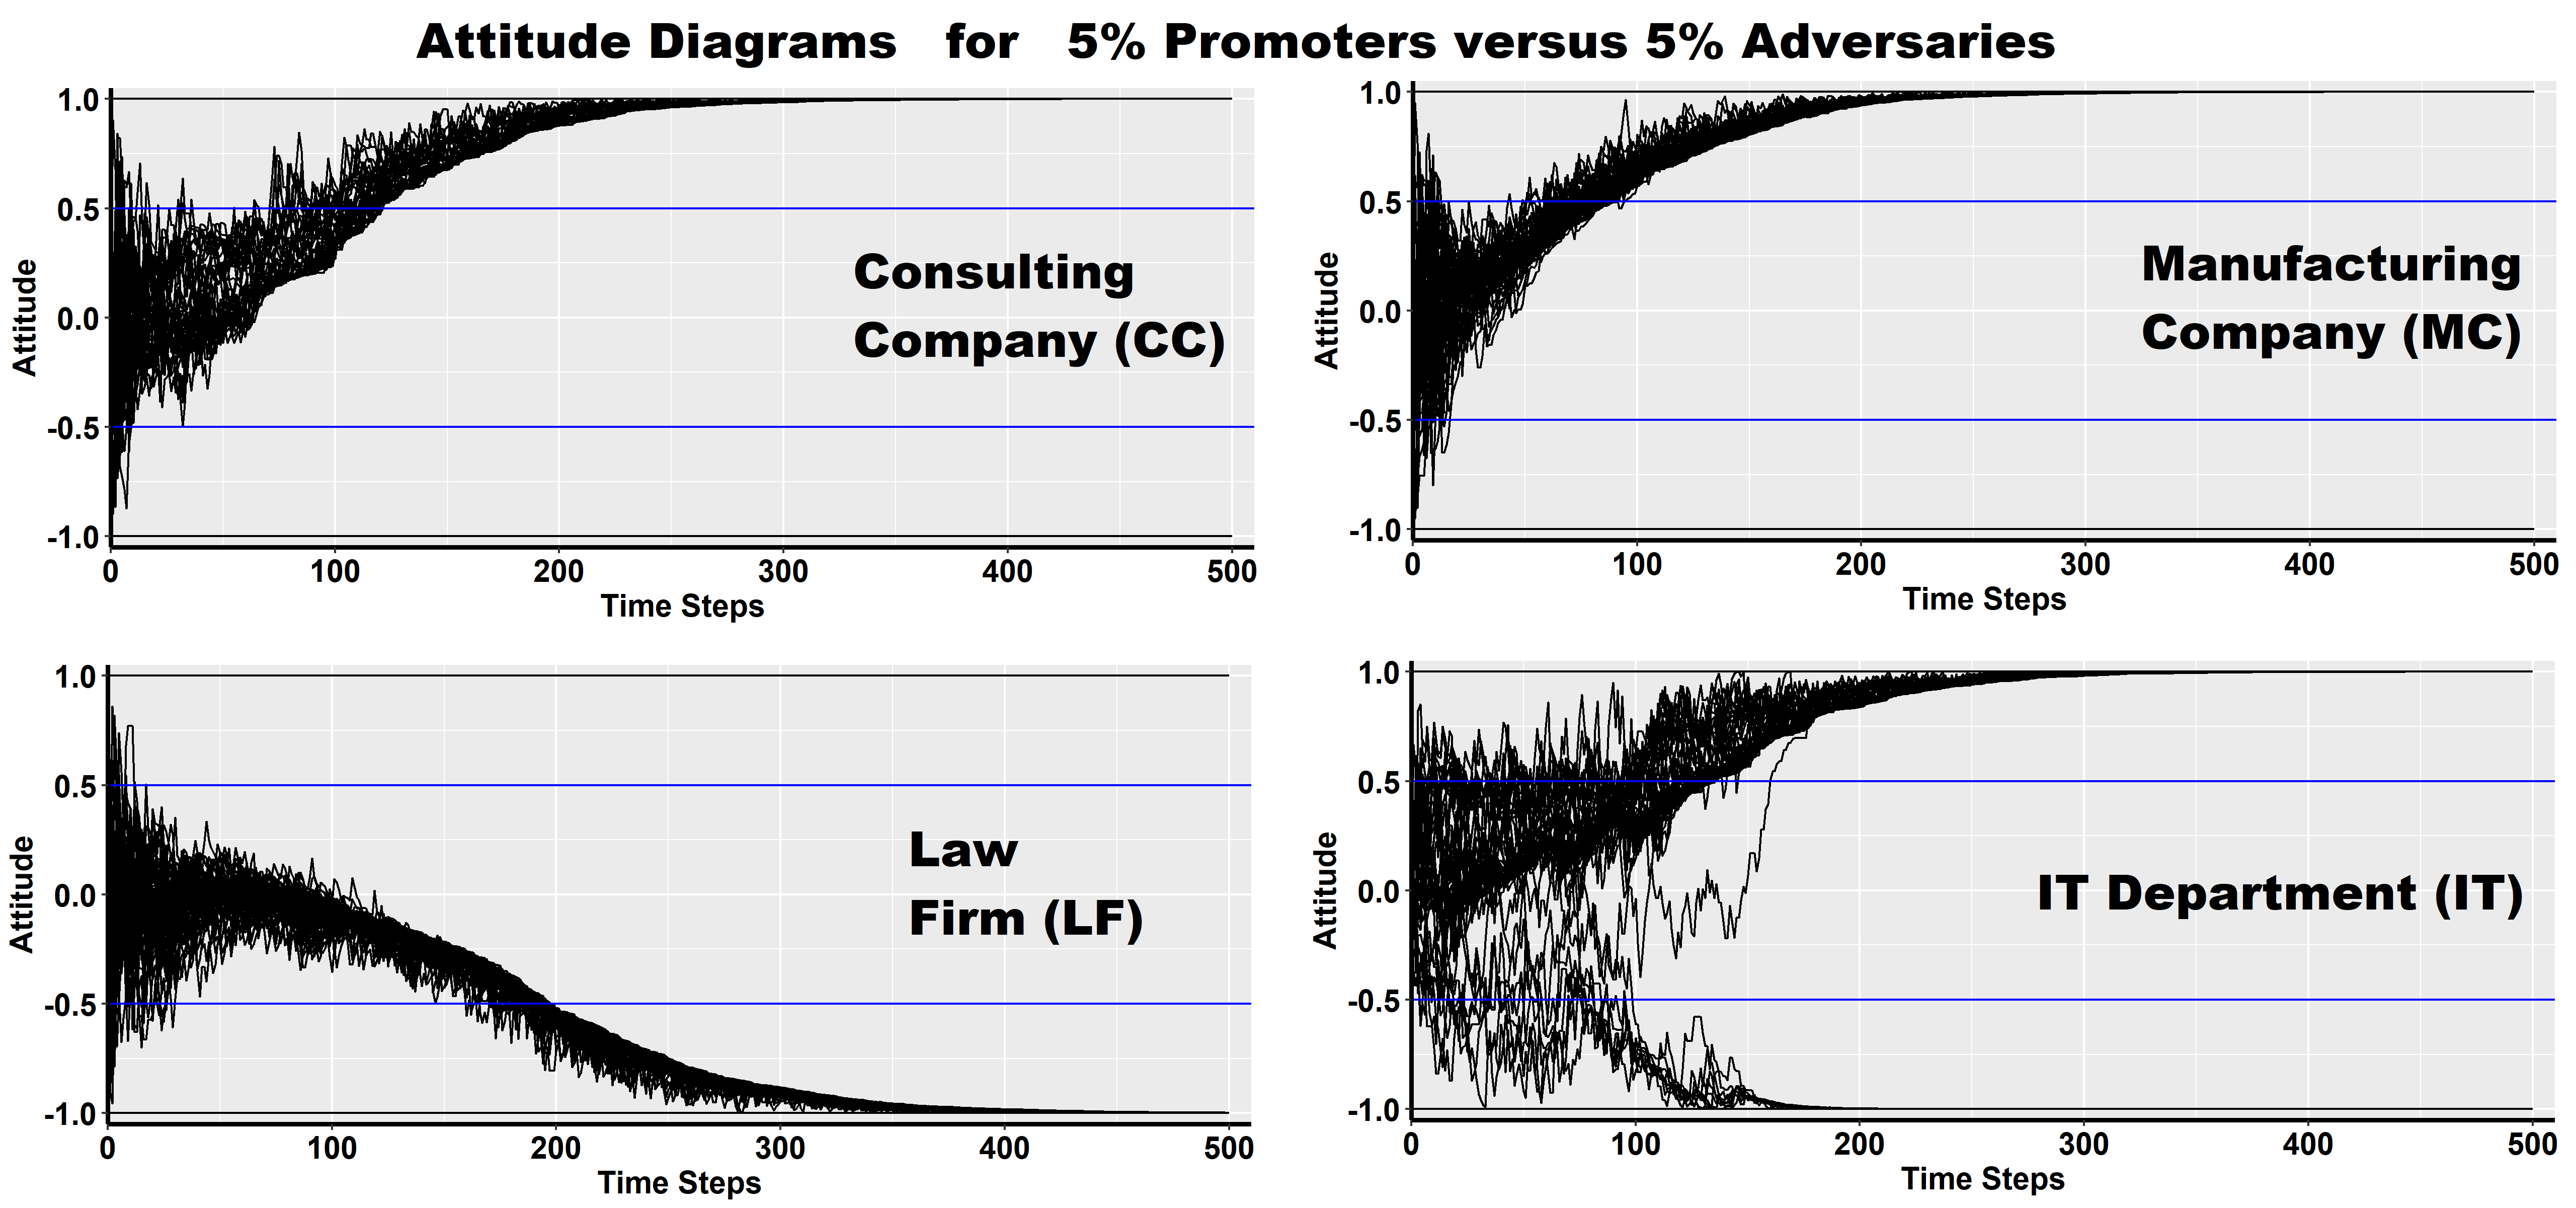

Supplement: s1 [file s1 › supplementary/SM II (Figures of AD, CAD, SLD, BD)/5% vs 5%/AD (5% vs 5%).png]

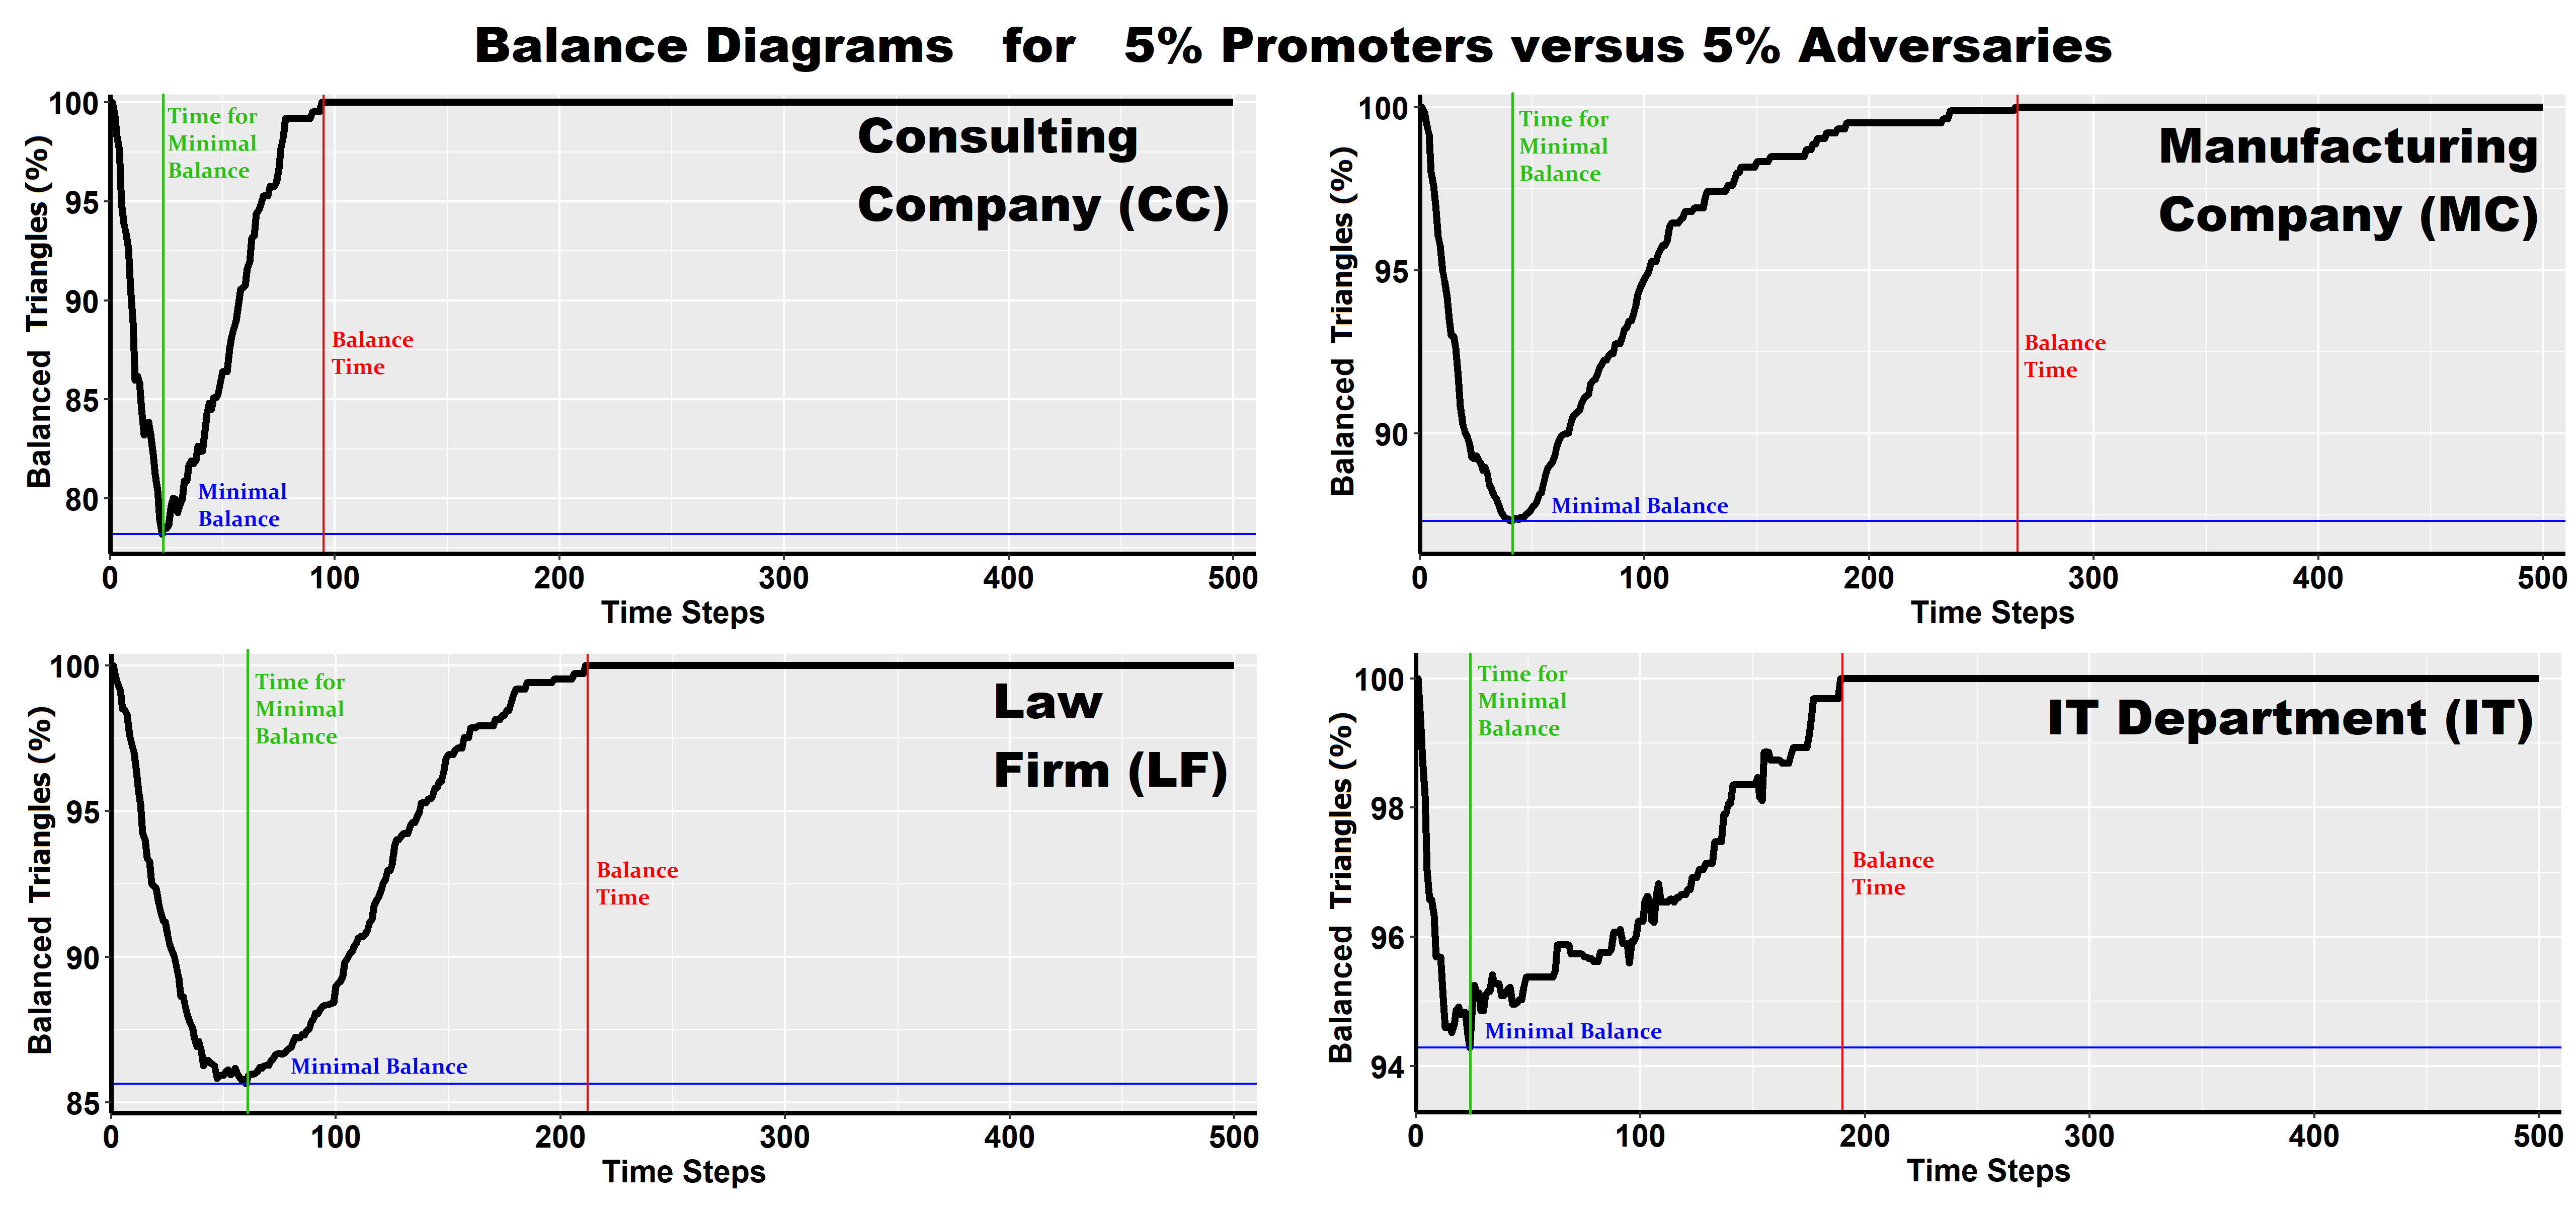

Supplement: s1 [file s1 › supplementary/SM II (Figures of AD, CAD, SLD, BD)/5% vs 5%/BD (5% vs 5%).png]

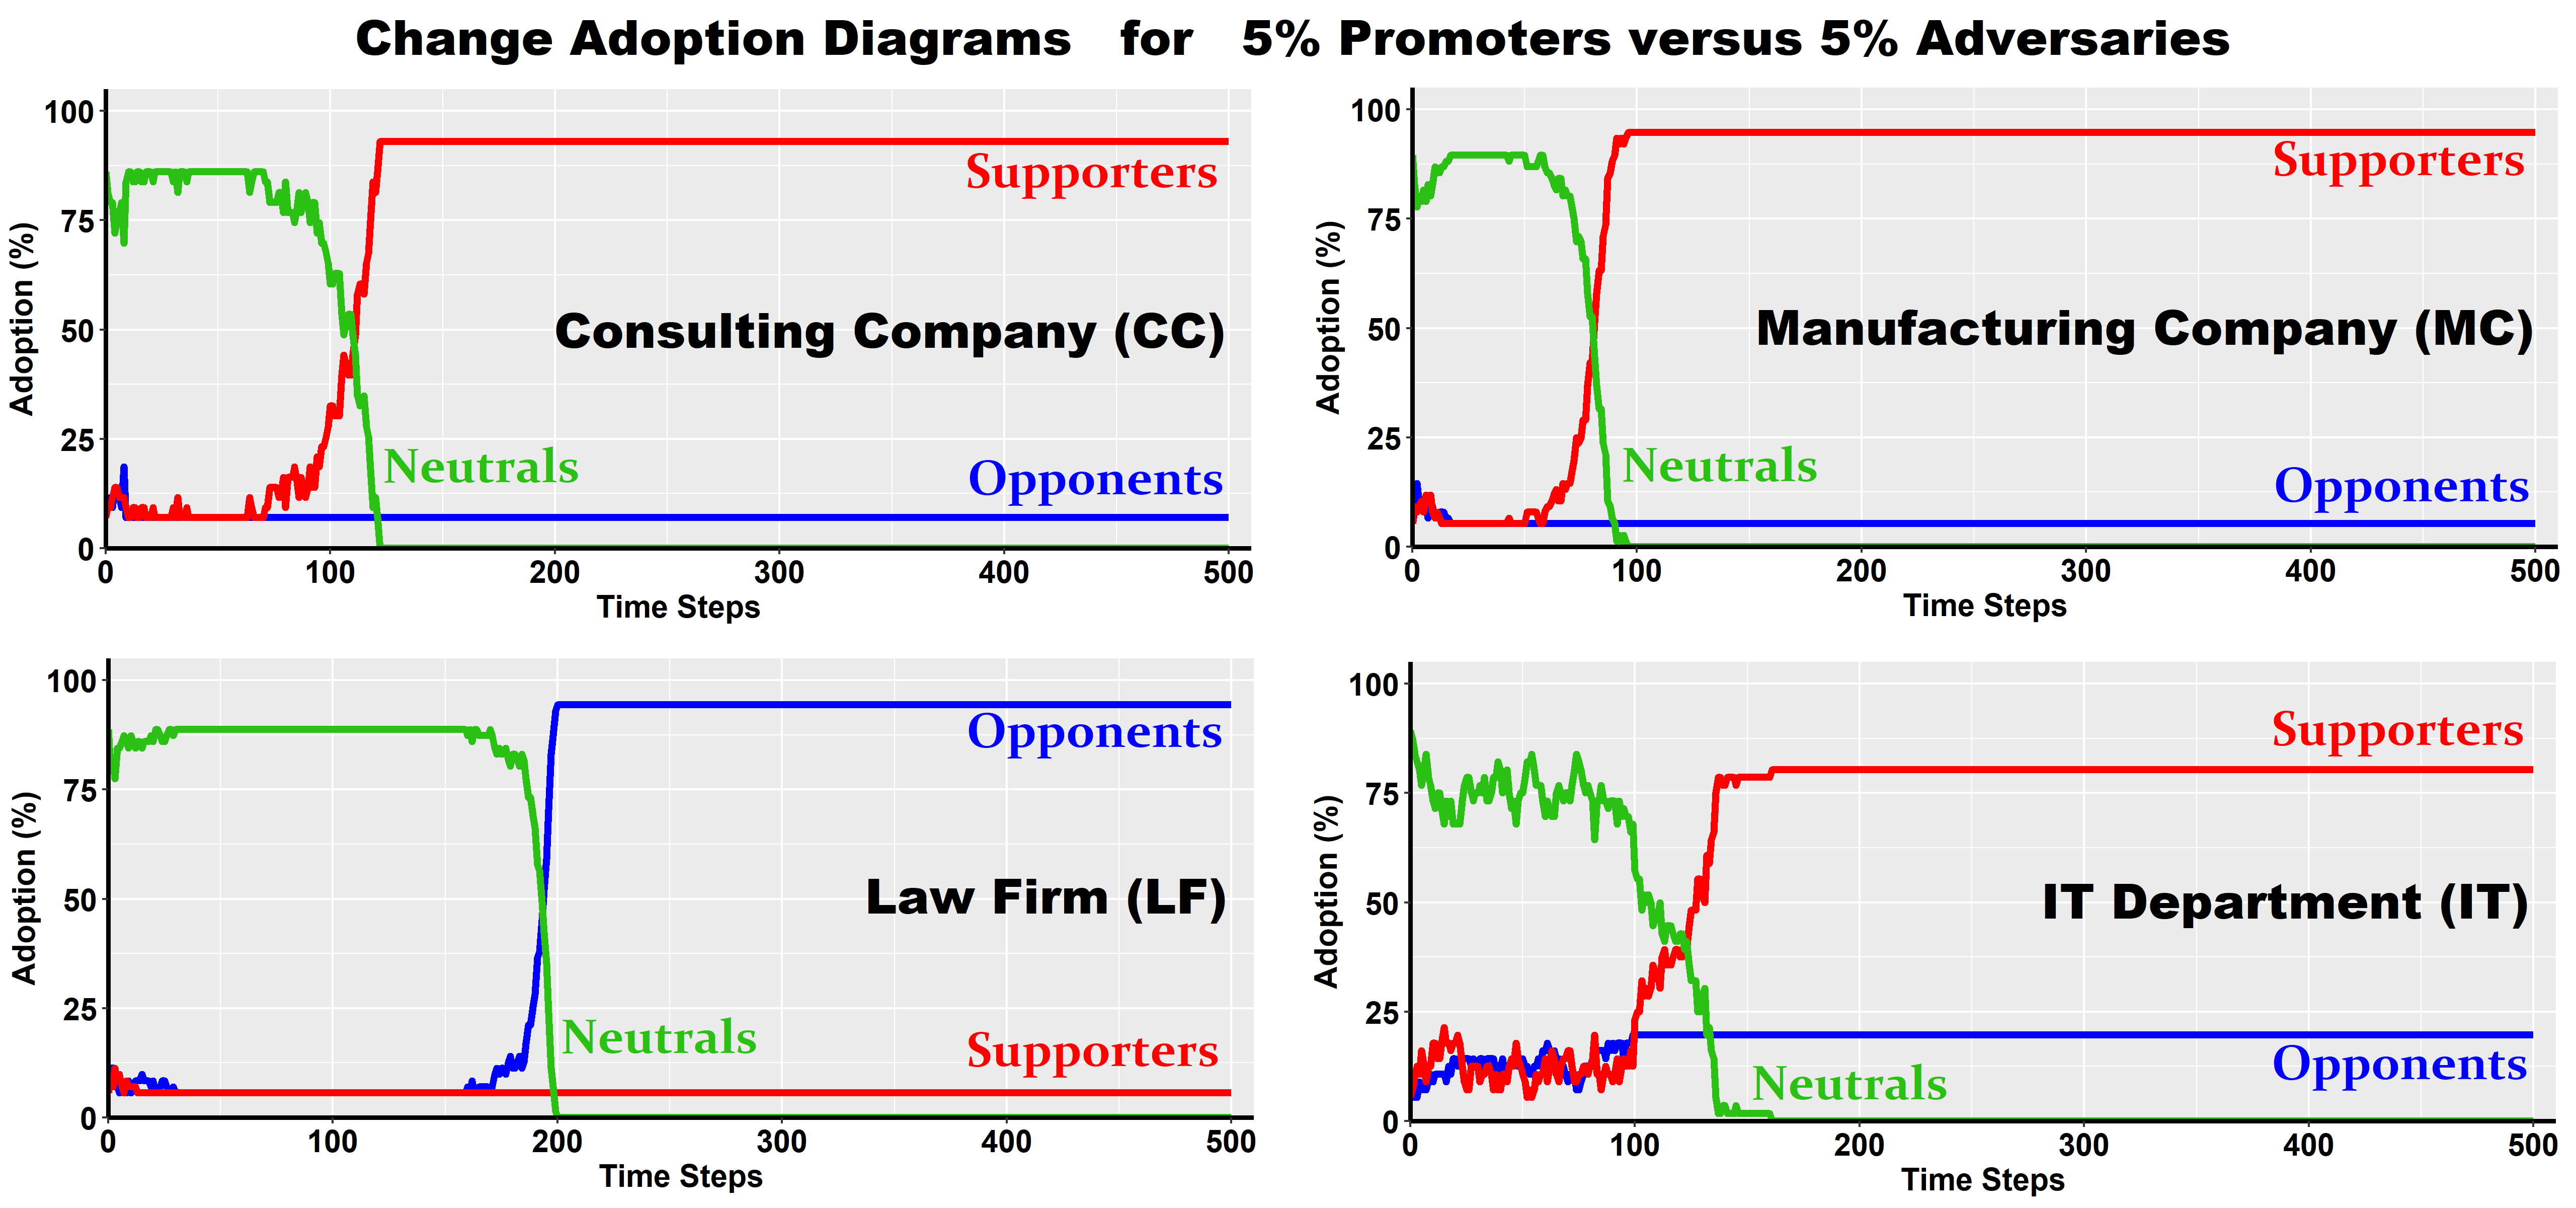

Supplement: s1 [file s1 › supplementary/SM II (Figures of AD, CAD, SLD, BD)/5% vs 5%/CAD (5% vs 5%).png]

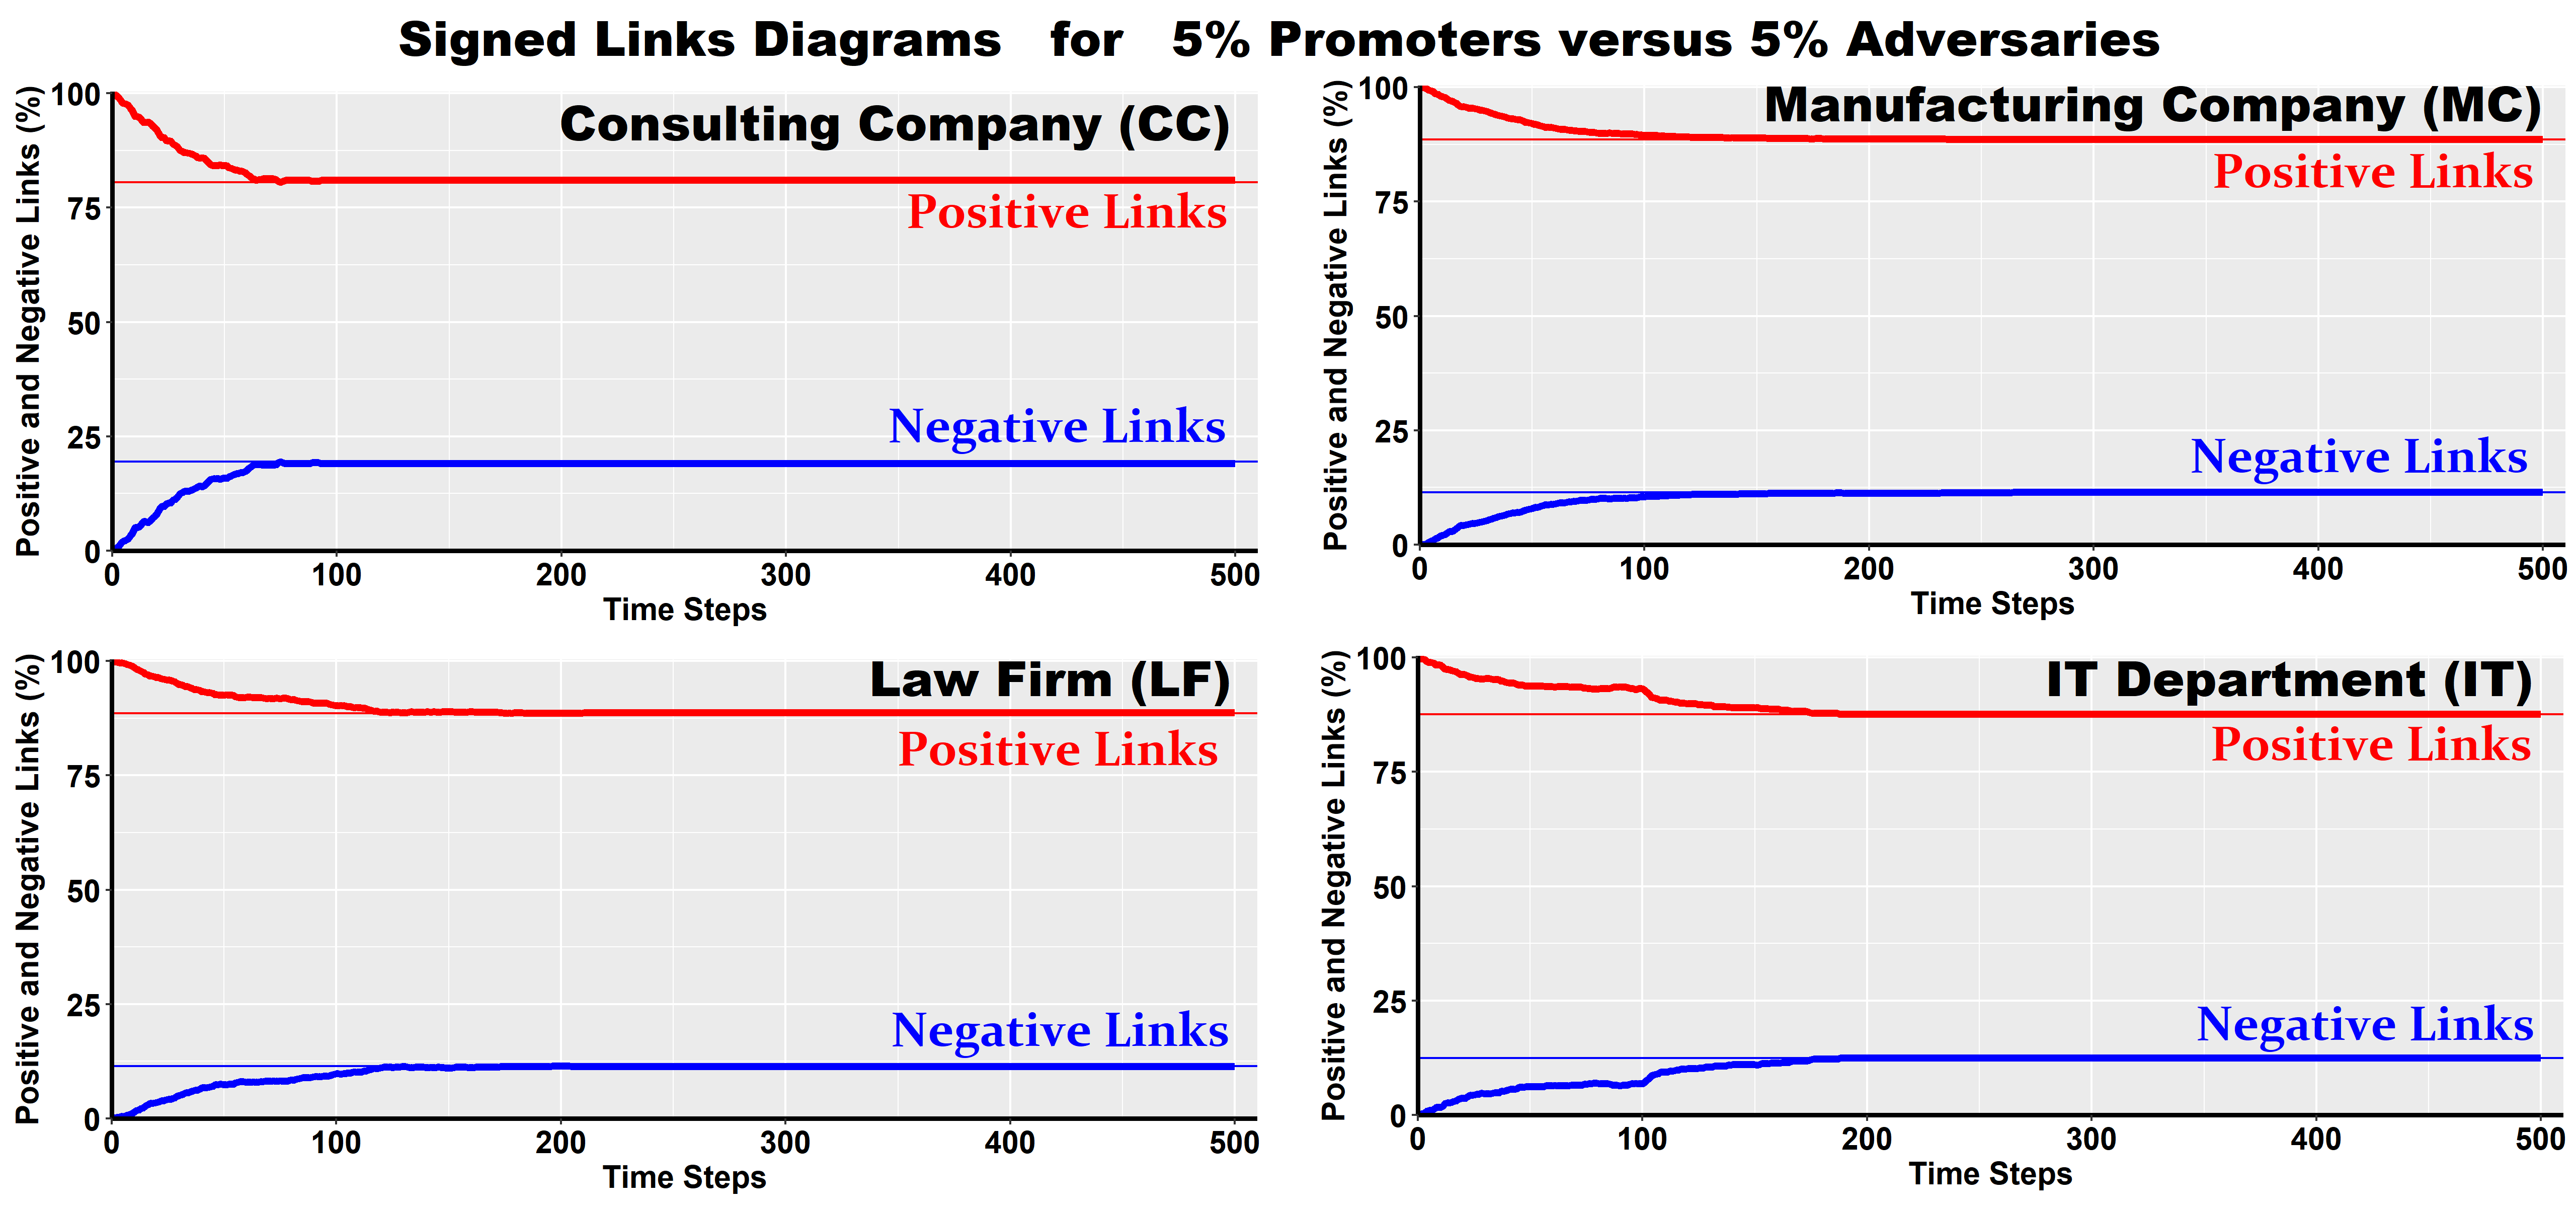

Supplement: s1 [file s1 › supplementary/SM II (Figures of AD, CAD, SLD, BD)/5% vs 5%/SLD (5% vs 5%).png]

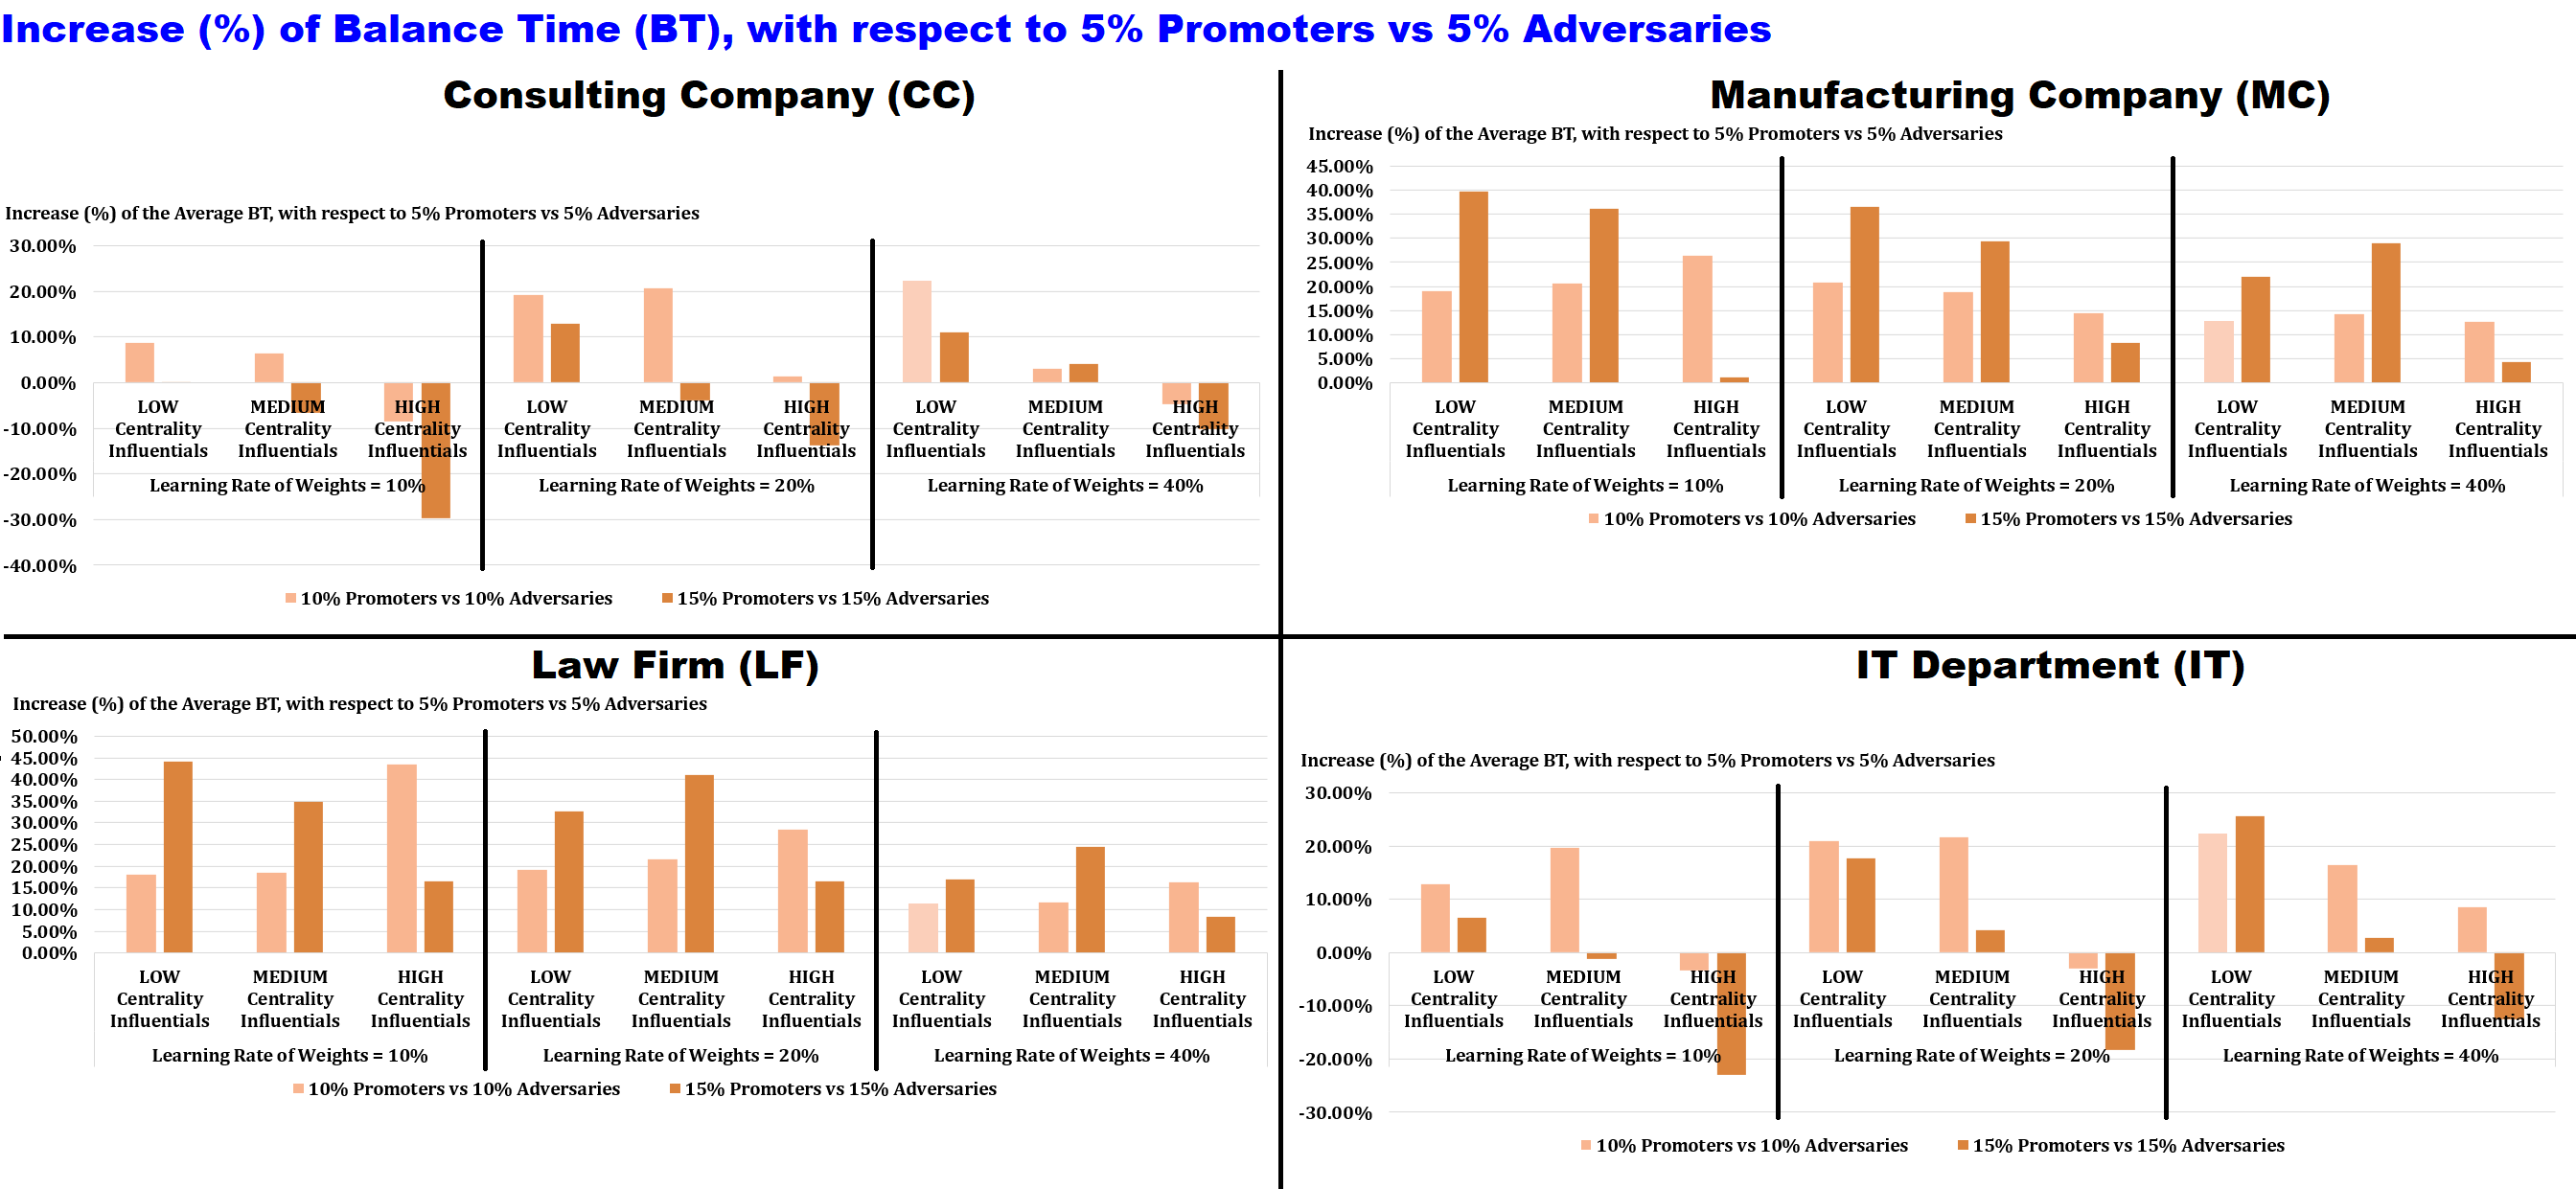

Supplement: s1 [file s1 › supplementary/SM IV (Figures of FPL, FNL, MB, MBT, BT)/BT/BT, with respect to 5% Promoters vs 5% Adversaries (Figure SM IV.13).png]

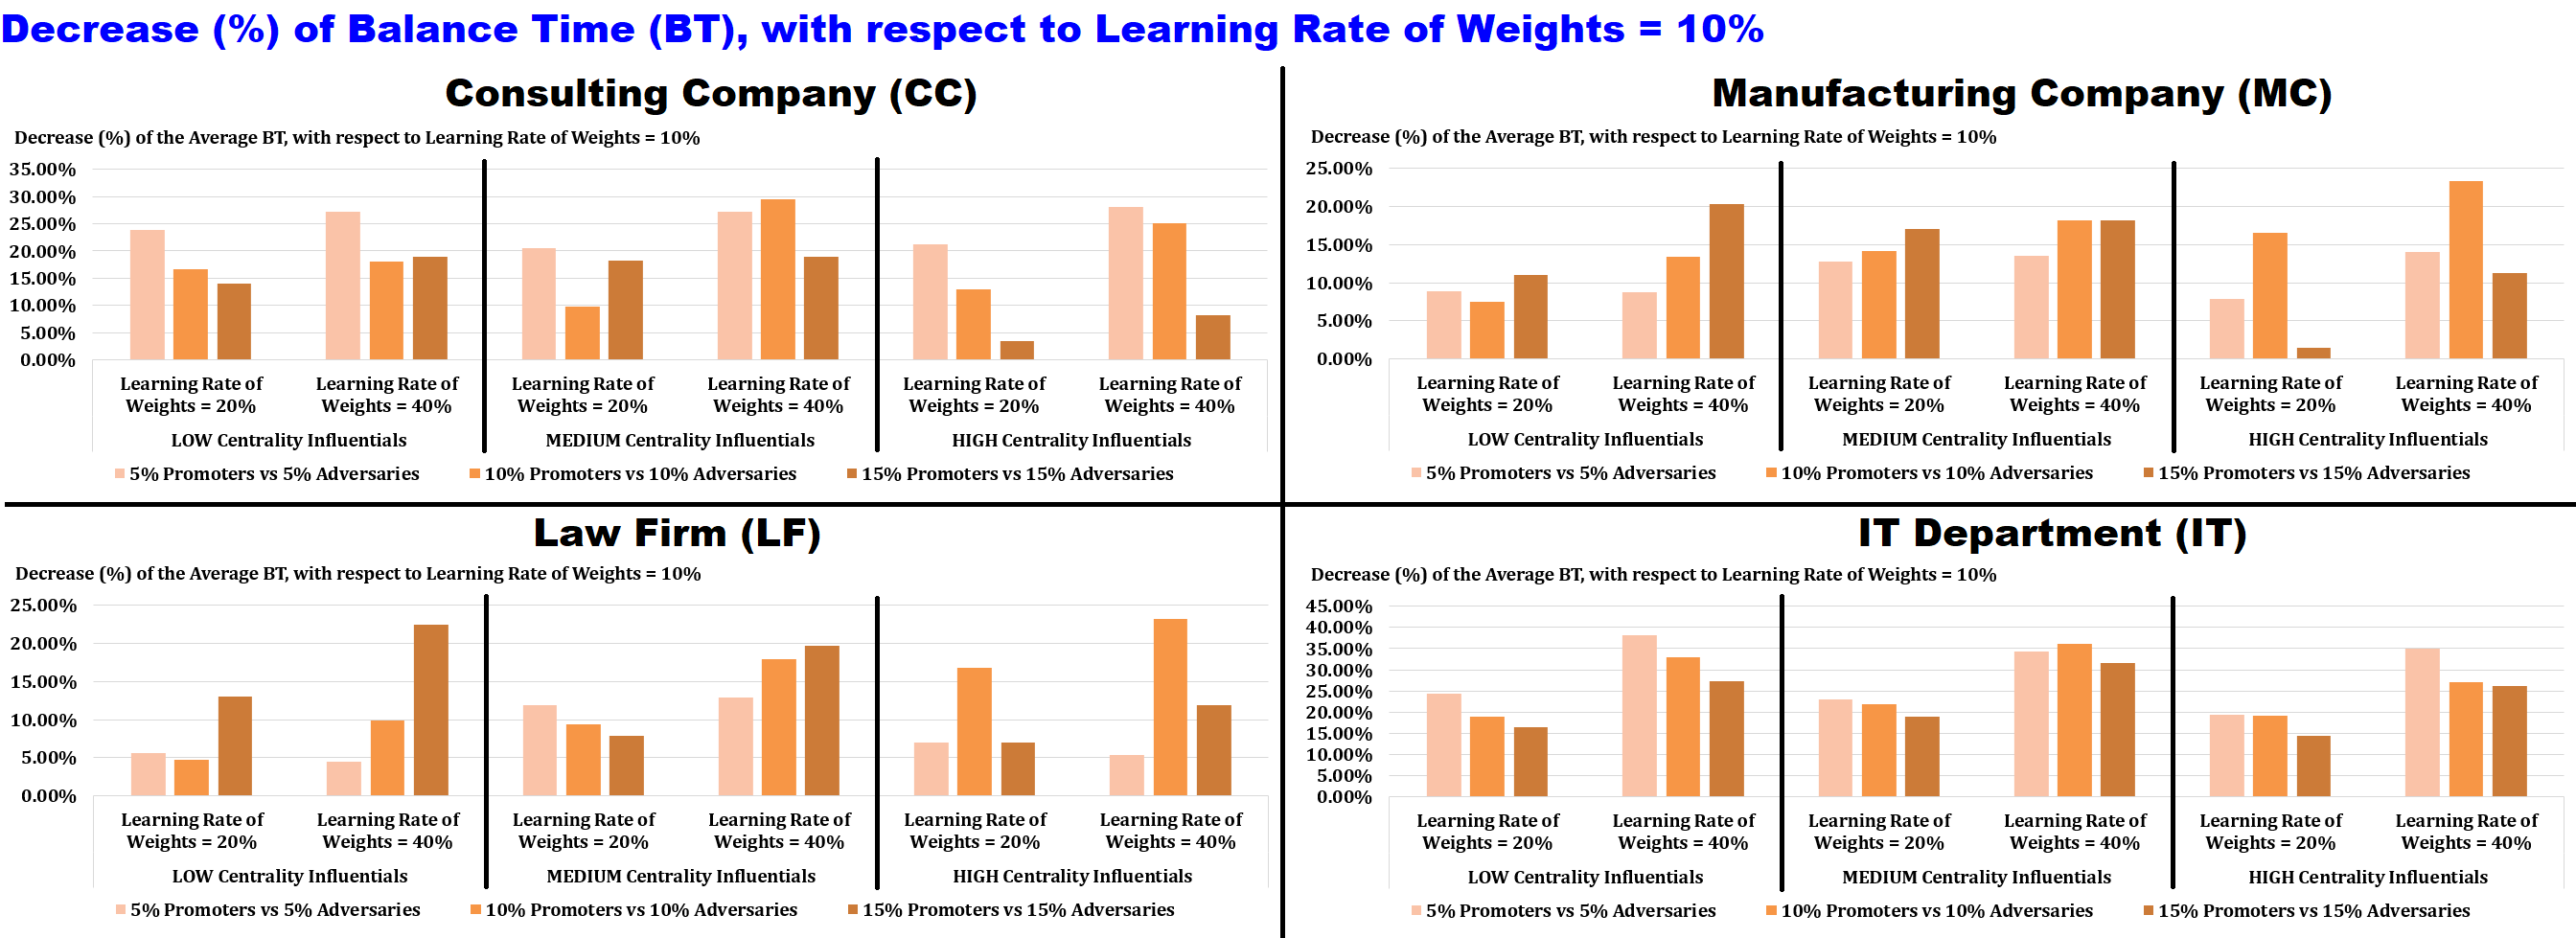

Supplement: s1 [file s1 › supplementary/SM IV (Figures of FPL, FNL, MB, MBT, BT)/BT/BT, with respect to Learning Rate of Weights = 10% (Figure SM IV.15).png]

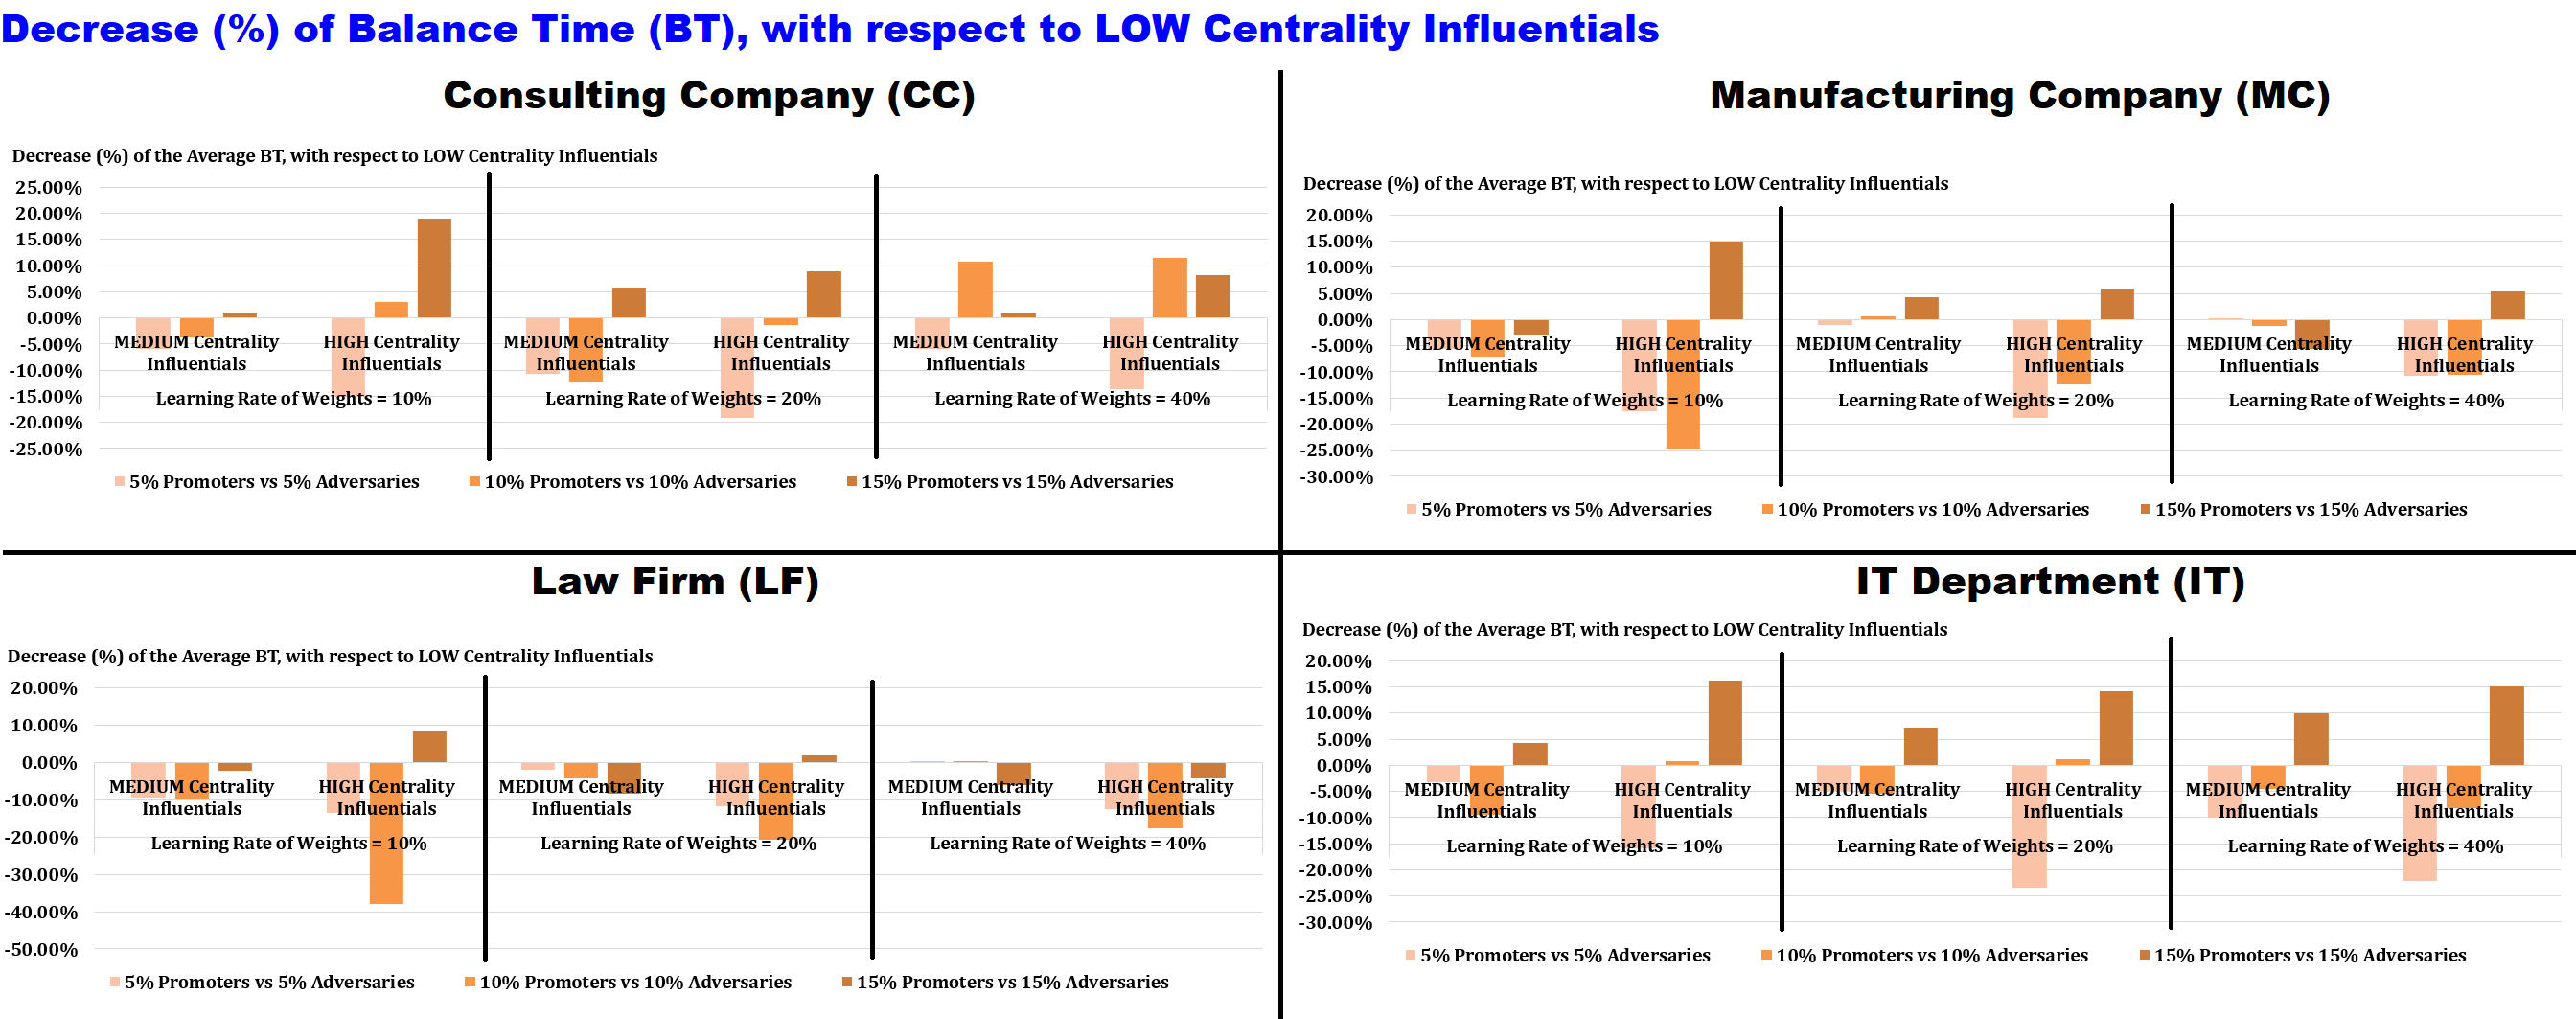

Supplement: s1 [file s1 › supplementary/SM IV (Figures of FPL, FNL, MB, MBT, BT)/BT/BT, with respect to LOW Centrality Influentials (Figure SM IV.14).png]

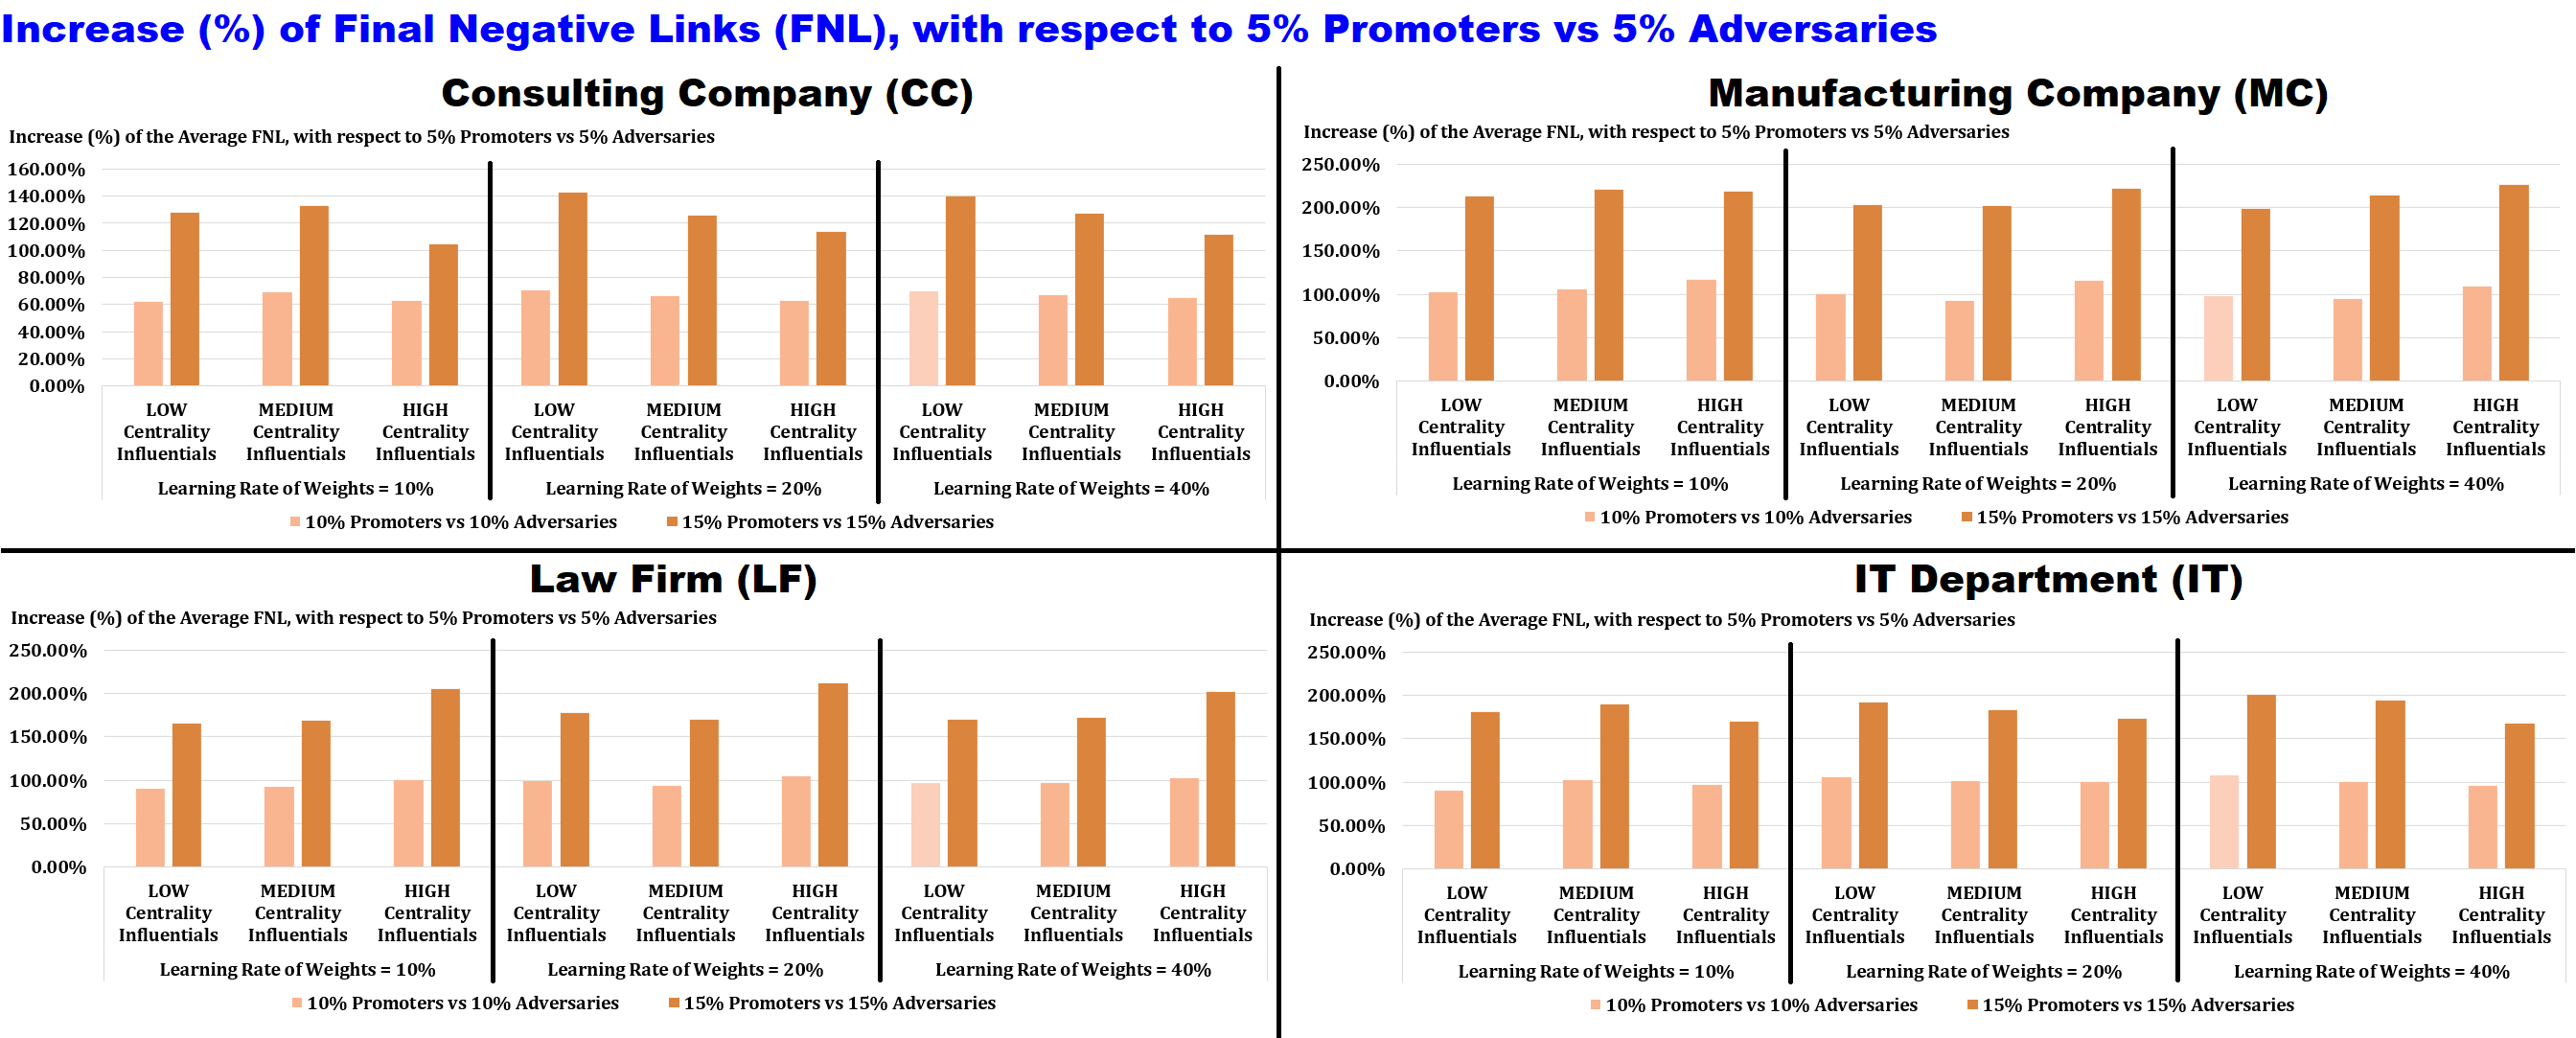

Supplement: s1 [file s1 › supplementary/SM IV (Figures of FPL, FNL, MB, MBT, BT)/FNL/FNL, with respect to 5% Promoters vs 5% Adversaries (Figure SM IV.4).png]

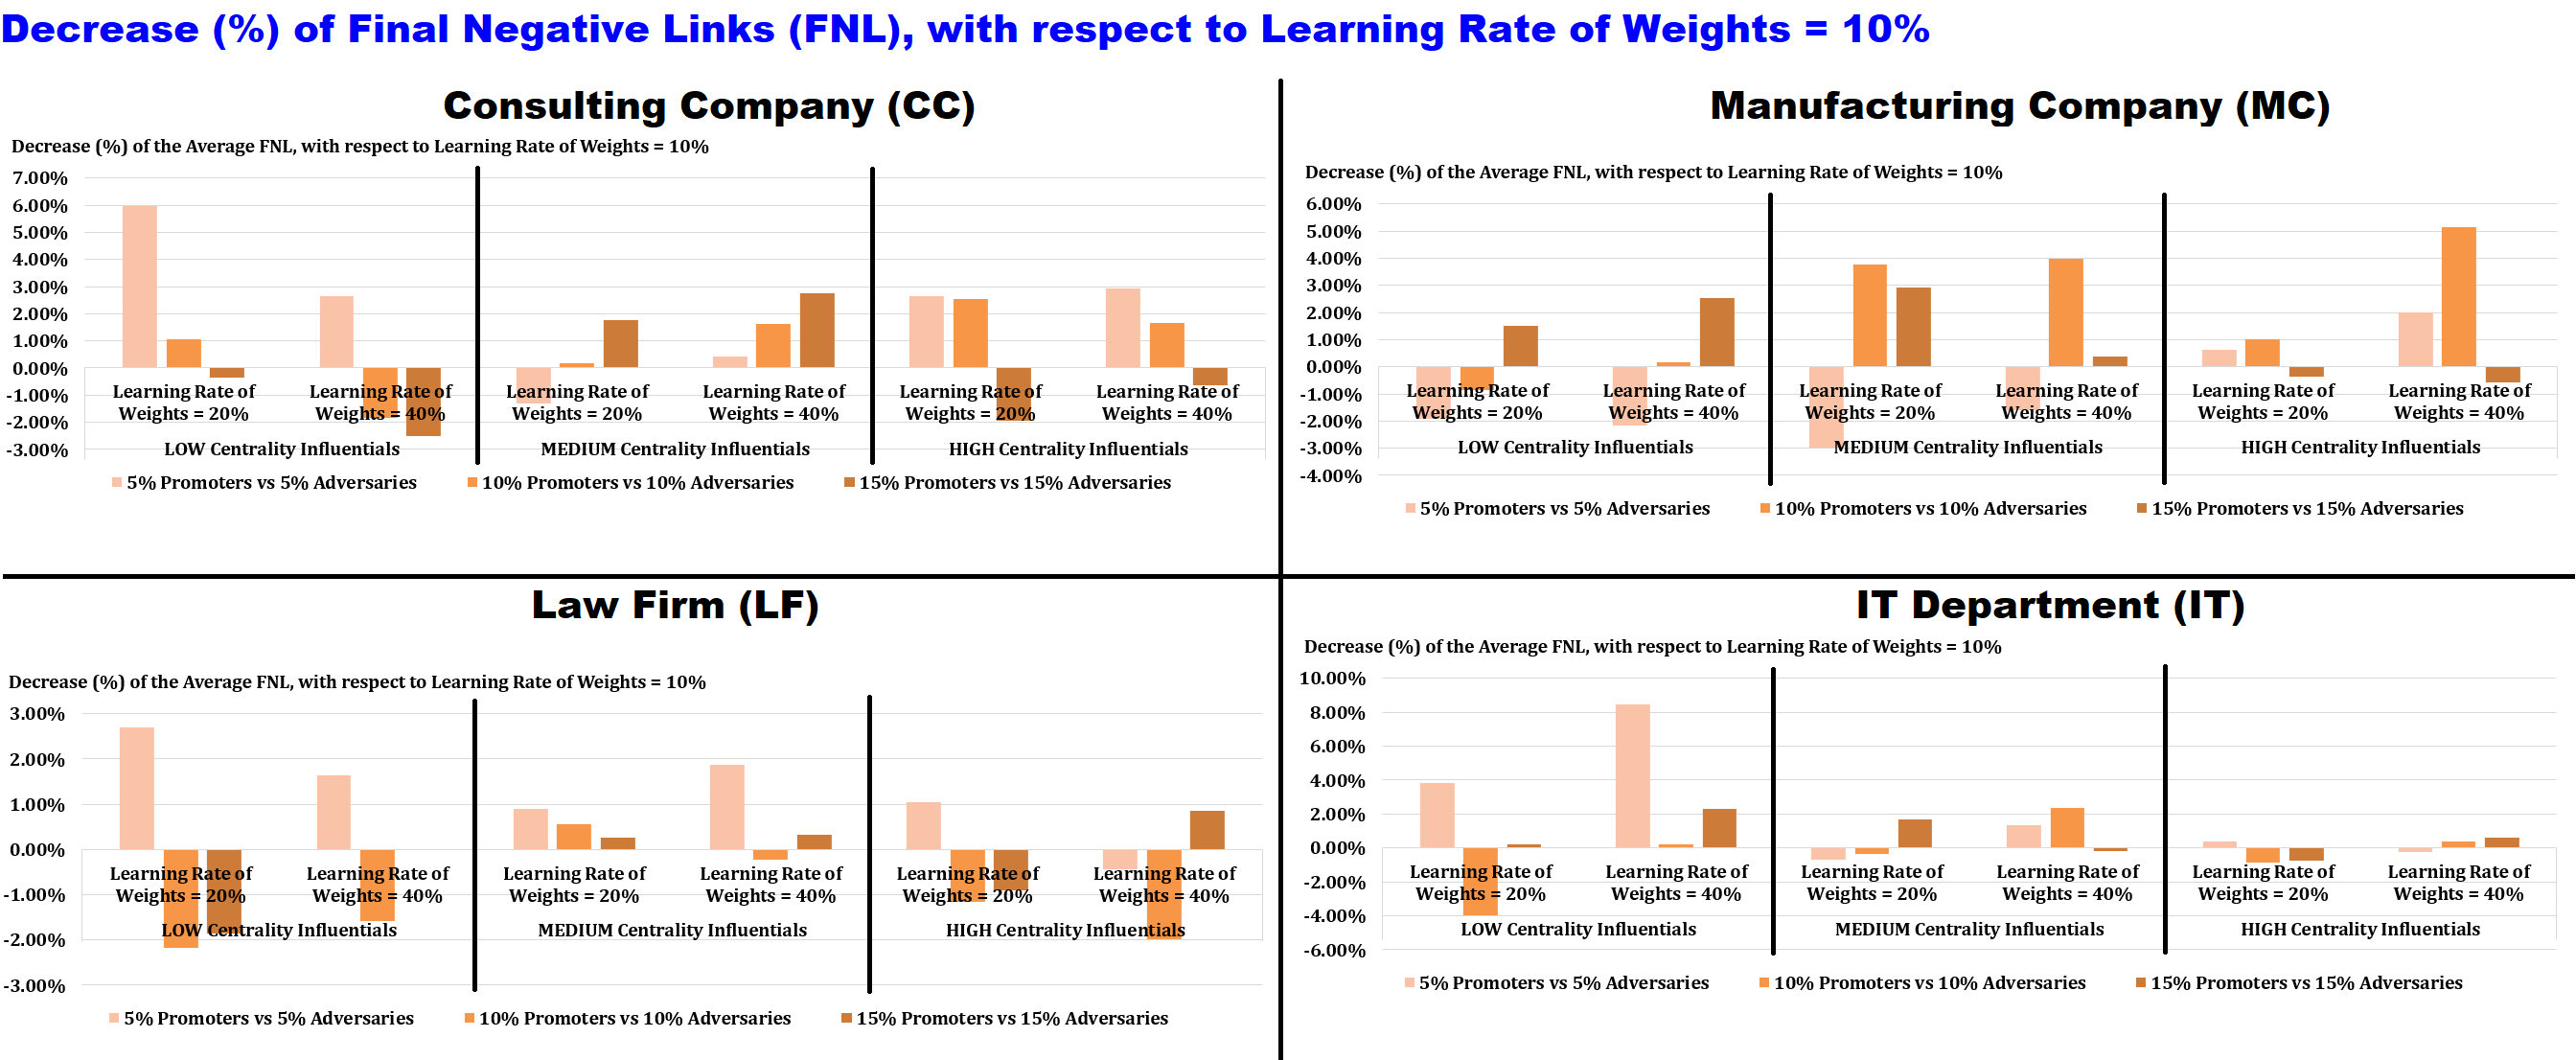

Supplement: s1 [file s1 › supplementary/SM IV (Figures of FPL, FNL, MB, MBT, BT)/FNL/FNL, with respect to Learning Rate of Weights = 10% (Figure SM IV.6).png]

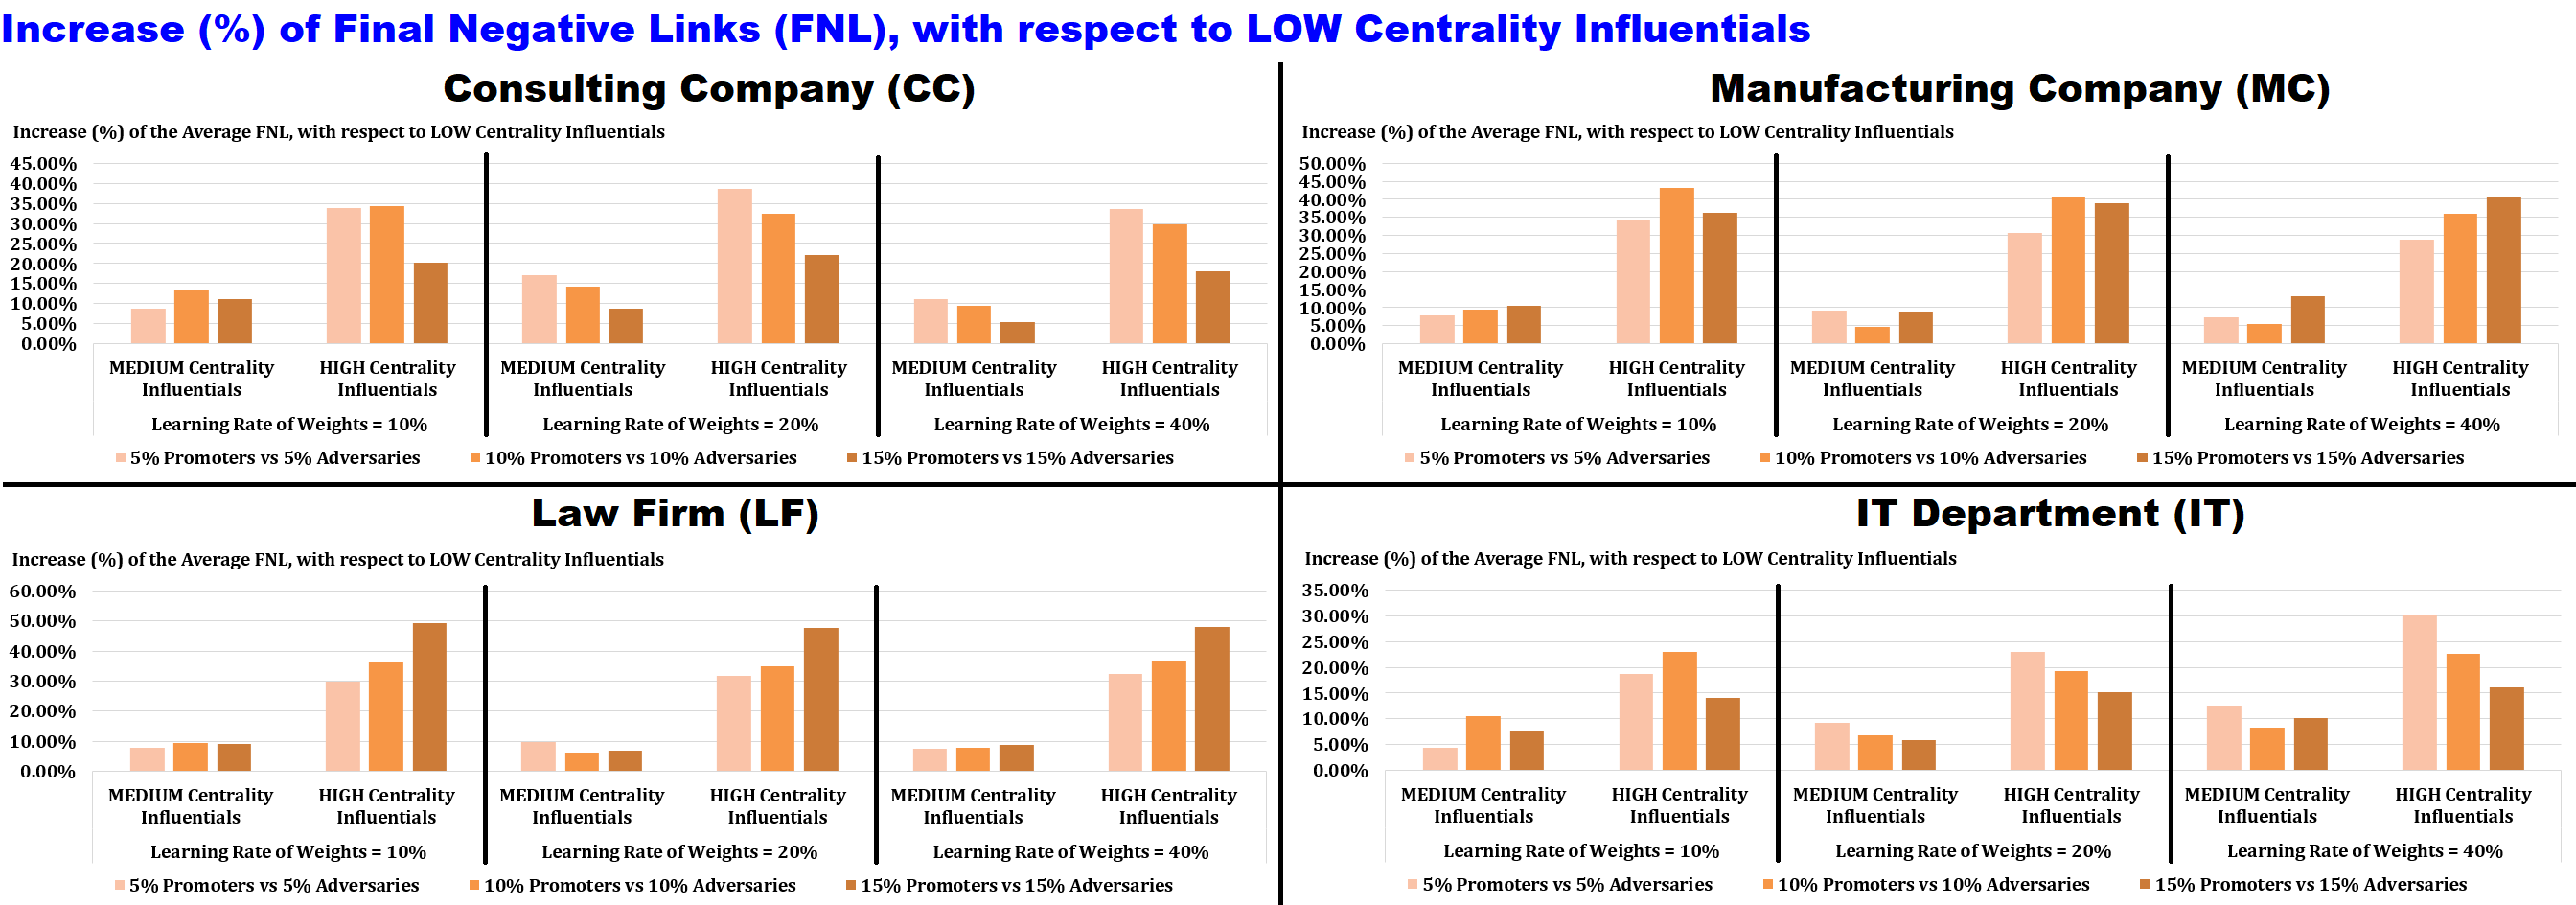

Supplement: s1 [file s1 › supplementary/SM IV (Figures of FPL, FNL, MB, MBT, BT)/FNL/FNL, with respect to LOW Centrality Influentials (Figure SM IV.5).png]

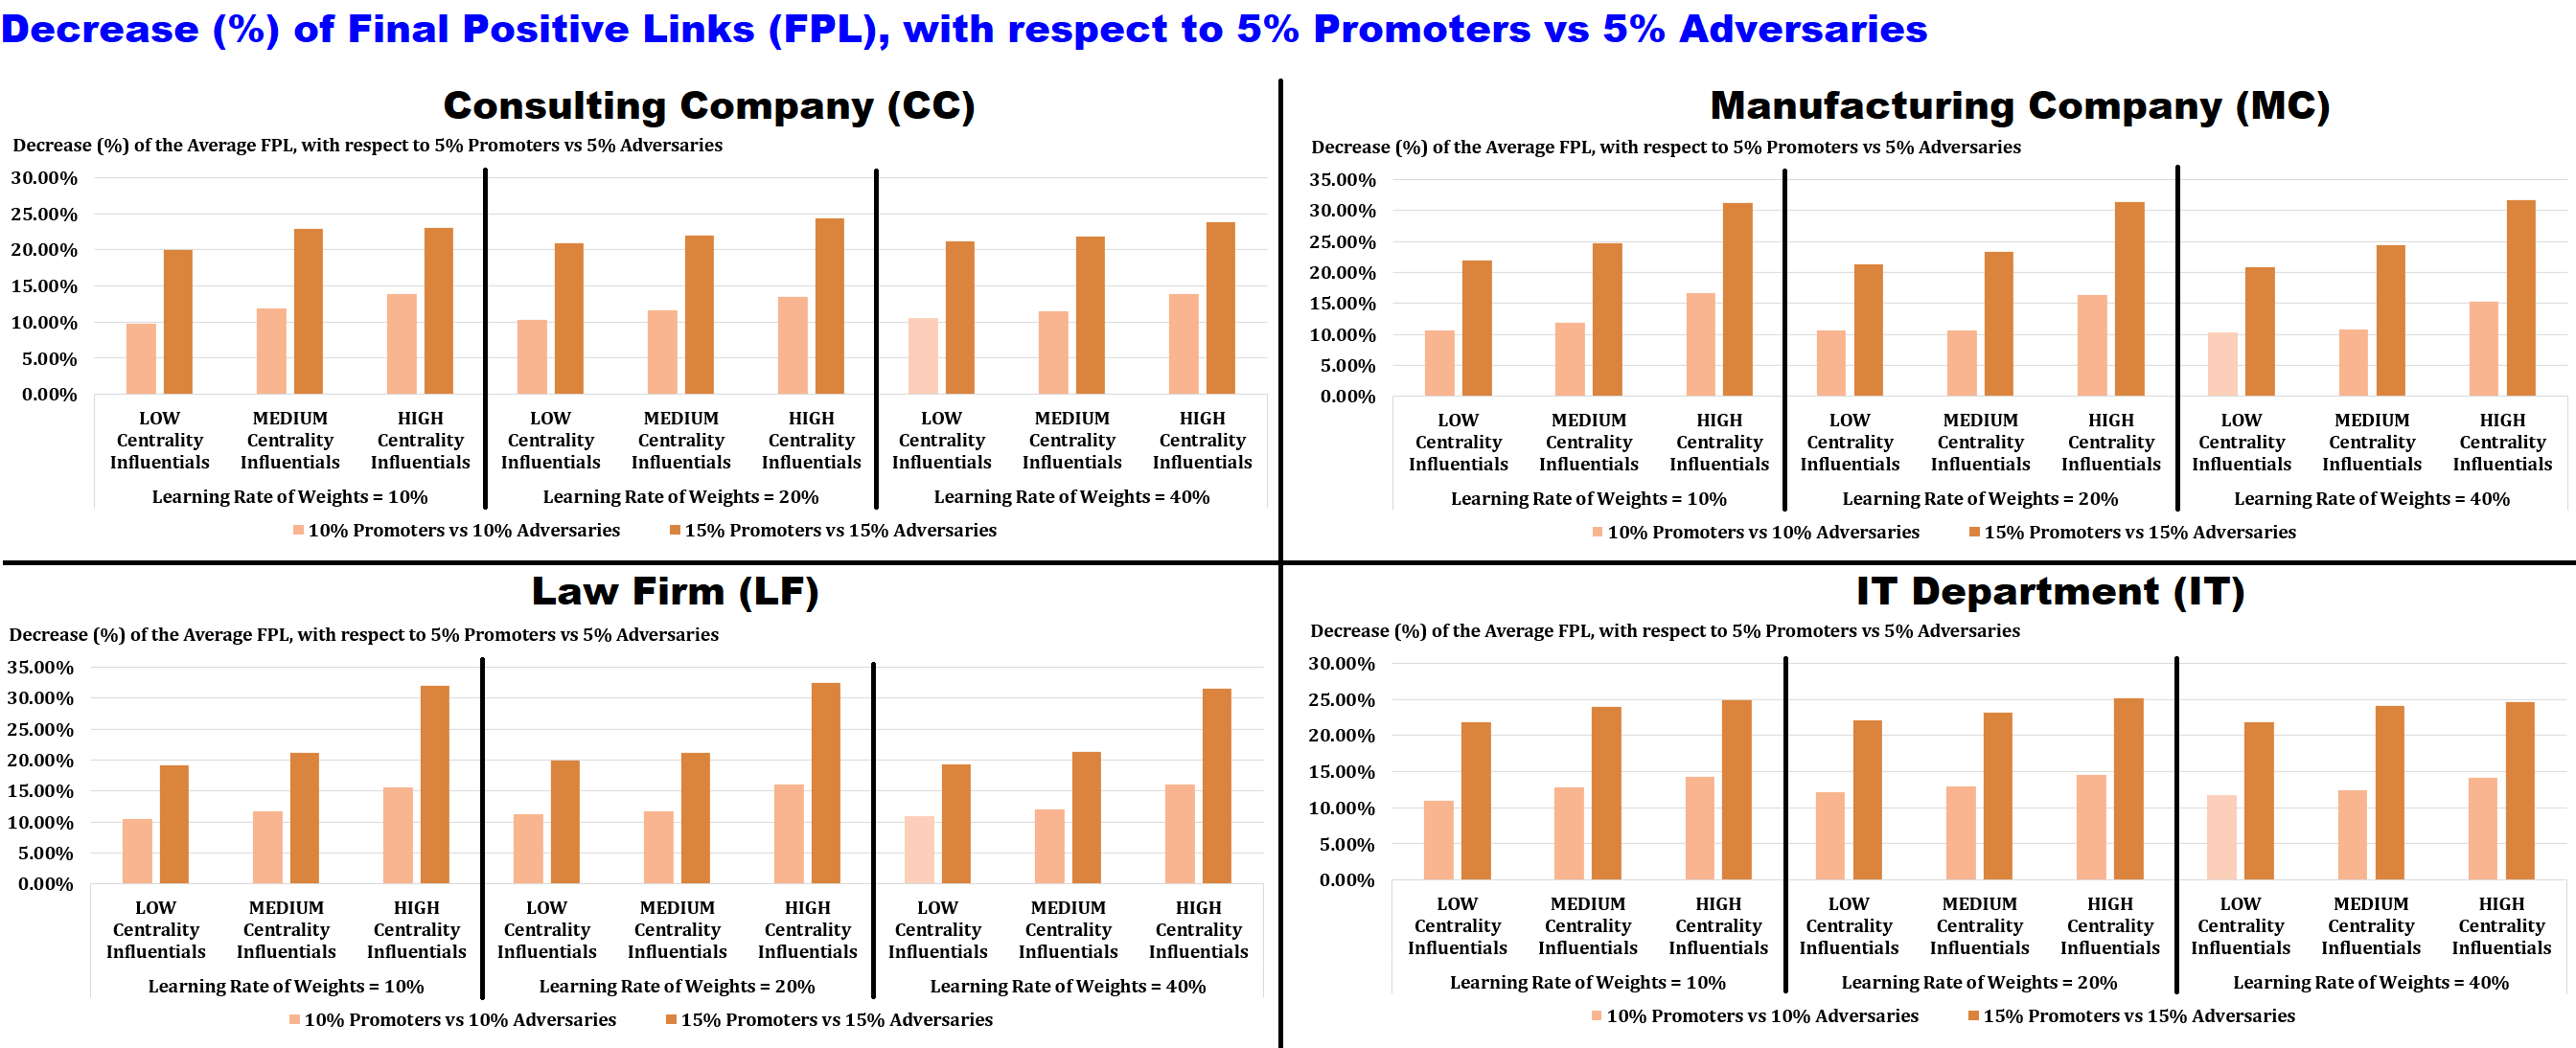

Supplement: s1 [file s1 › supplementary/SM IV (Figures of FPL, FNL, MB, MBT, BT)/FPL/FPL, with respect to 5% Promoters vs 5% Adversaries (Figure SM IV.1).png]

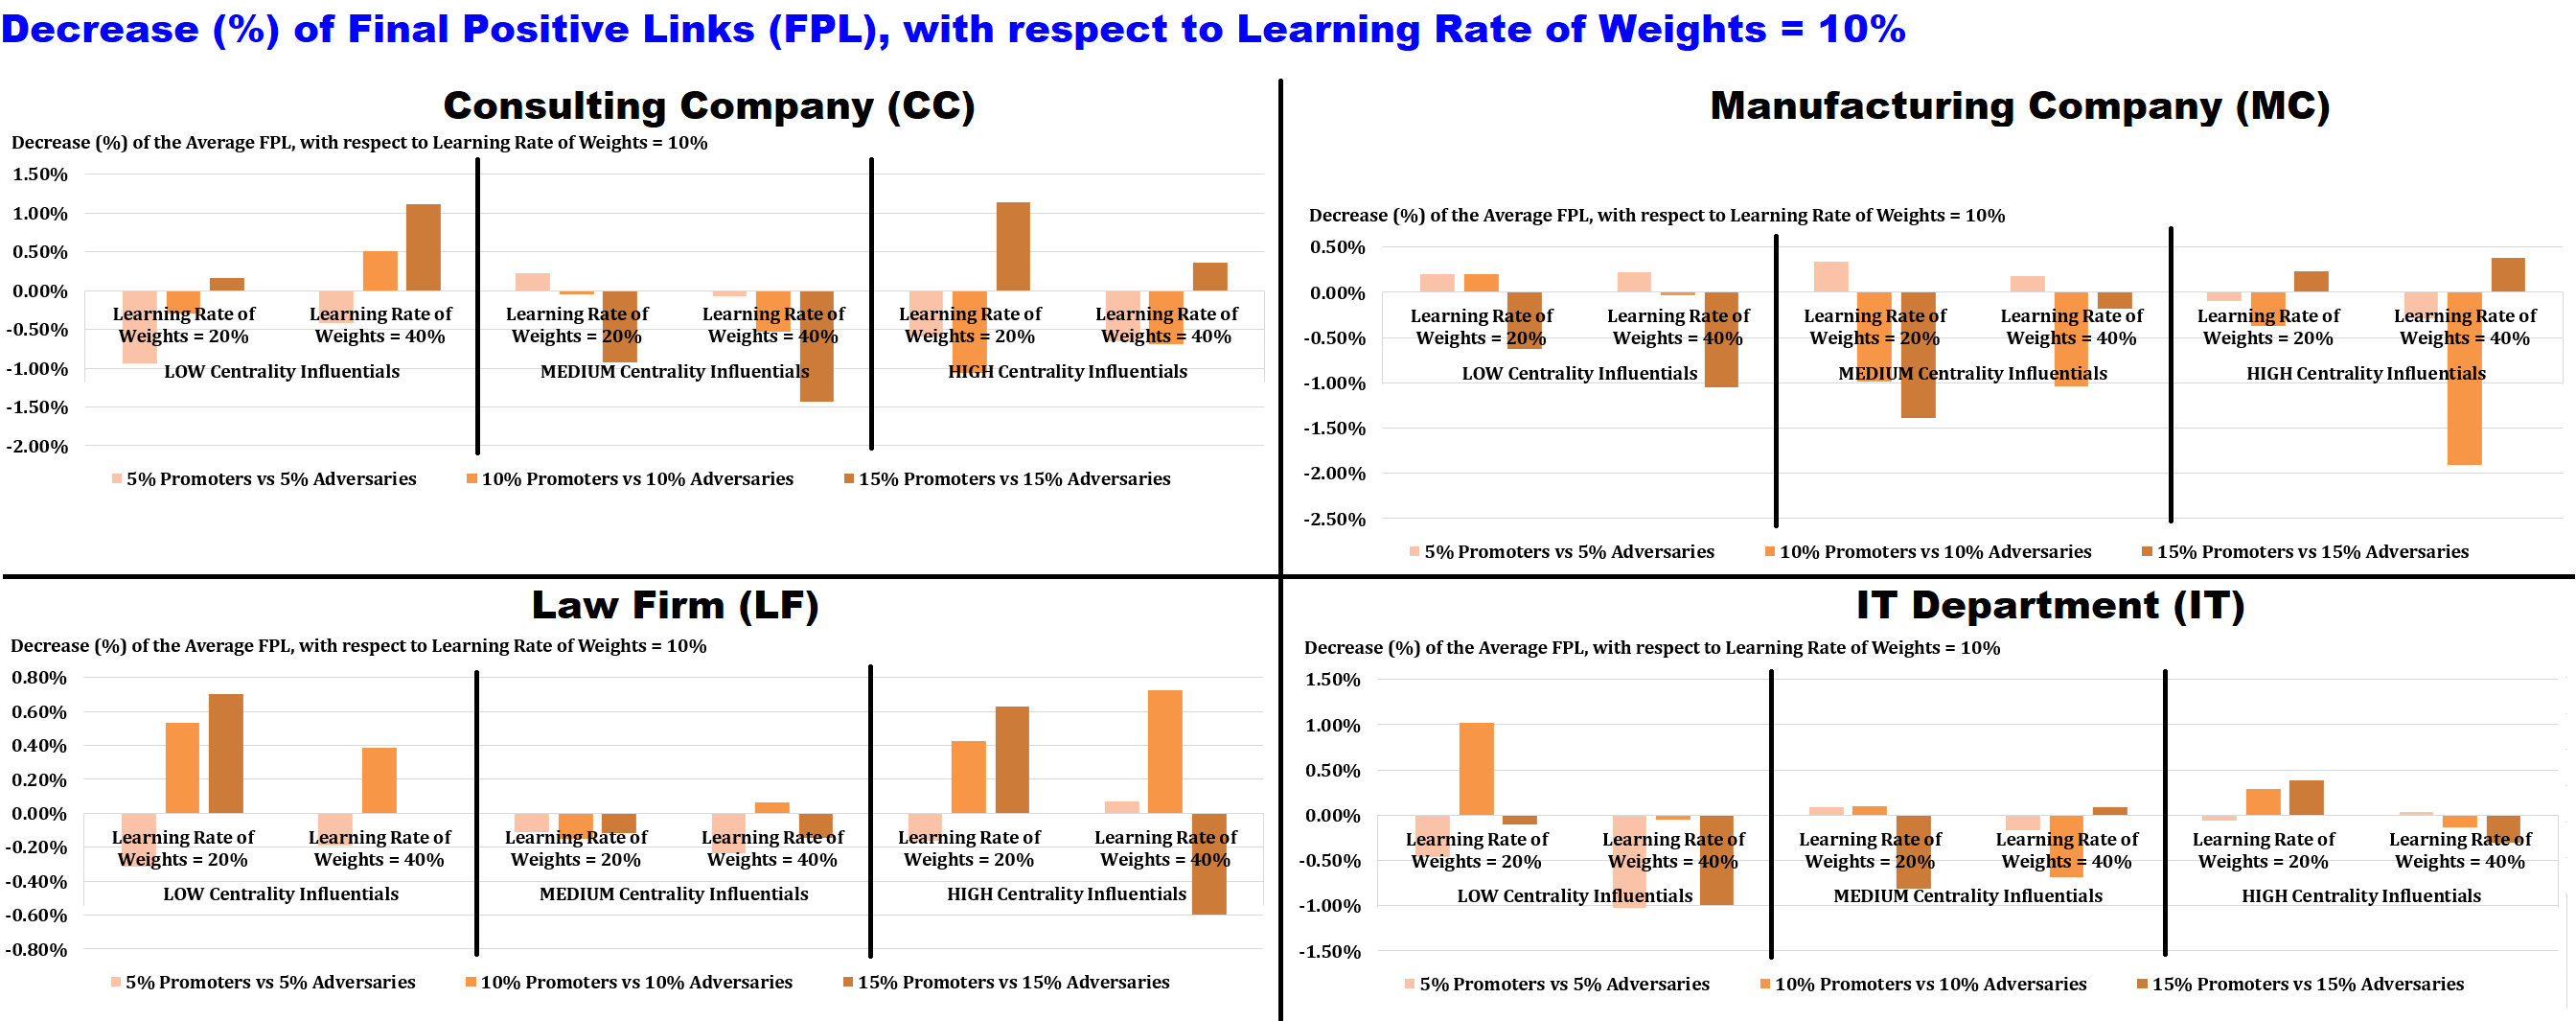

Supplement: s1 [file s1 › supplementary/SM IV (Figures of FPL, FNL, MB, MBT, BT)/FPL/FPL, with respect to Learning Rate of Weights = 10% (Figure SM IV.3).png]

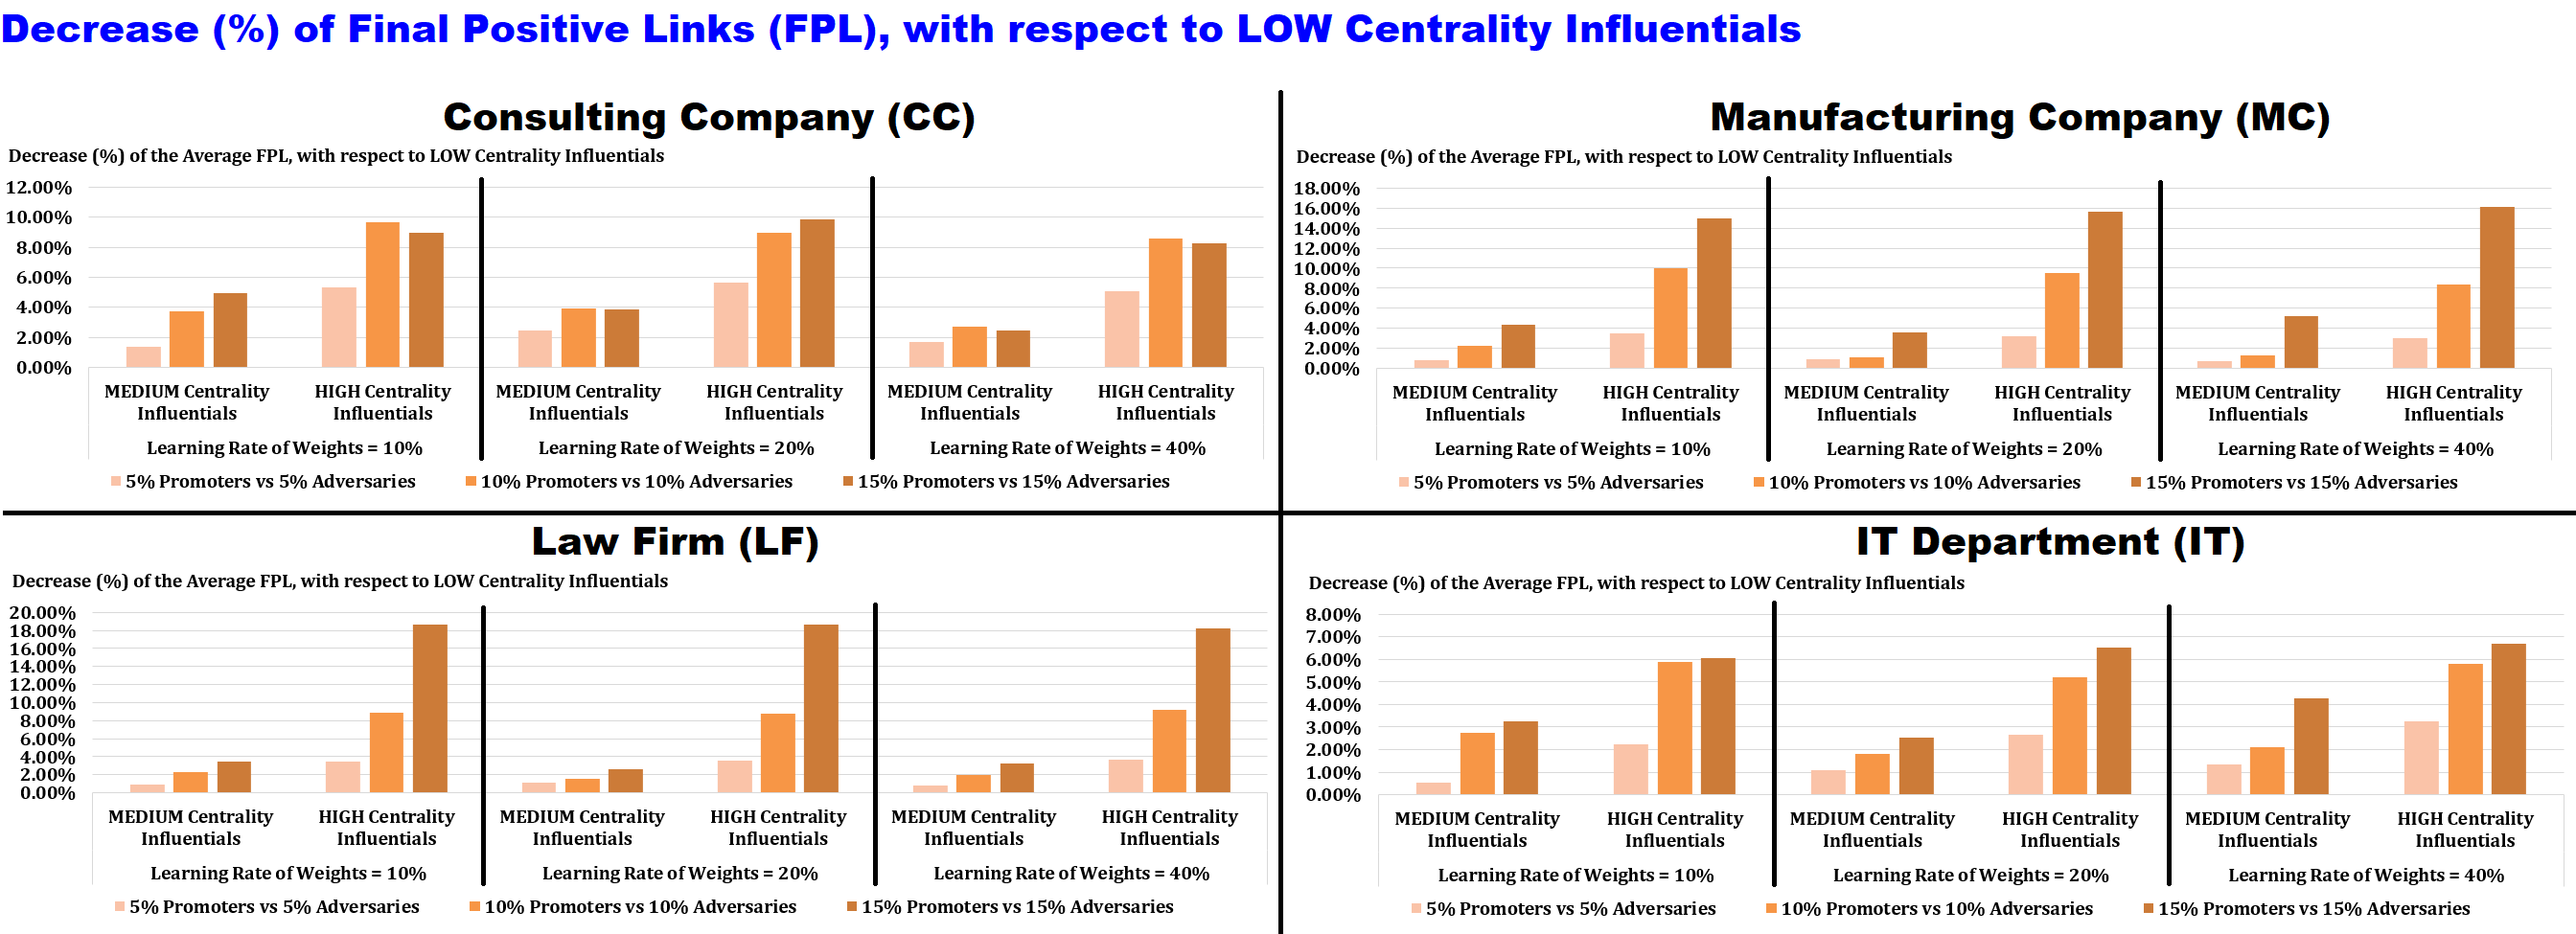

Supplement: s1 [file s1 › supplementary/SM IV (Figures of FPL, FNL, MB, MBT, BT)/FPL/FPL, with respect to LOW Centrality Influentials (Figure SM IV.2).png]

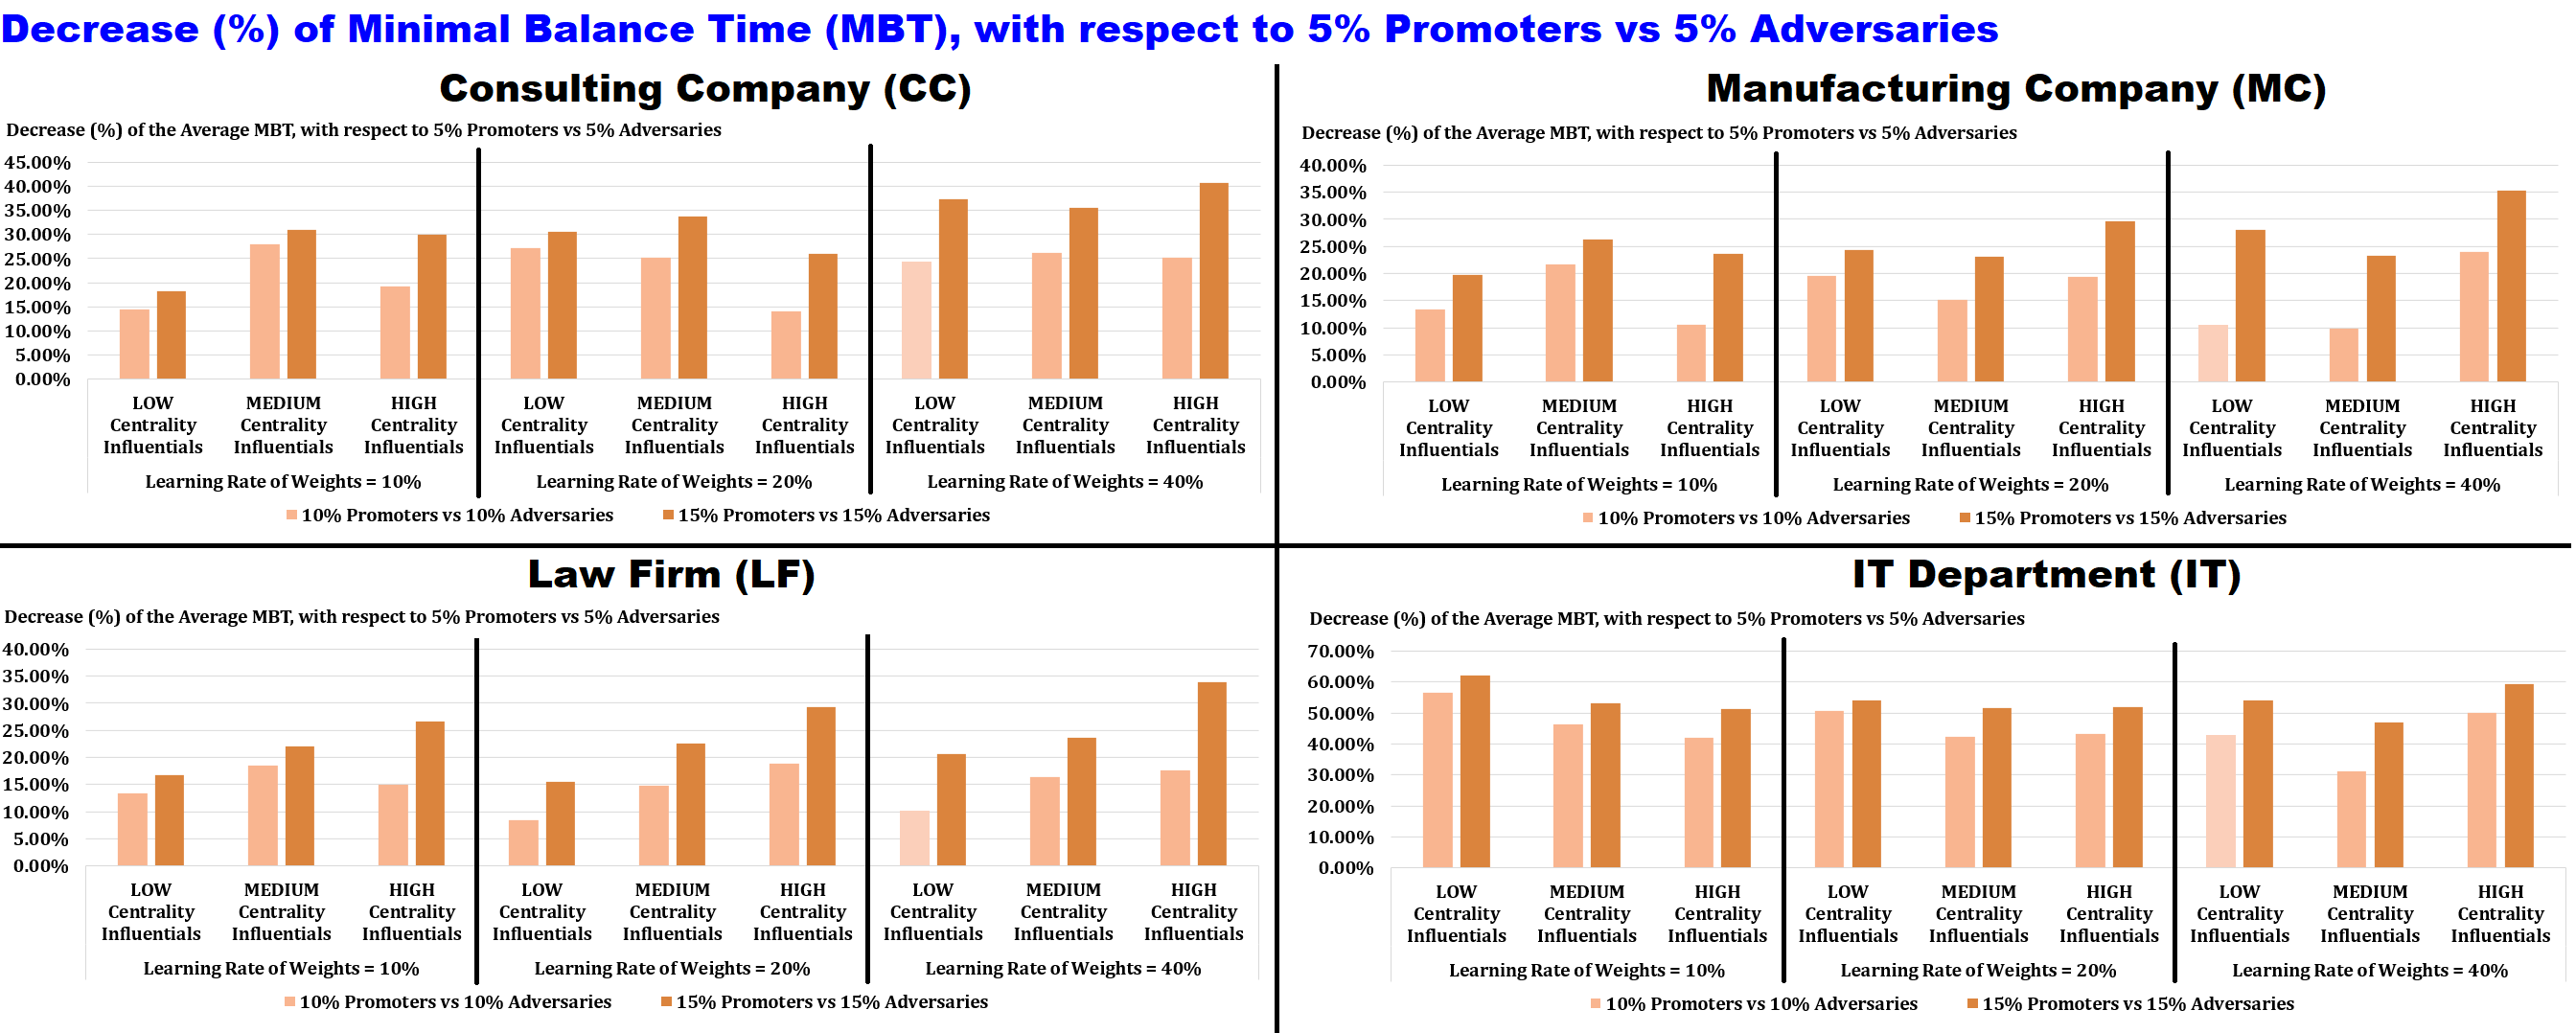

Supplement: s1 [file s1 › supplementary/SM IV (Figures of FPL, FNL, MB, MBT, BT)/MBT/MBT, with respect to 5% Promoters vs 5% Adversaries (Figure SM IV.10).png]

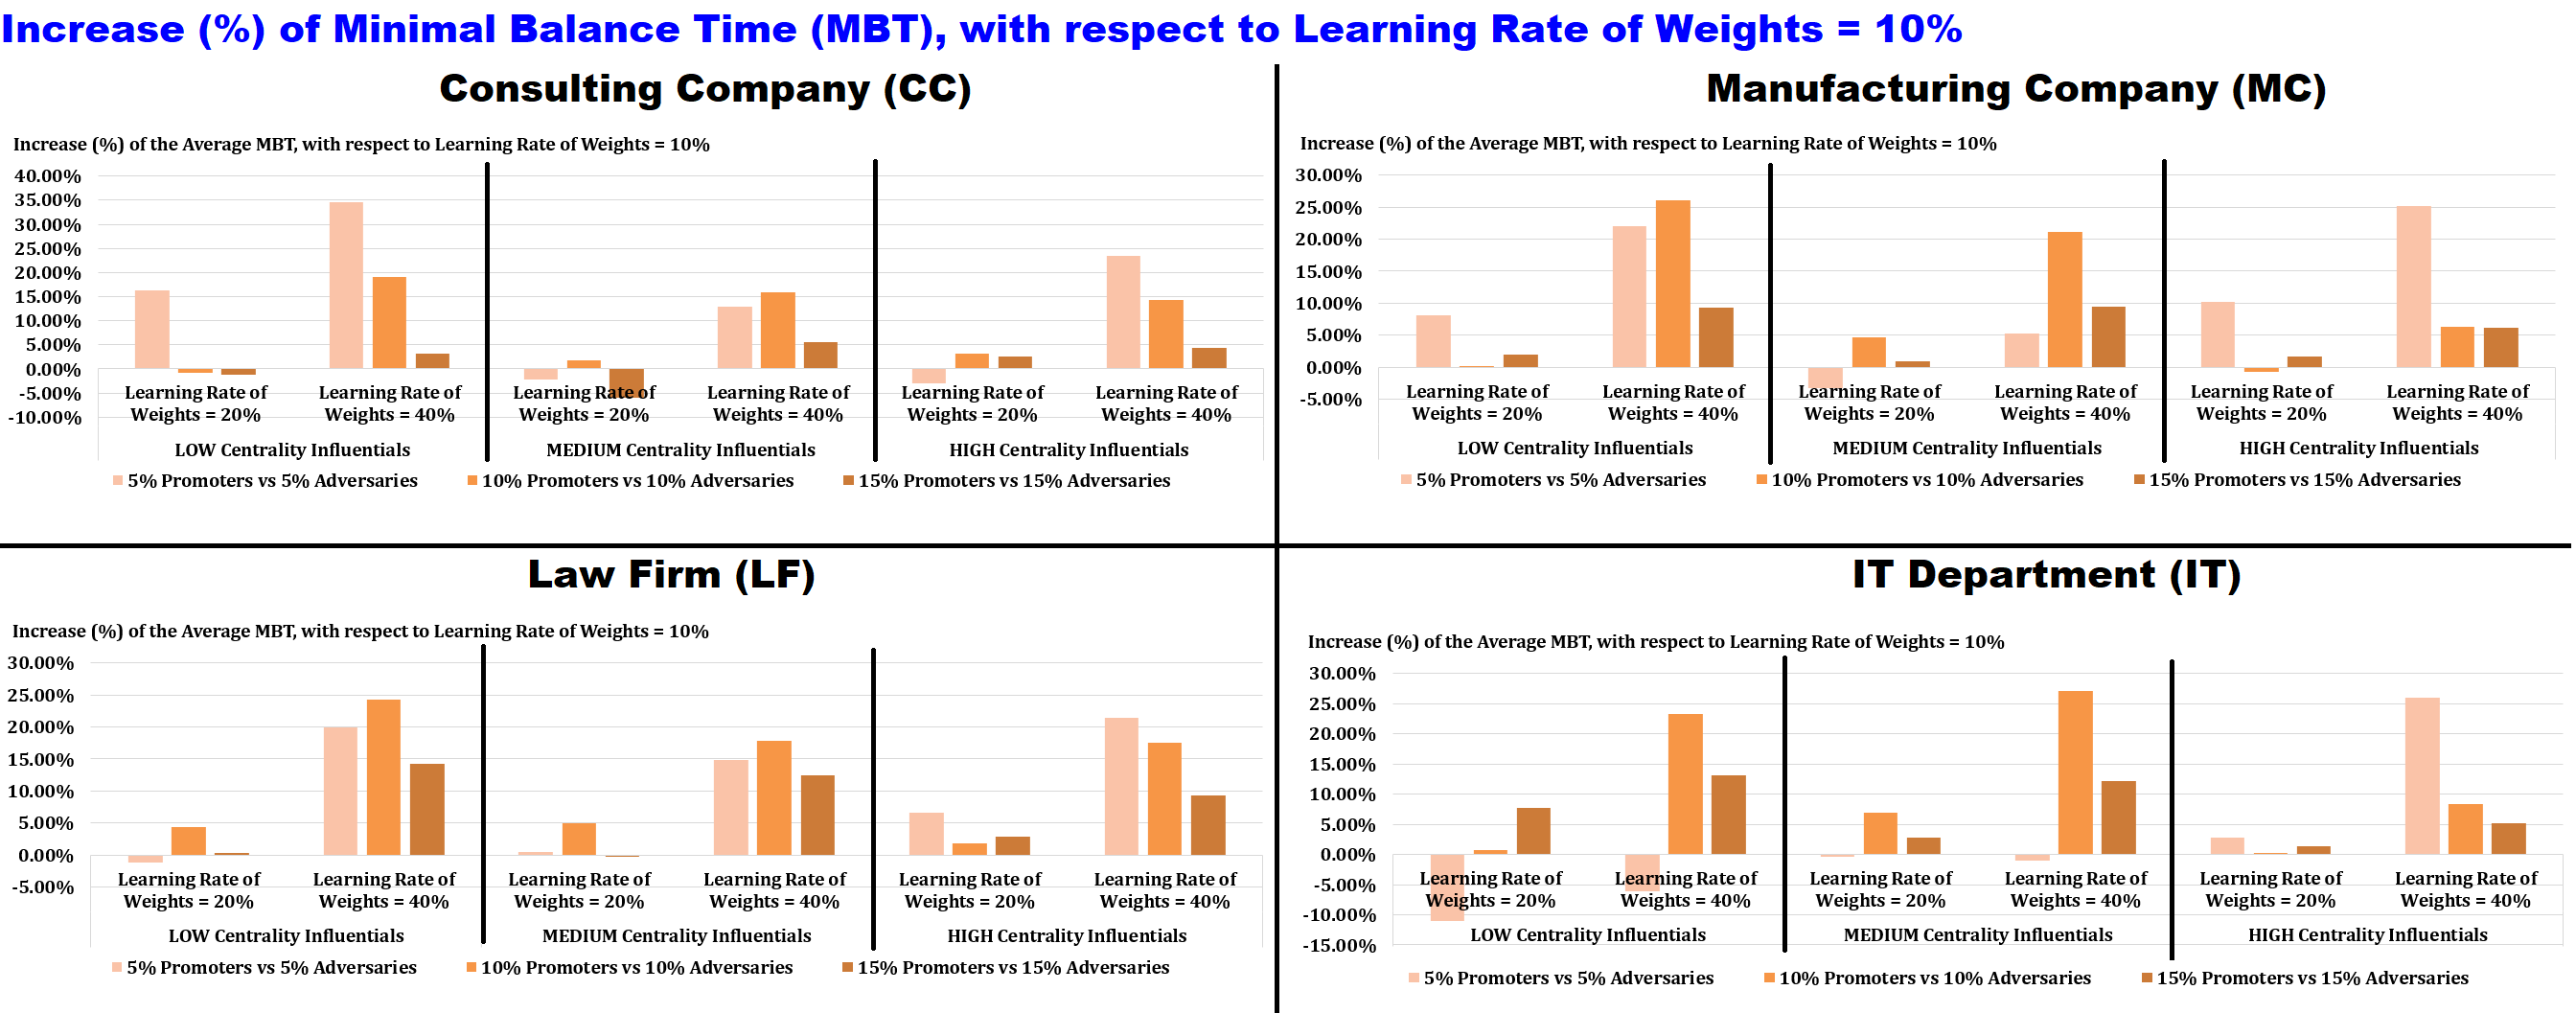

Supplement: s1 [file s1 › supplementary/SM IV (Figures of FPL, FNL, MB, MBT, BT)/MBT/MBT, with respect to Learning Rate of Weights = 10% (Figure SM IV.12).png]

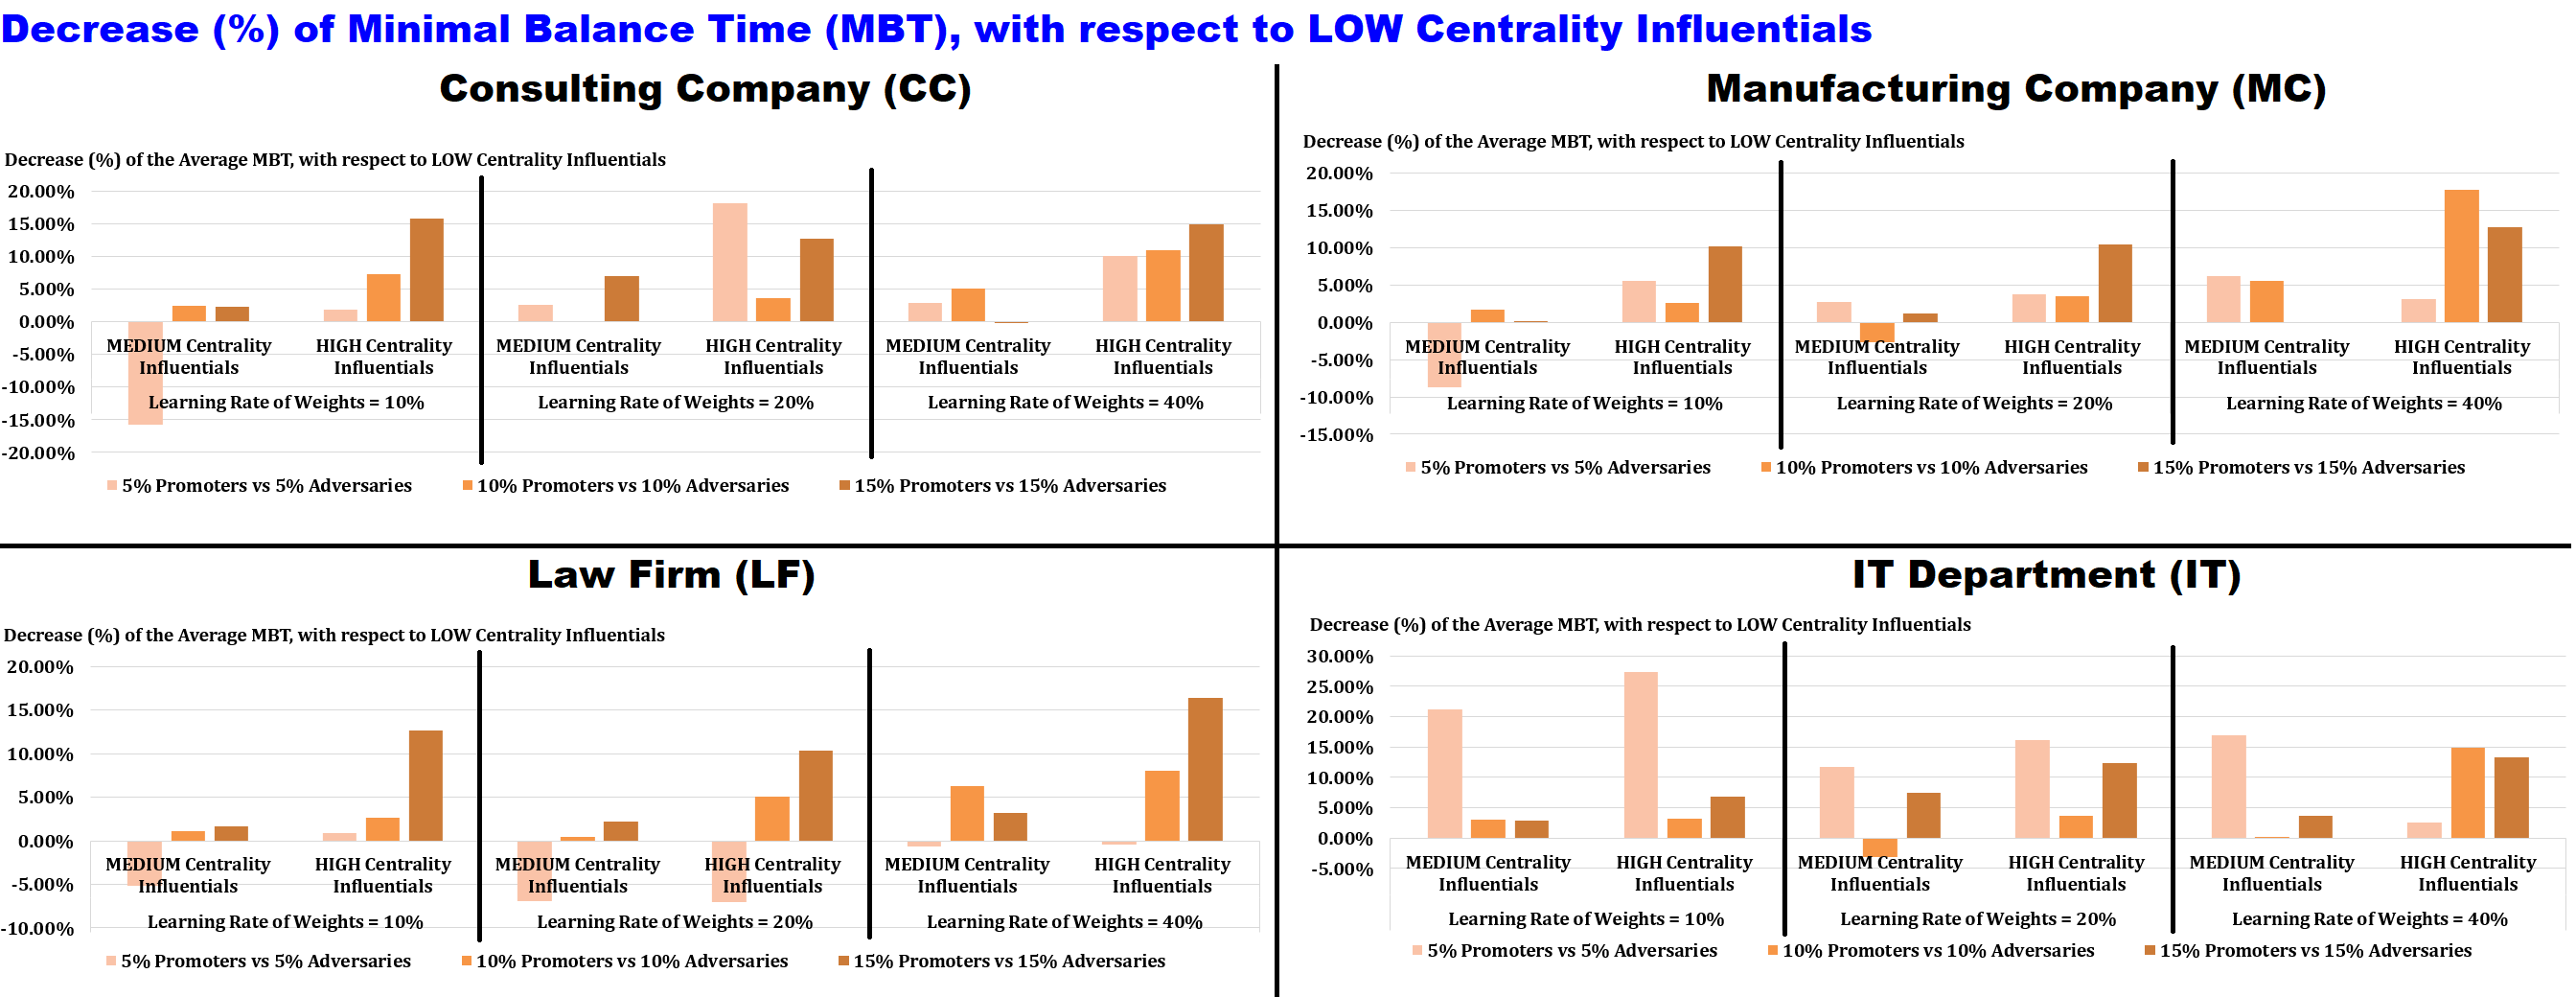

Supplement: s1 [file s1 › supplementary/SM IV (Figures of FPL, FNL, MB, MBT, BT)/MBT/MBT, with respect to LOW Centrality Influentials (Figure SM IV.11).png]

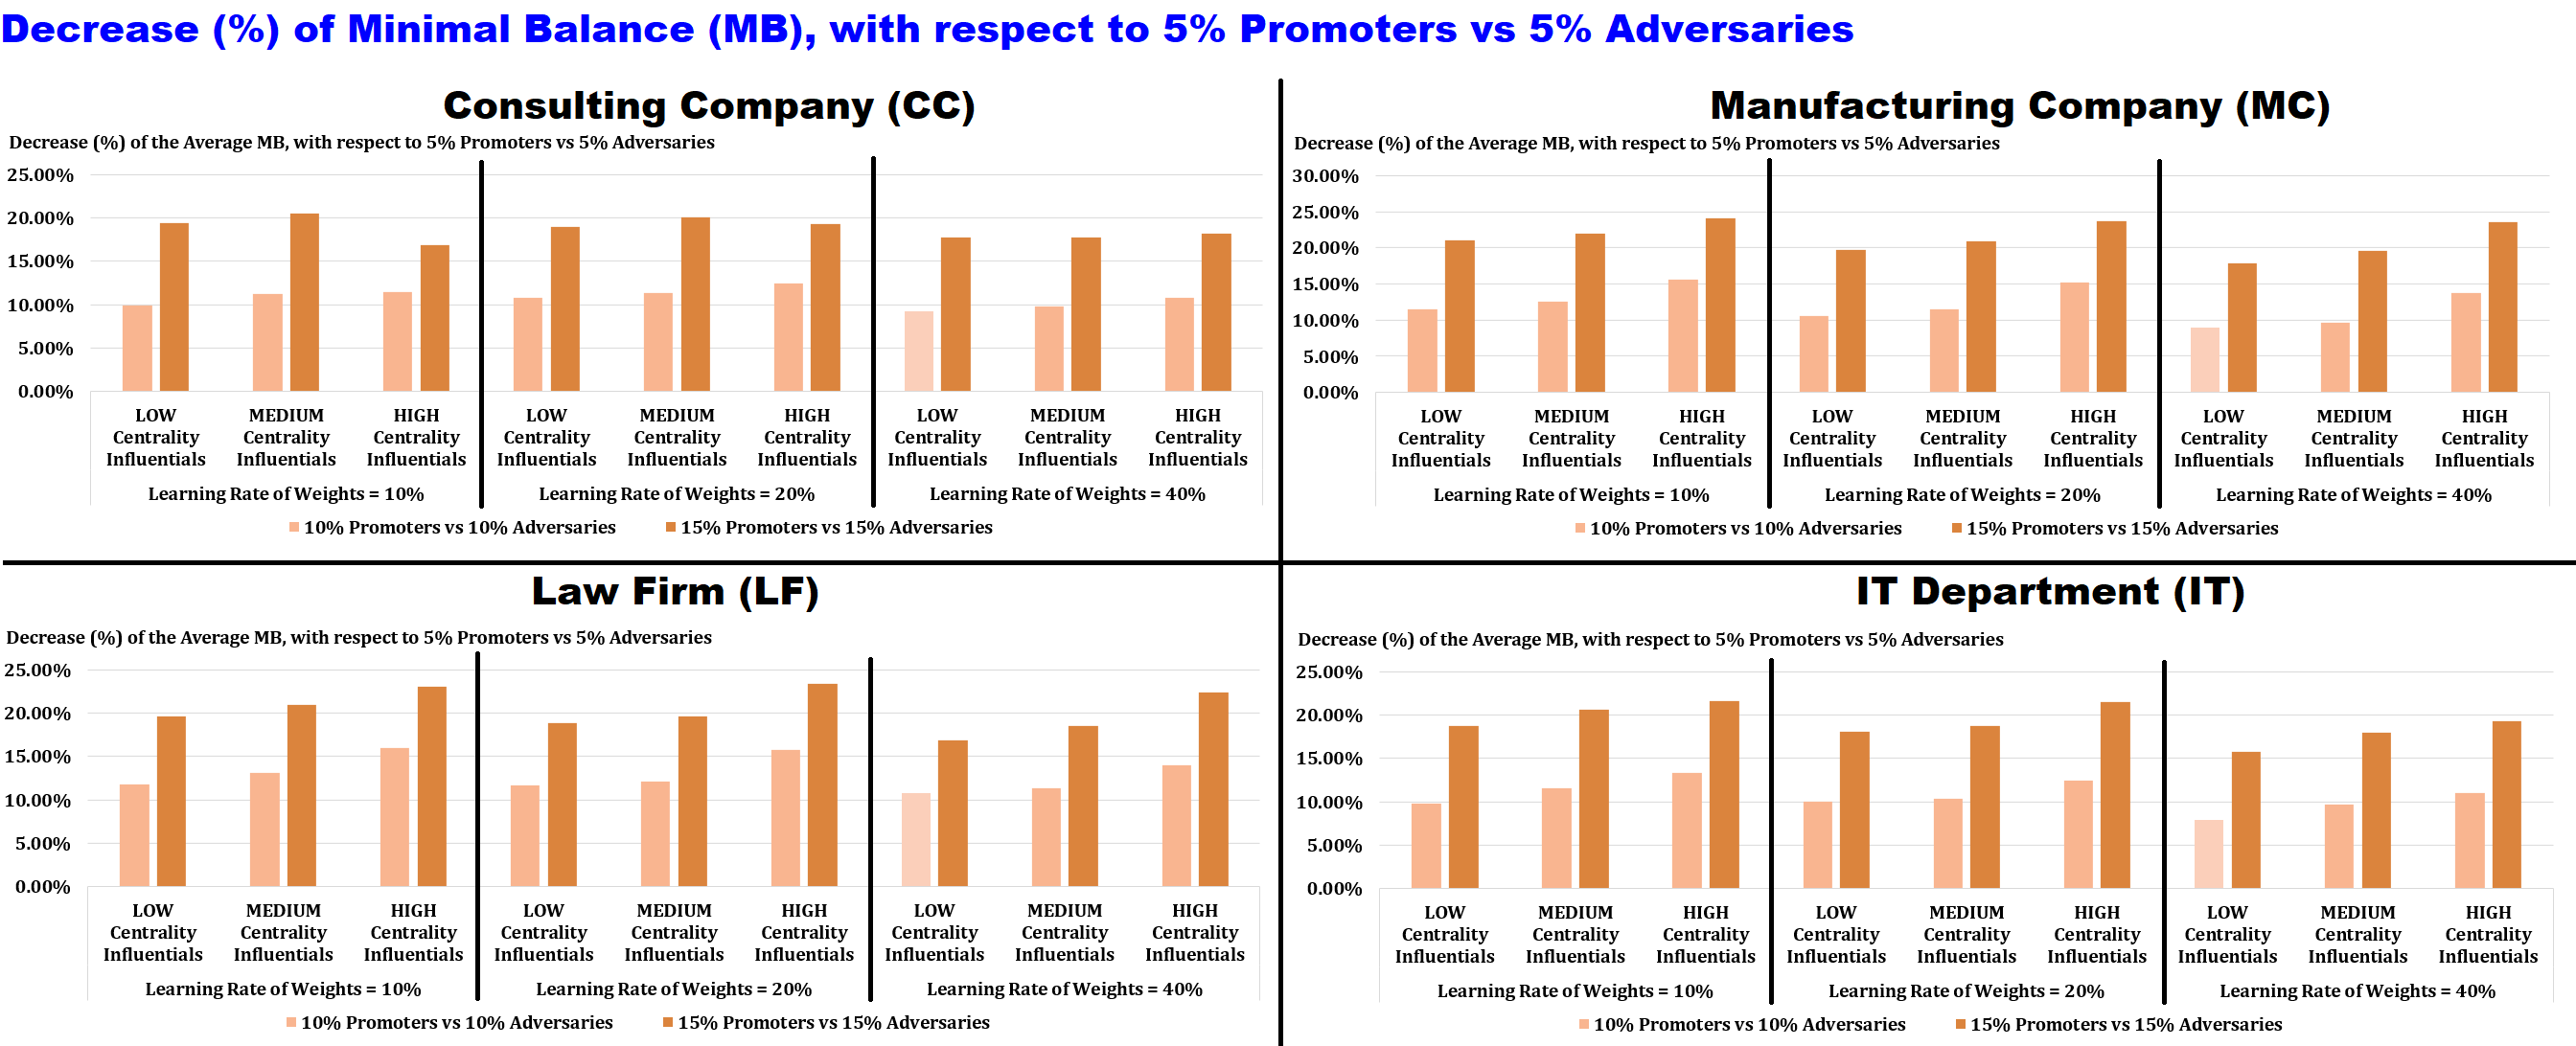

Supplement: s1 [file s1 › supplementary/SM IV (Figures of FPL, FNL, MB, MBT, BT)/MB/MB, with respect to 5% Promoters vs 5% Adversaries (Figure SM IV.7).png]

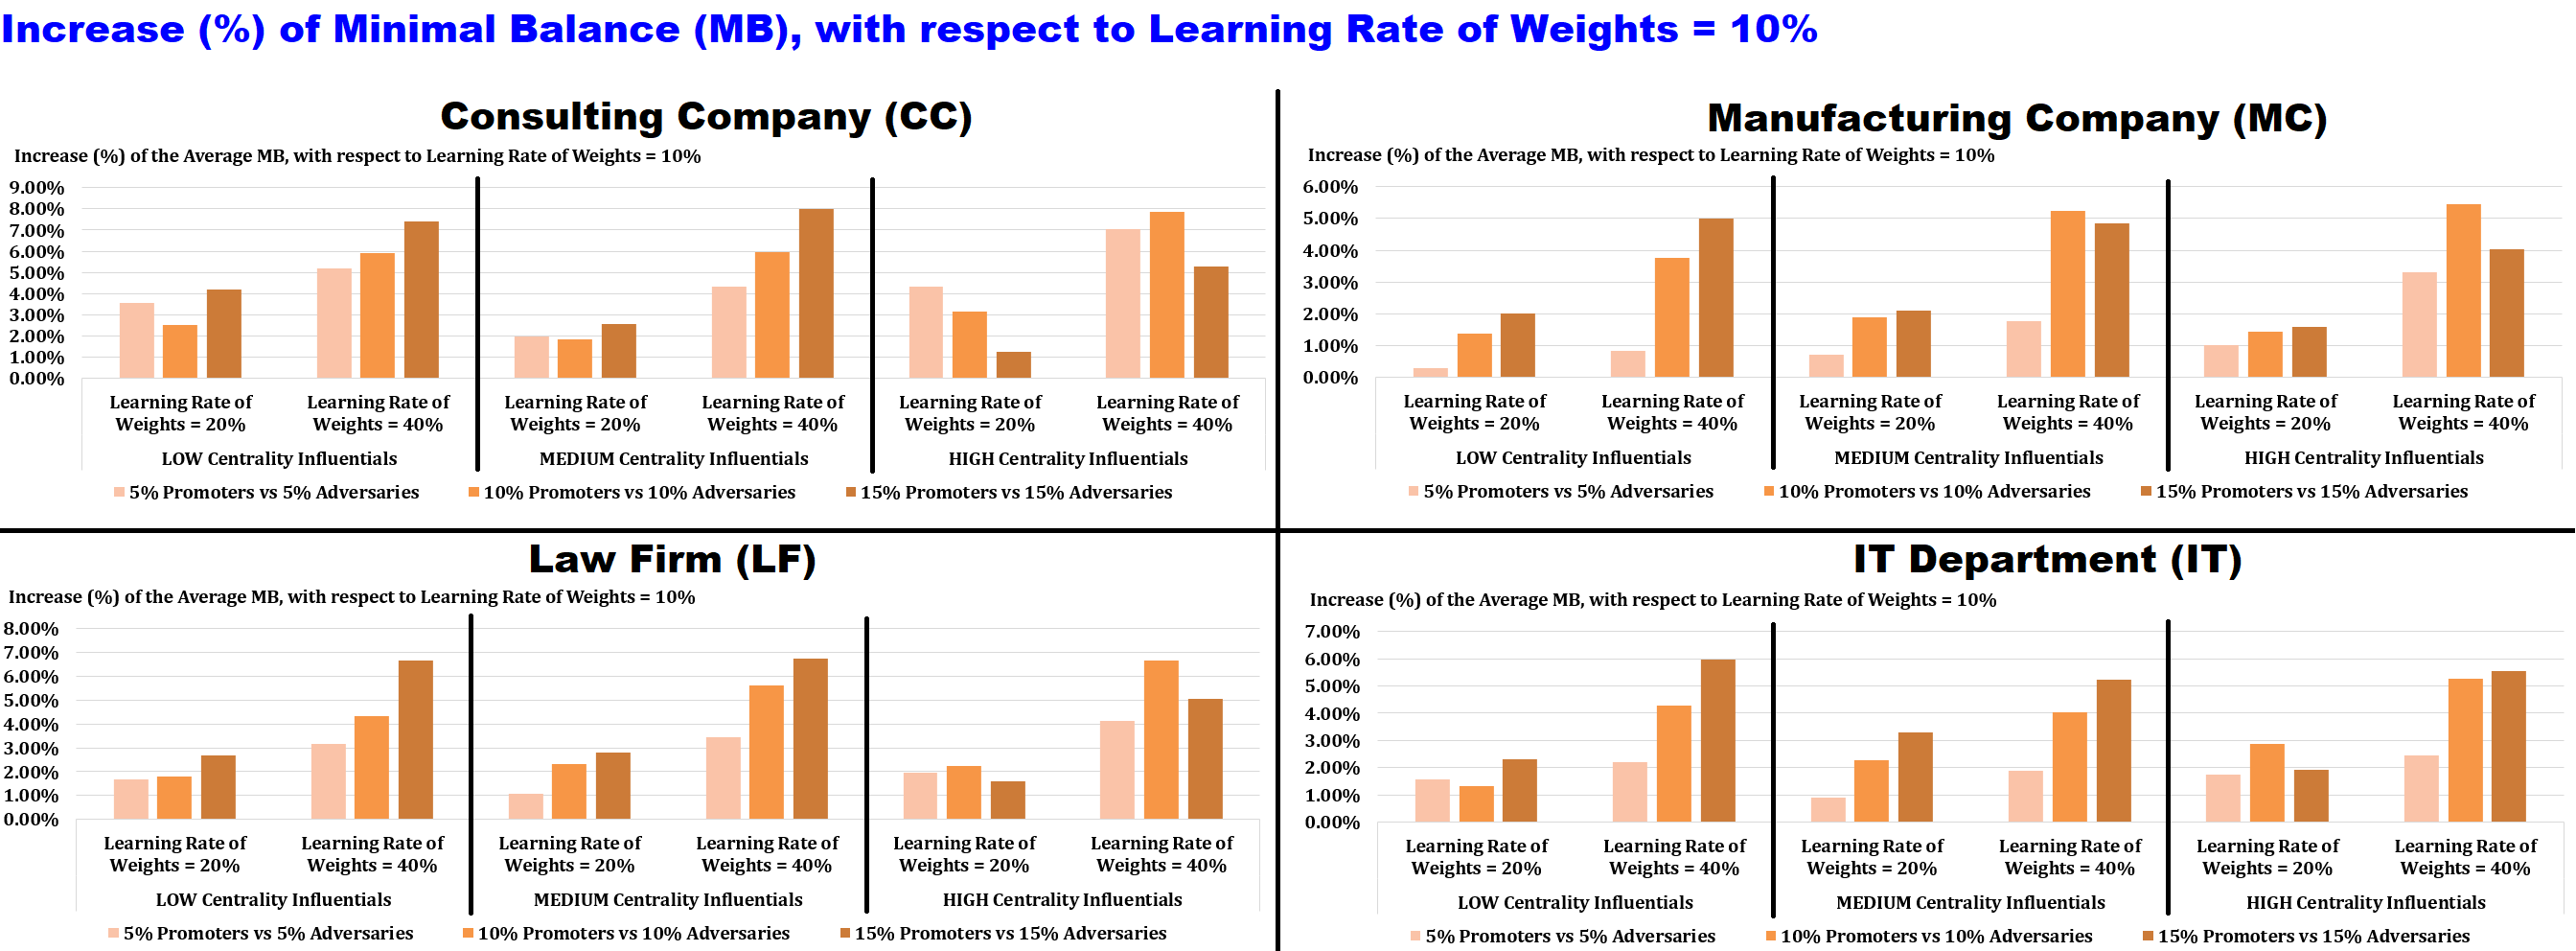

Supplement: s1 [file s1 › supplementary/SM IV (Figures of FPL, FNL, MB, MBT, BT)/MB/MB, with respect to Learning Rate of Weights = 10% (Figure SM IV.9).png]

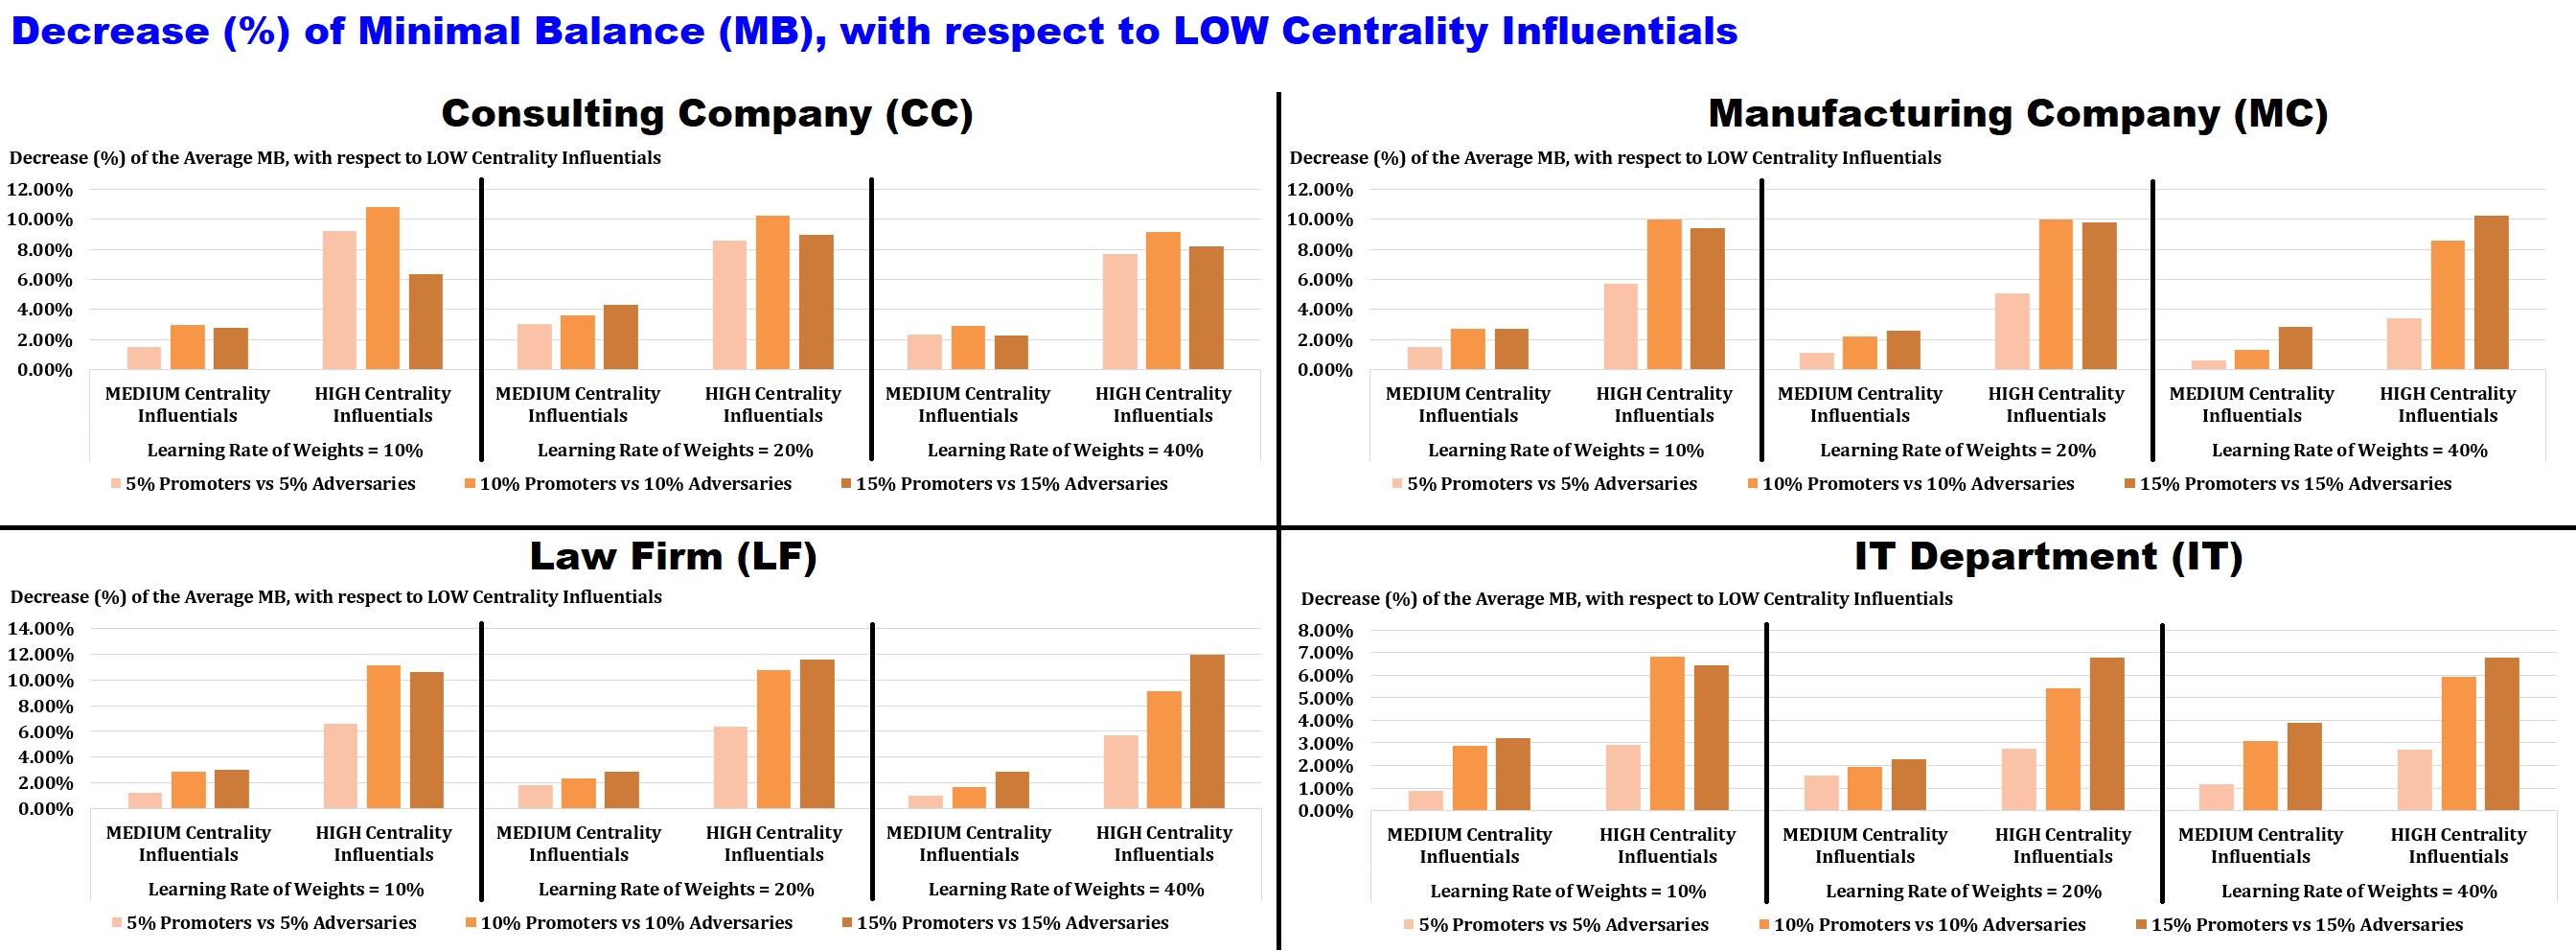

Supplement: s1 [file s1 › supplementary/SM IV (Figures of FPL, FNL, MB, MBT, BT)/MB/MB, with respect to LOW Centrality Influentials (Figure SM IV.8).png]

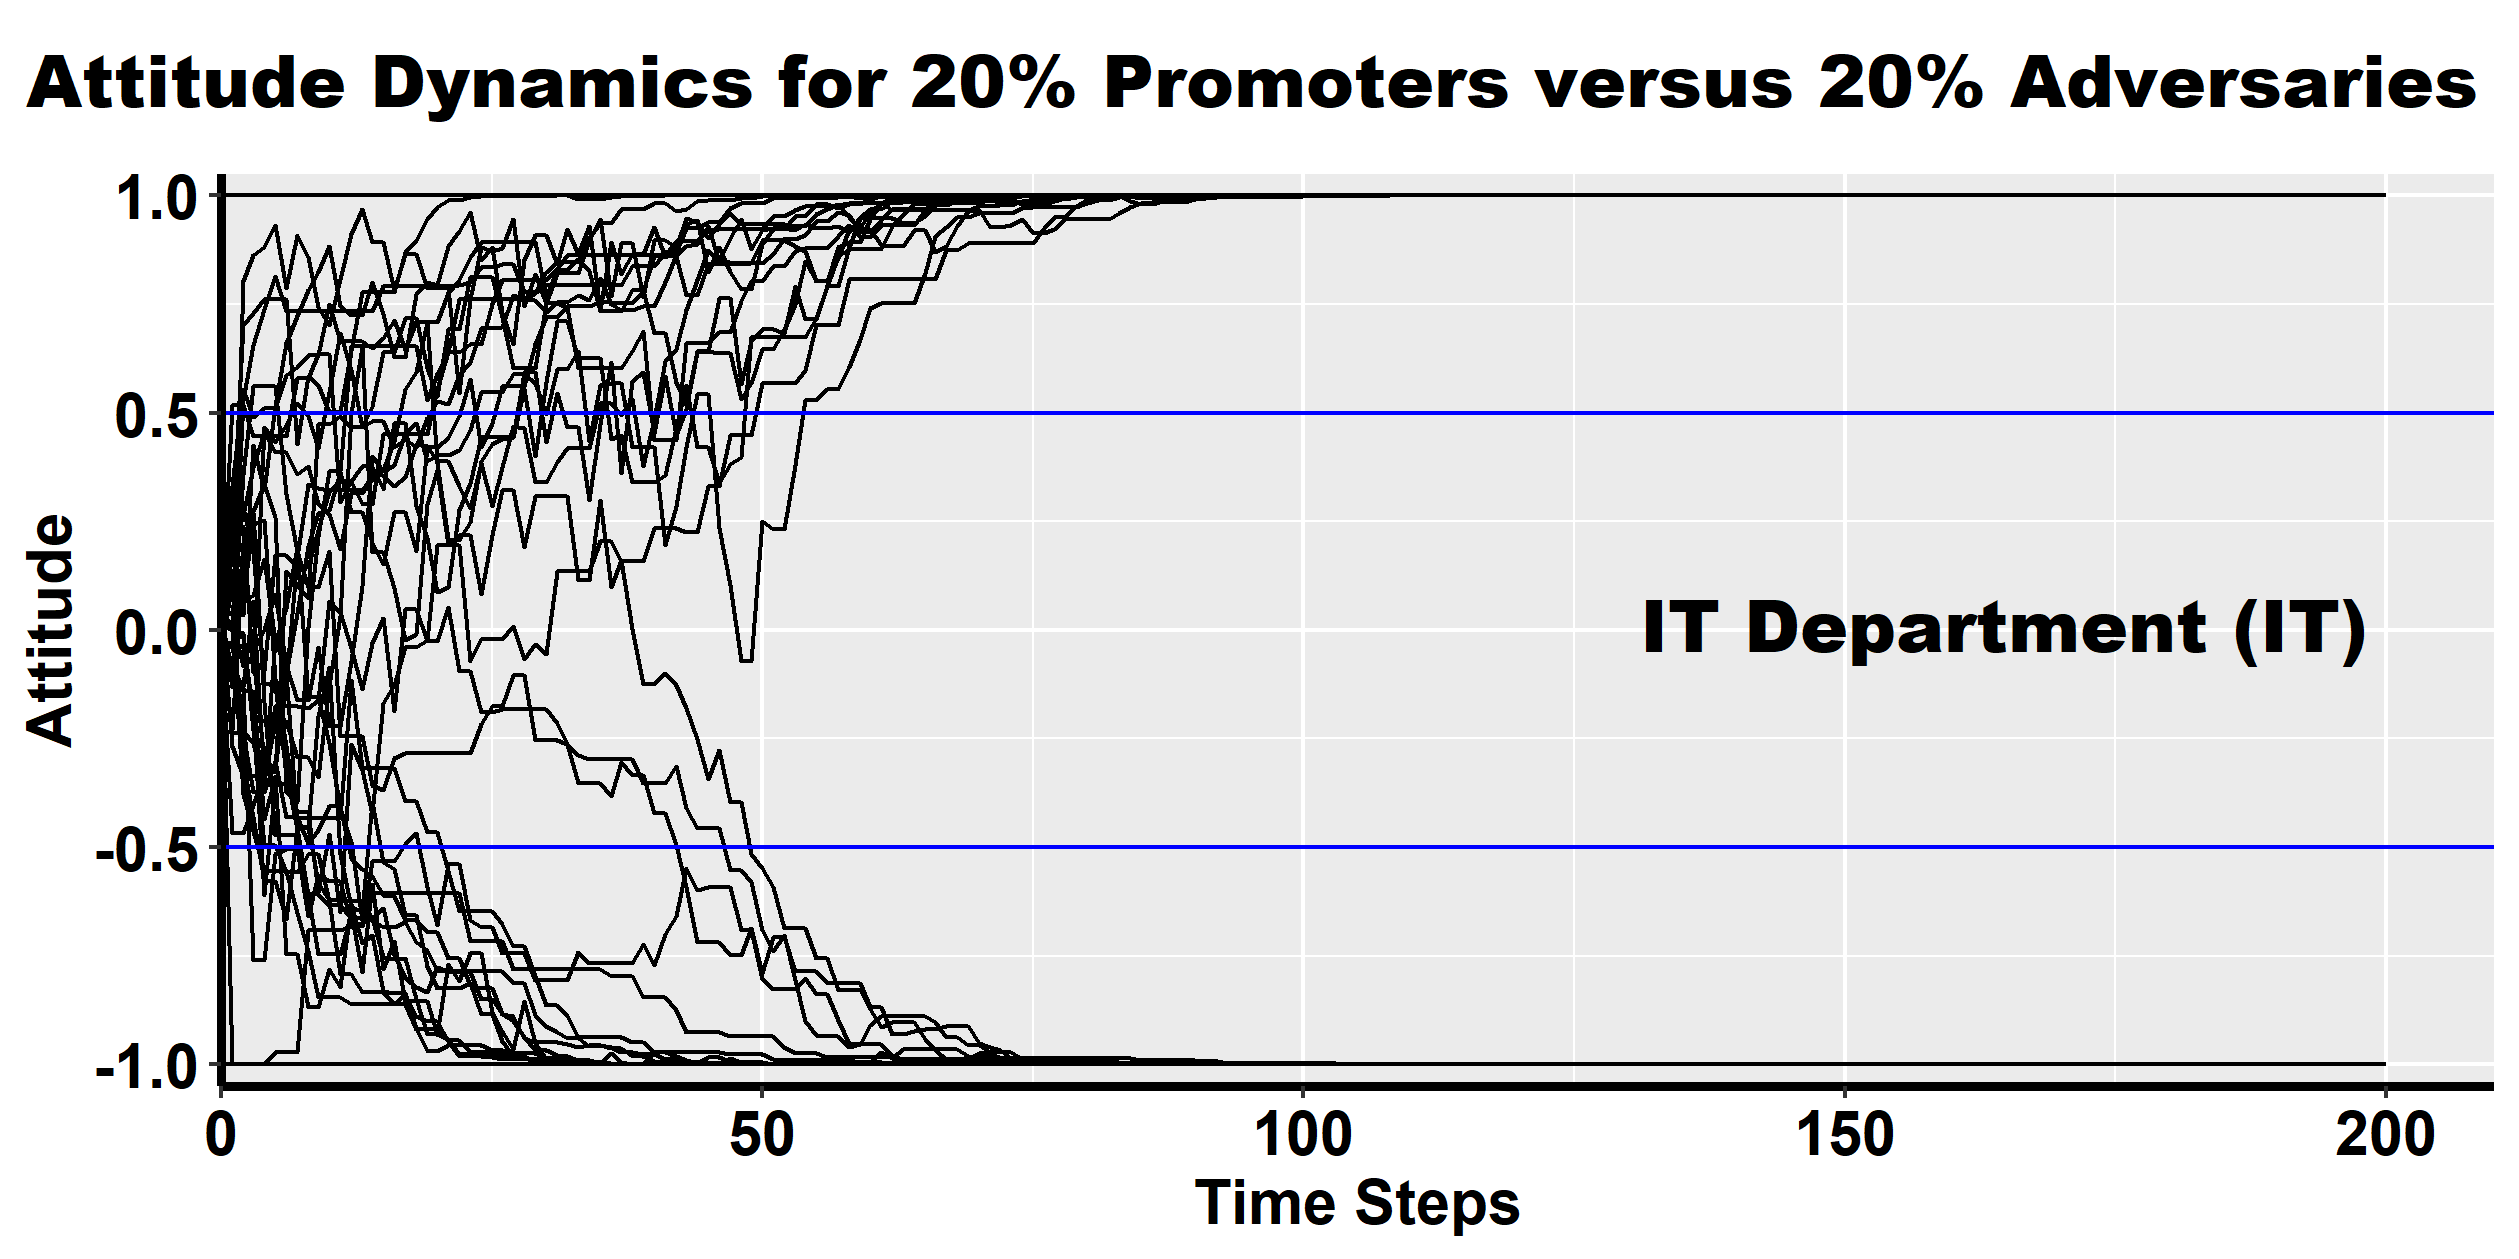

Supplement: s1 [file s1 › supplementary/SM V (Figures for 20% vs 20% and 25% vs 25%)/20% vs 20%/AD (20% vs 20%).png]

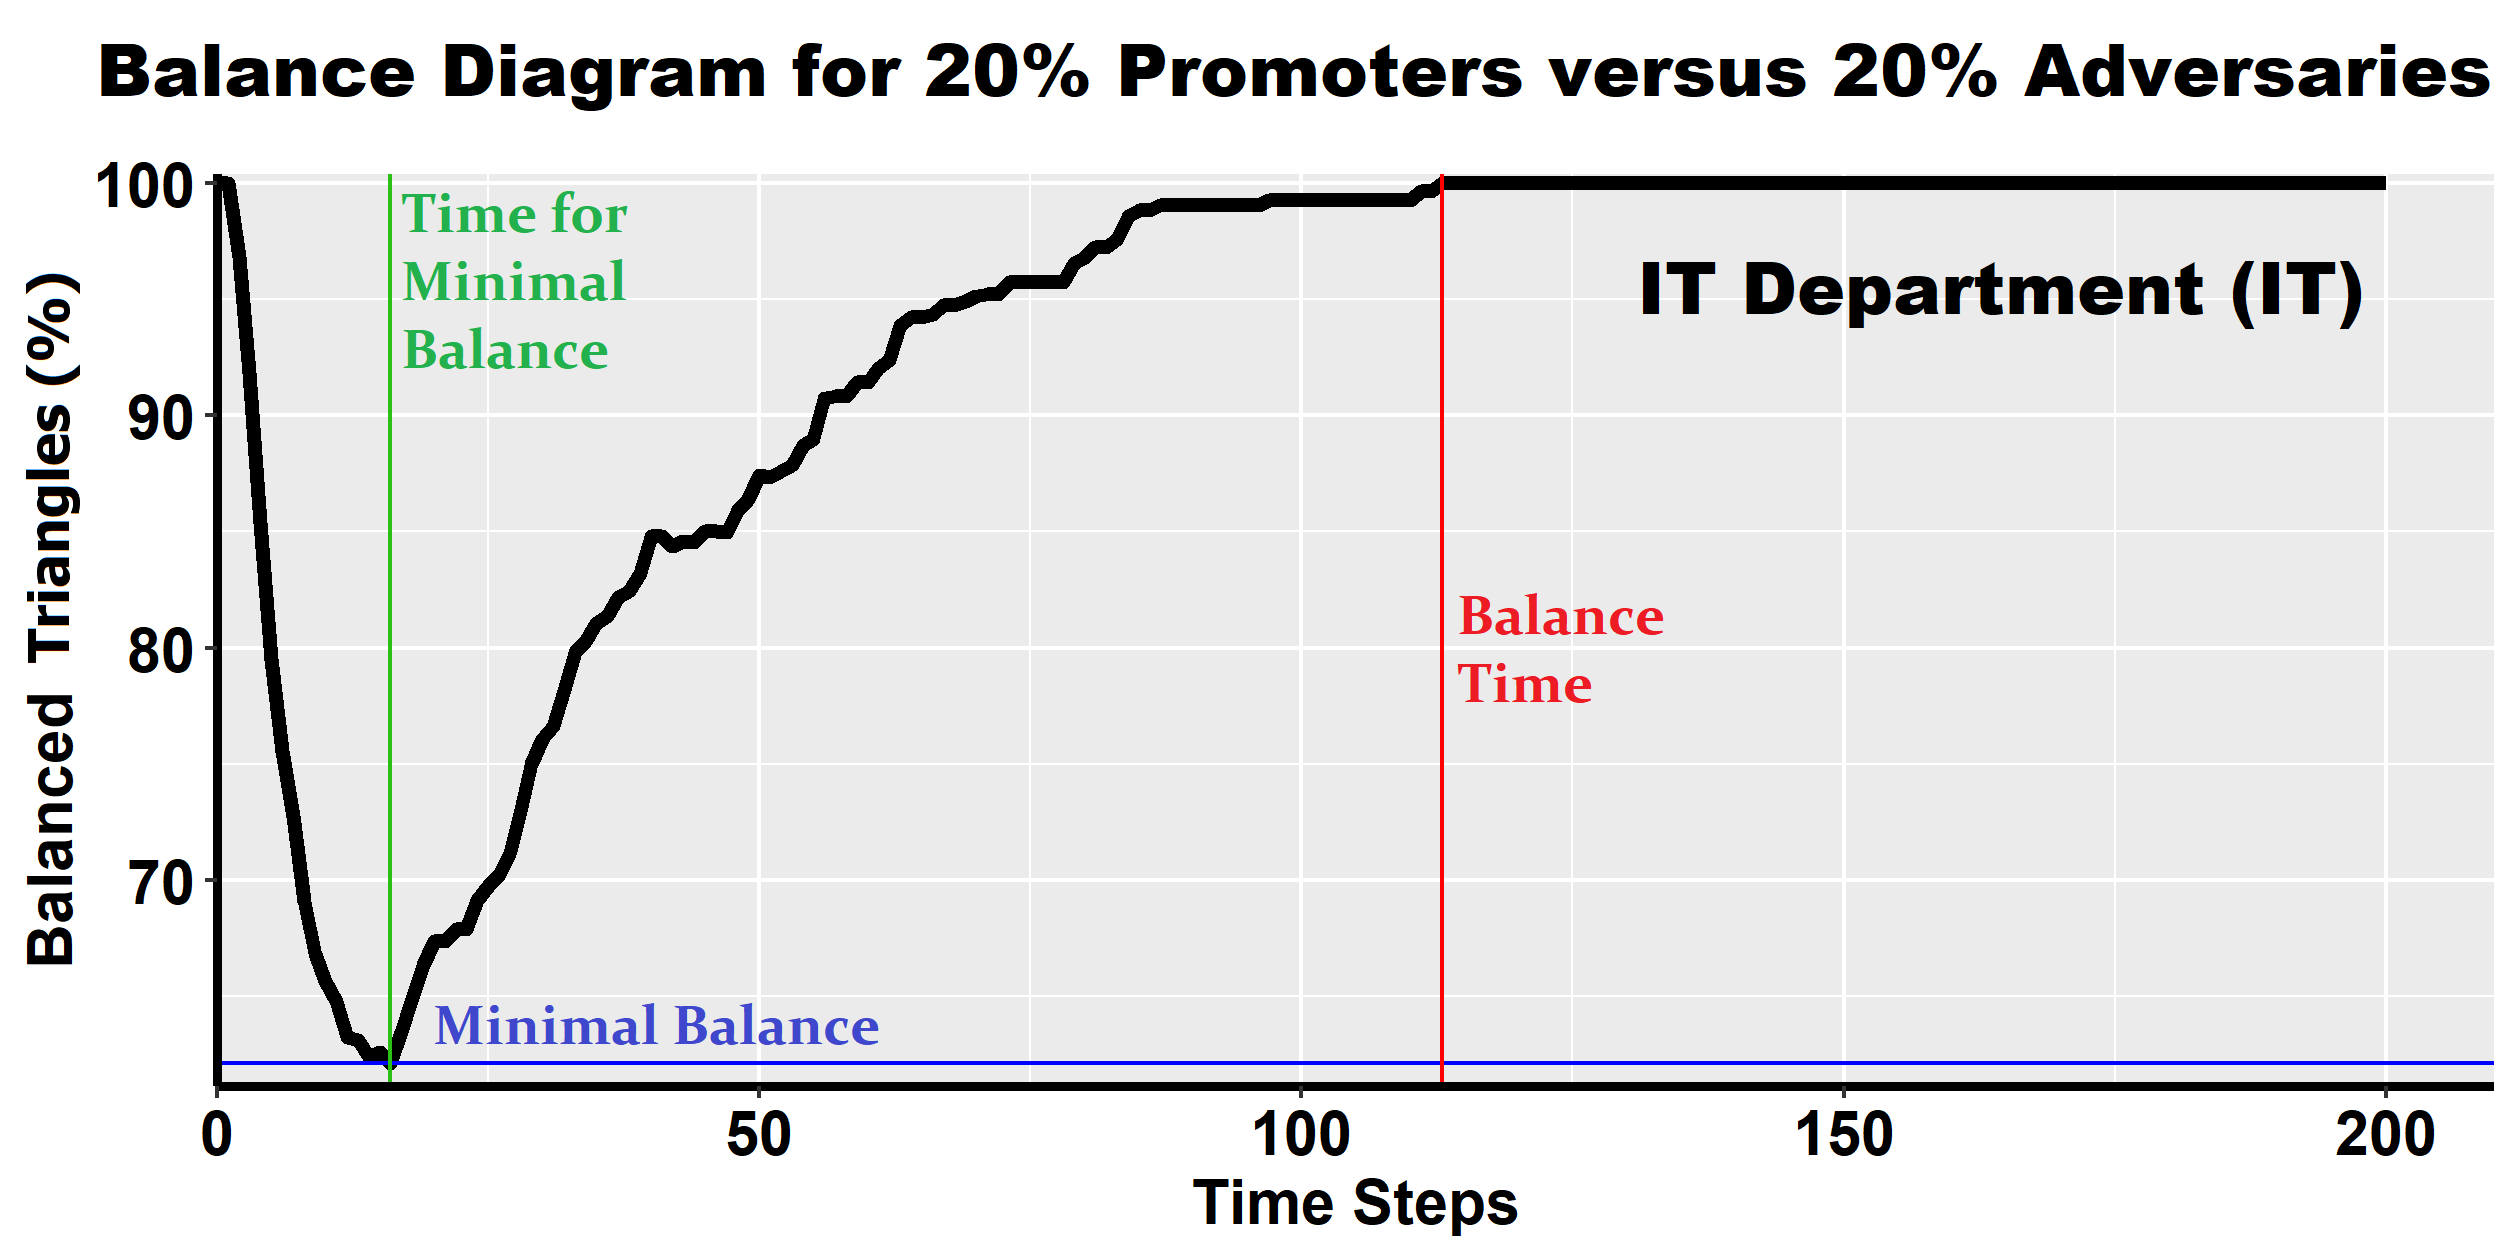

Supplement: s1 [file s1 › supplementary/SM V (Figures for 20% vs 20% and 25% vs 25%)/20% vs 20%/BD (20% vs 20%).png]

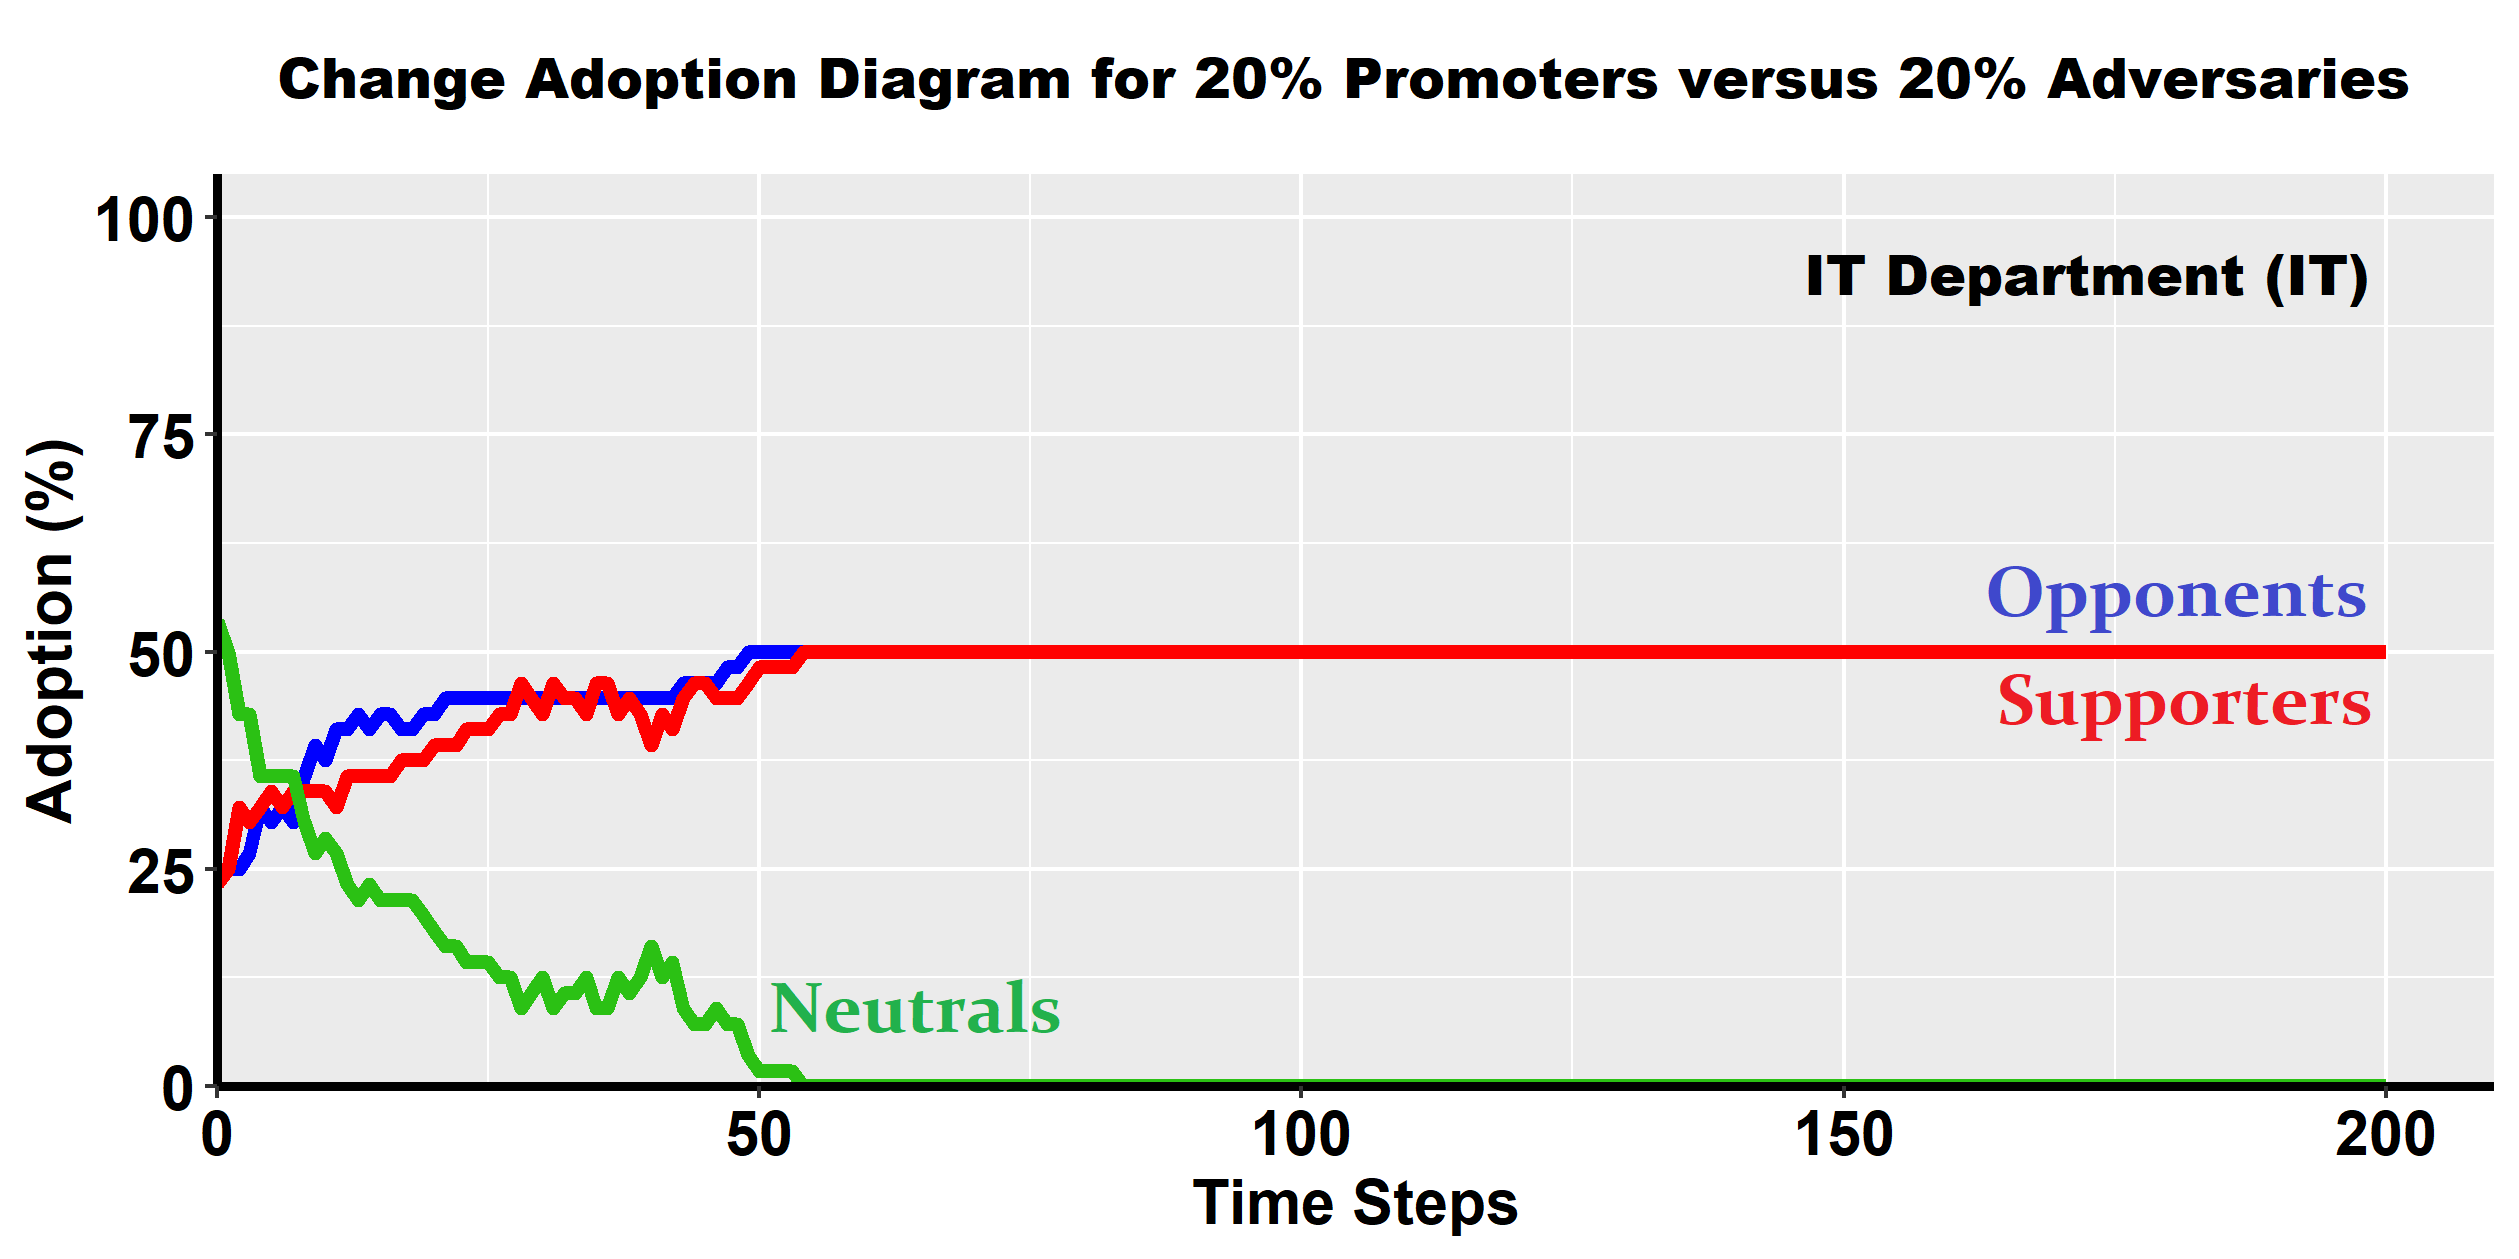

Supplement: s1 [file s1 › supplementary/SM V (Figures for 20% vs 20% and 25% vs 25%)/20% vs 20%/CAD (20% vs 20%).png]

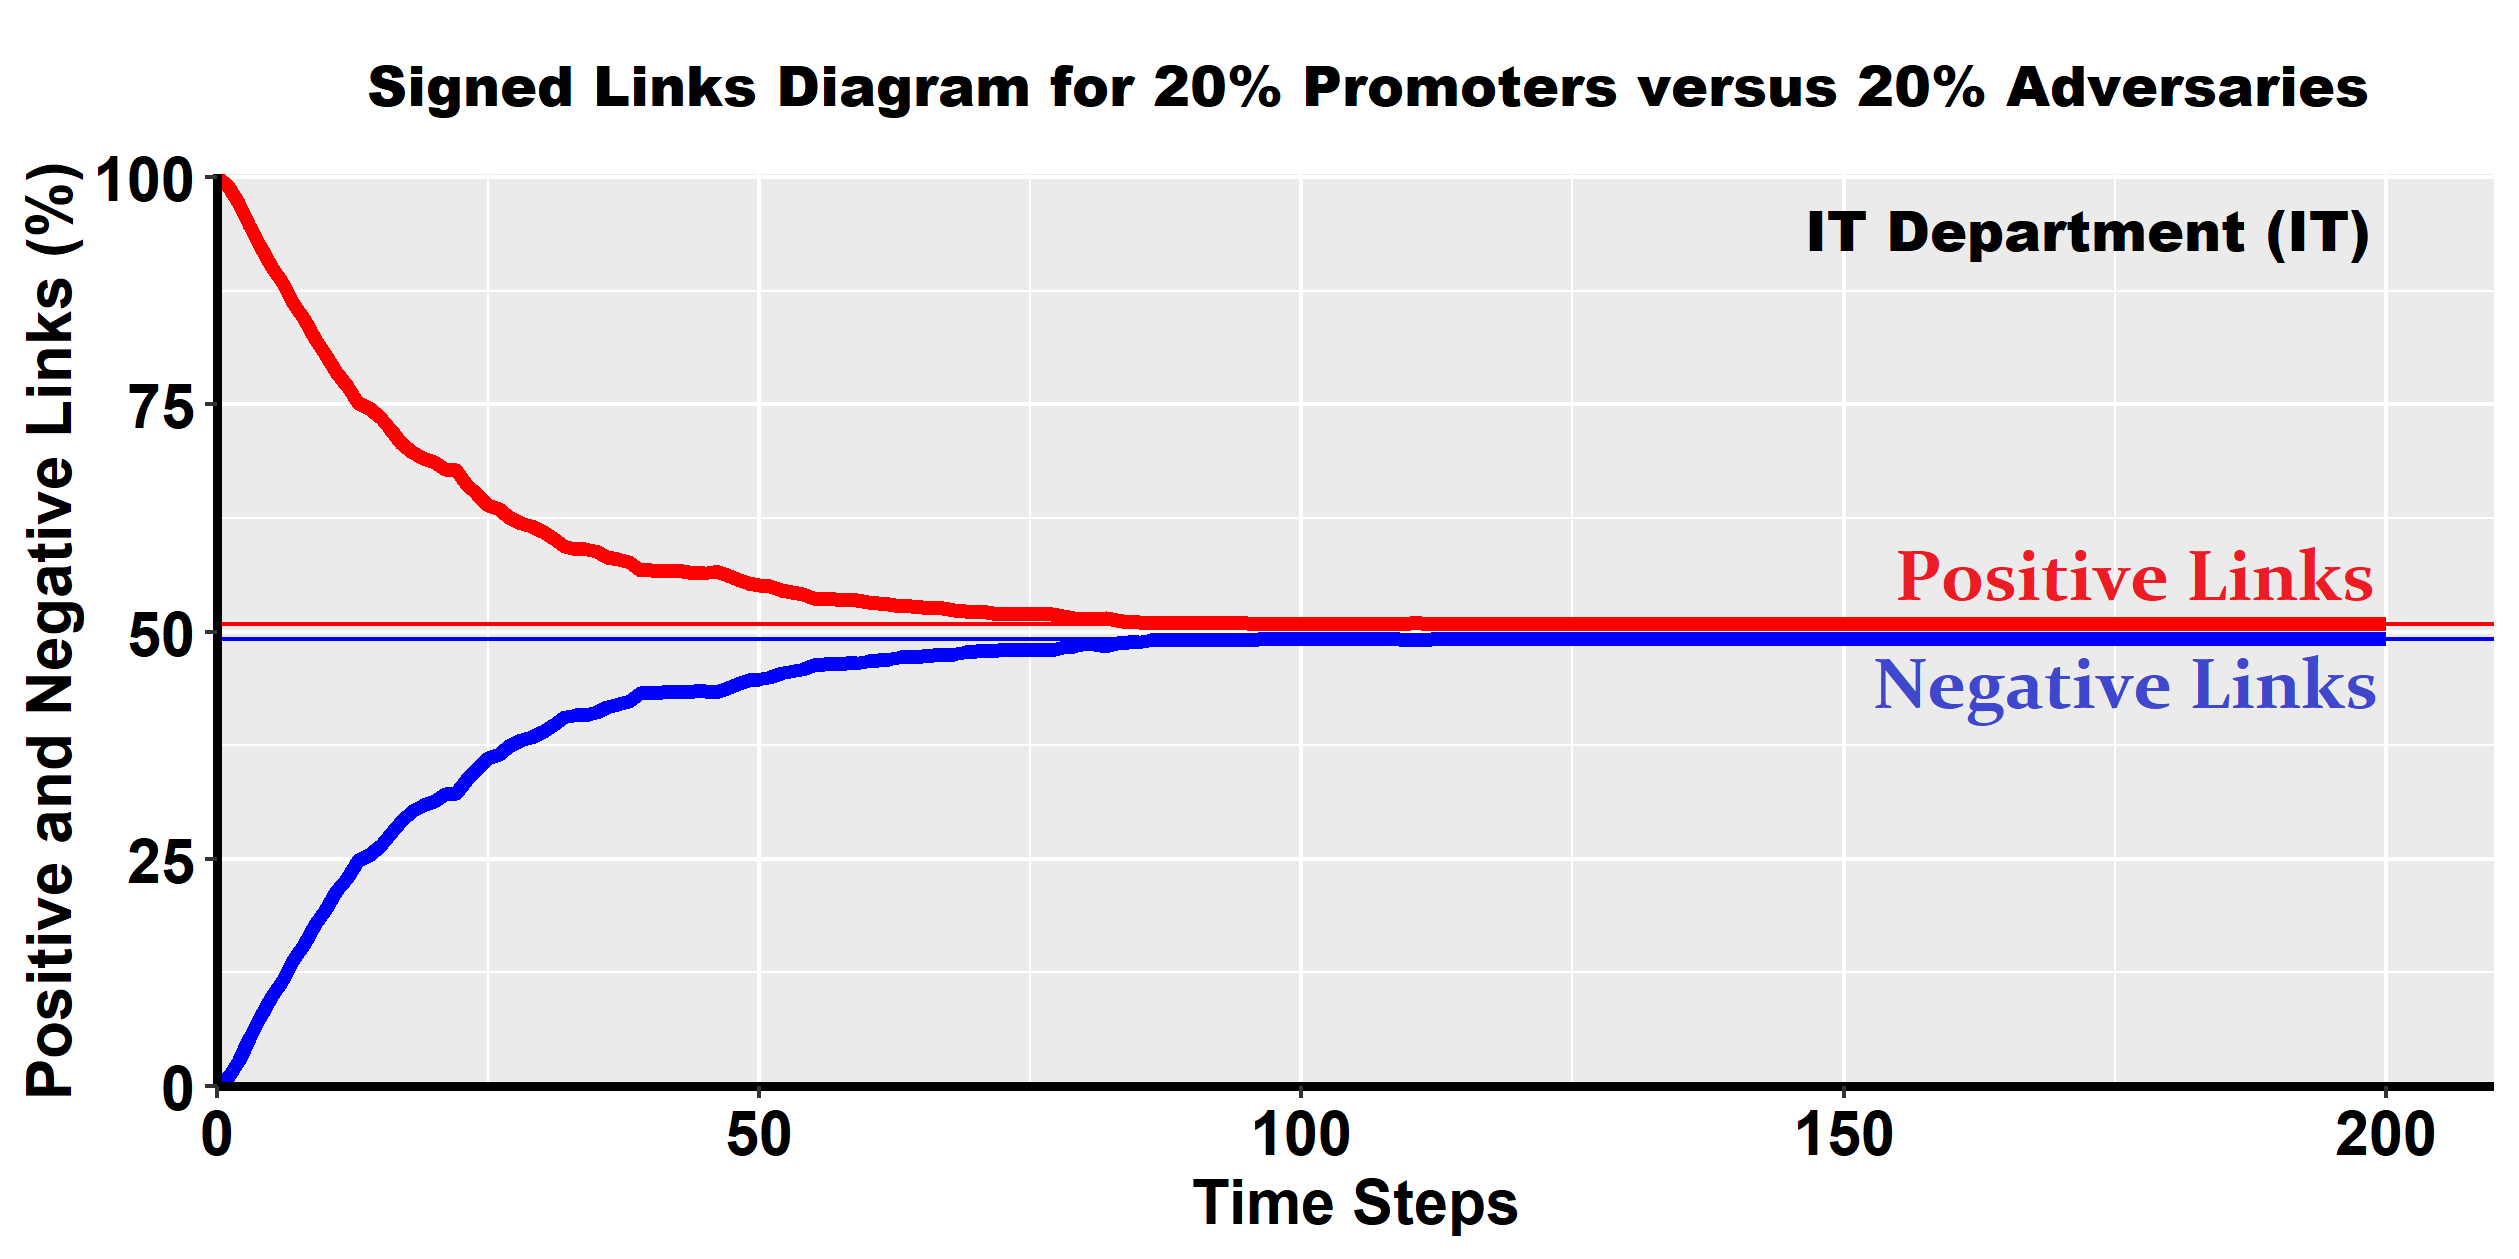

Supplement: s1 [file s1 › supplementary/SM V (Figures for 20% vs 20% and 25% vs 25%)/20% vs 20%/SLD (20% vs 20%).png]

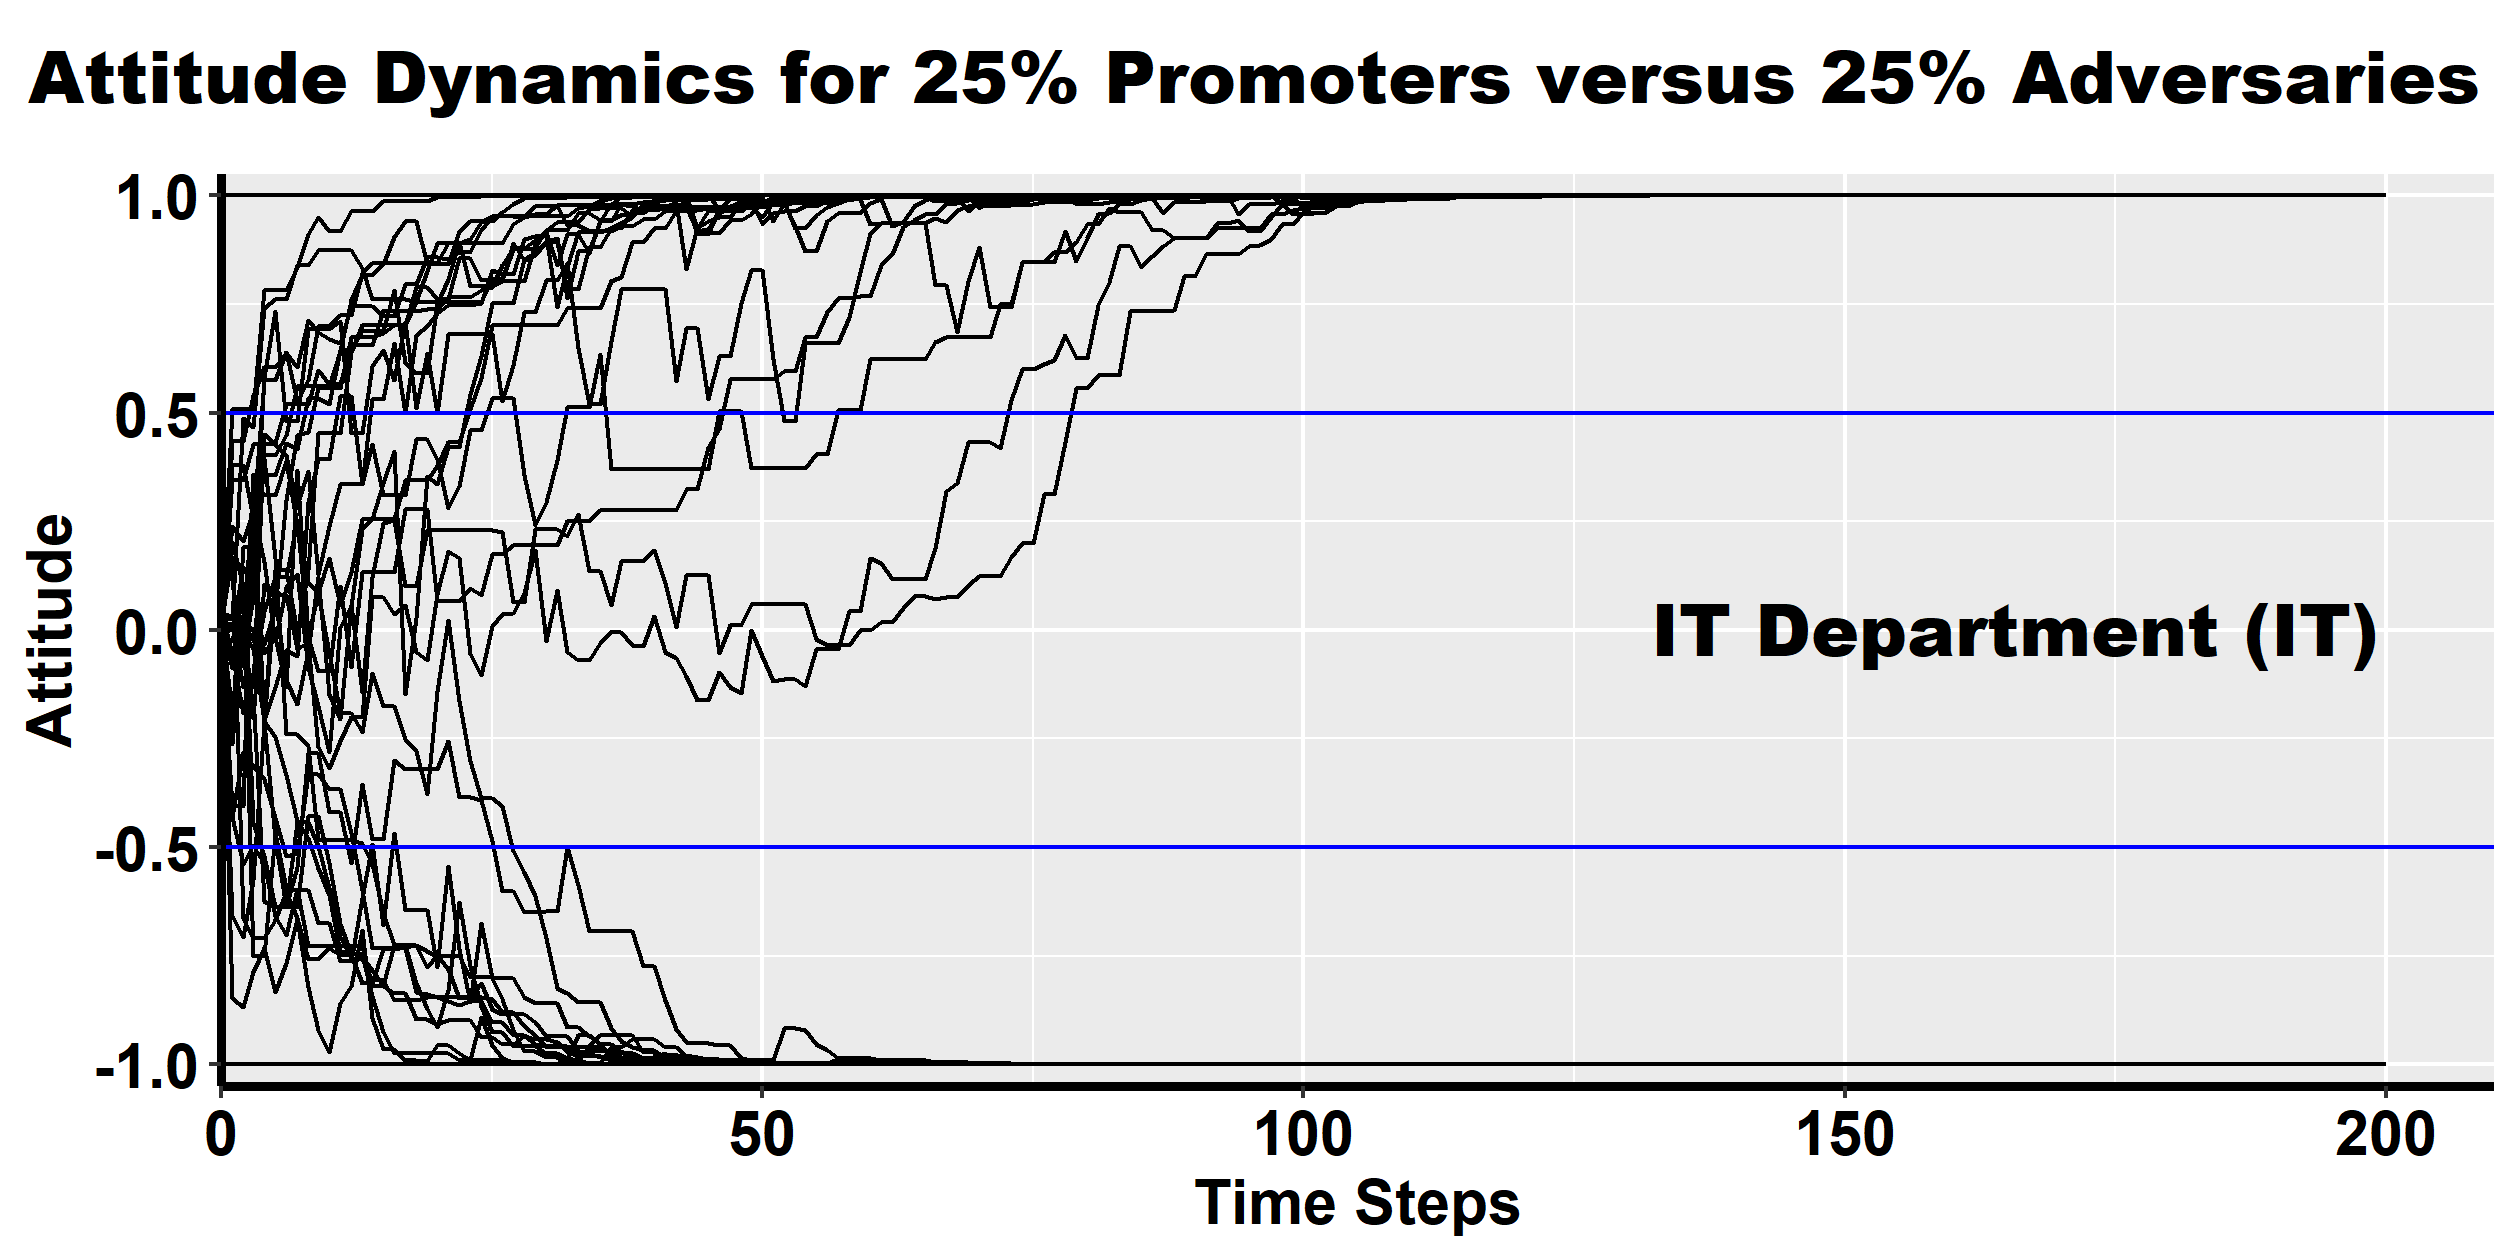

Supplement: s1 [file s1 › supplementary/SM V (Figures for 20% vs 20% and 25% vs 25%)/25% vs 25%/AD (25% vs 25%).png]

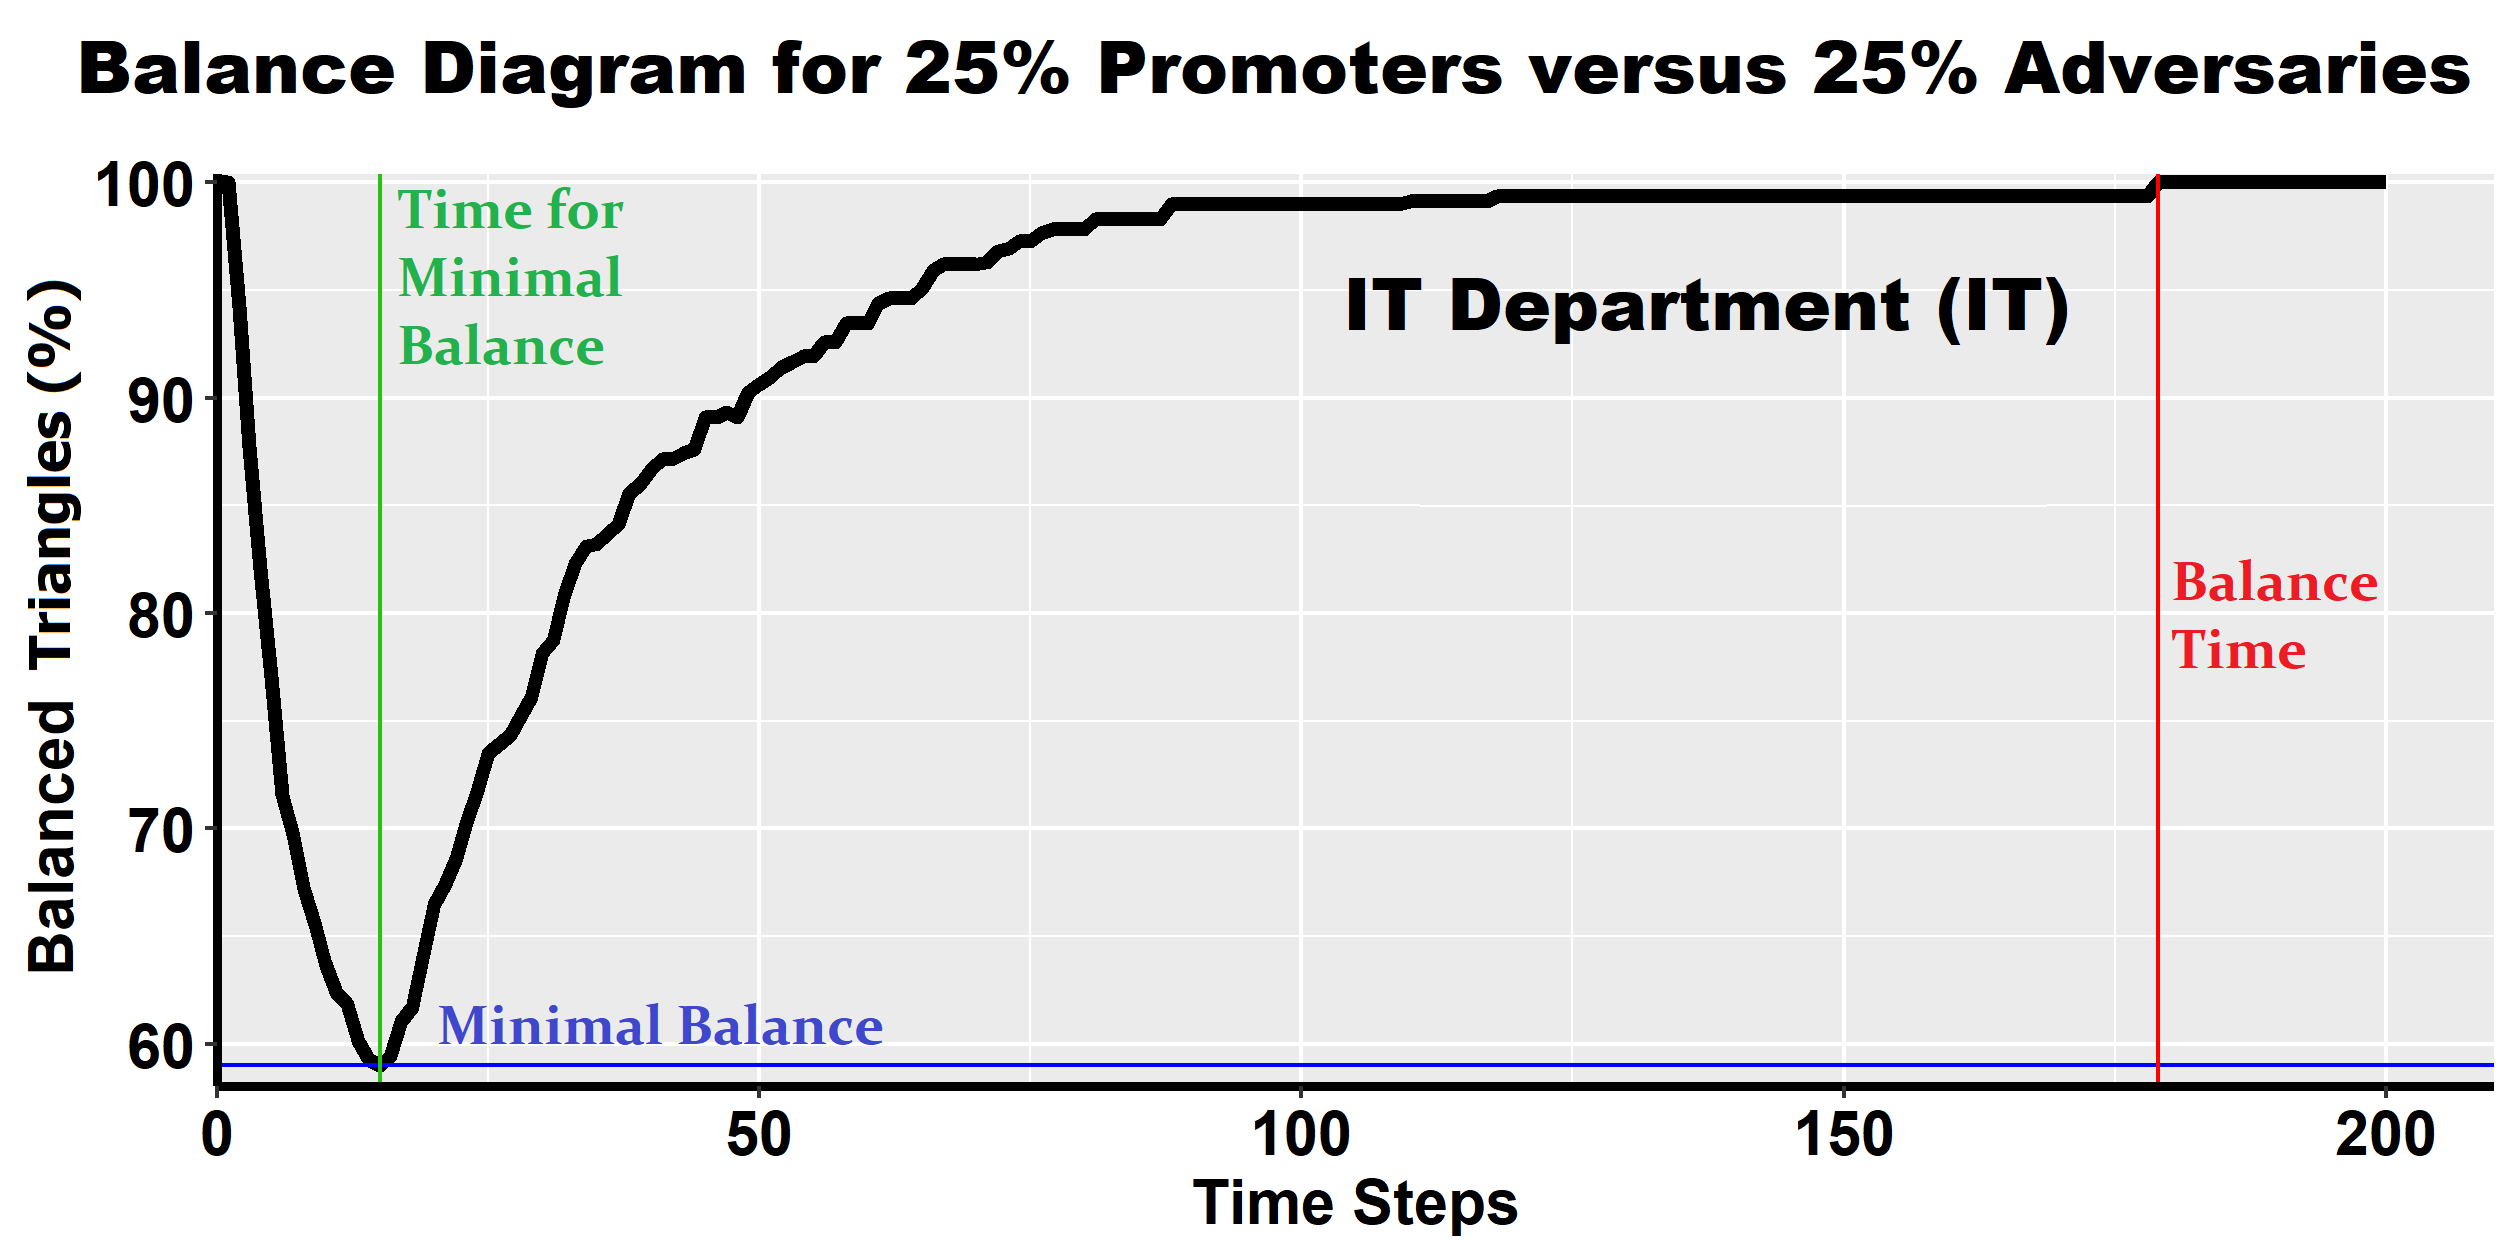

Supplement: s1 [file s1 › supplementary/SM V (Figures for 20% vs 20% and 25% vs 25%)/25% vs 25%/BD (25% vs 25%).png]

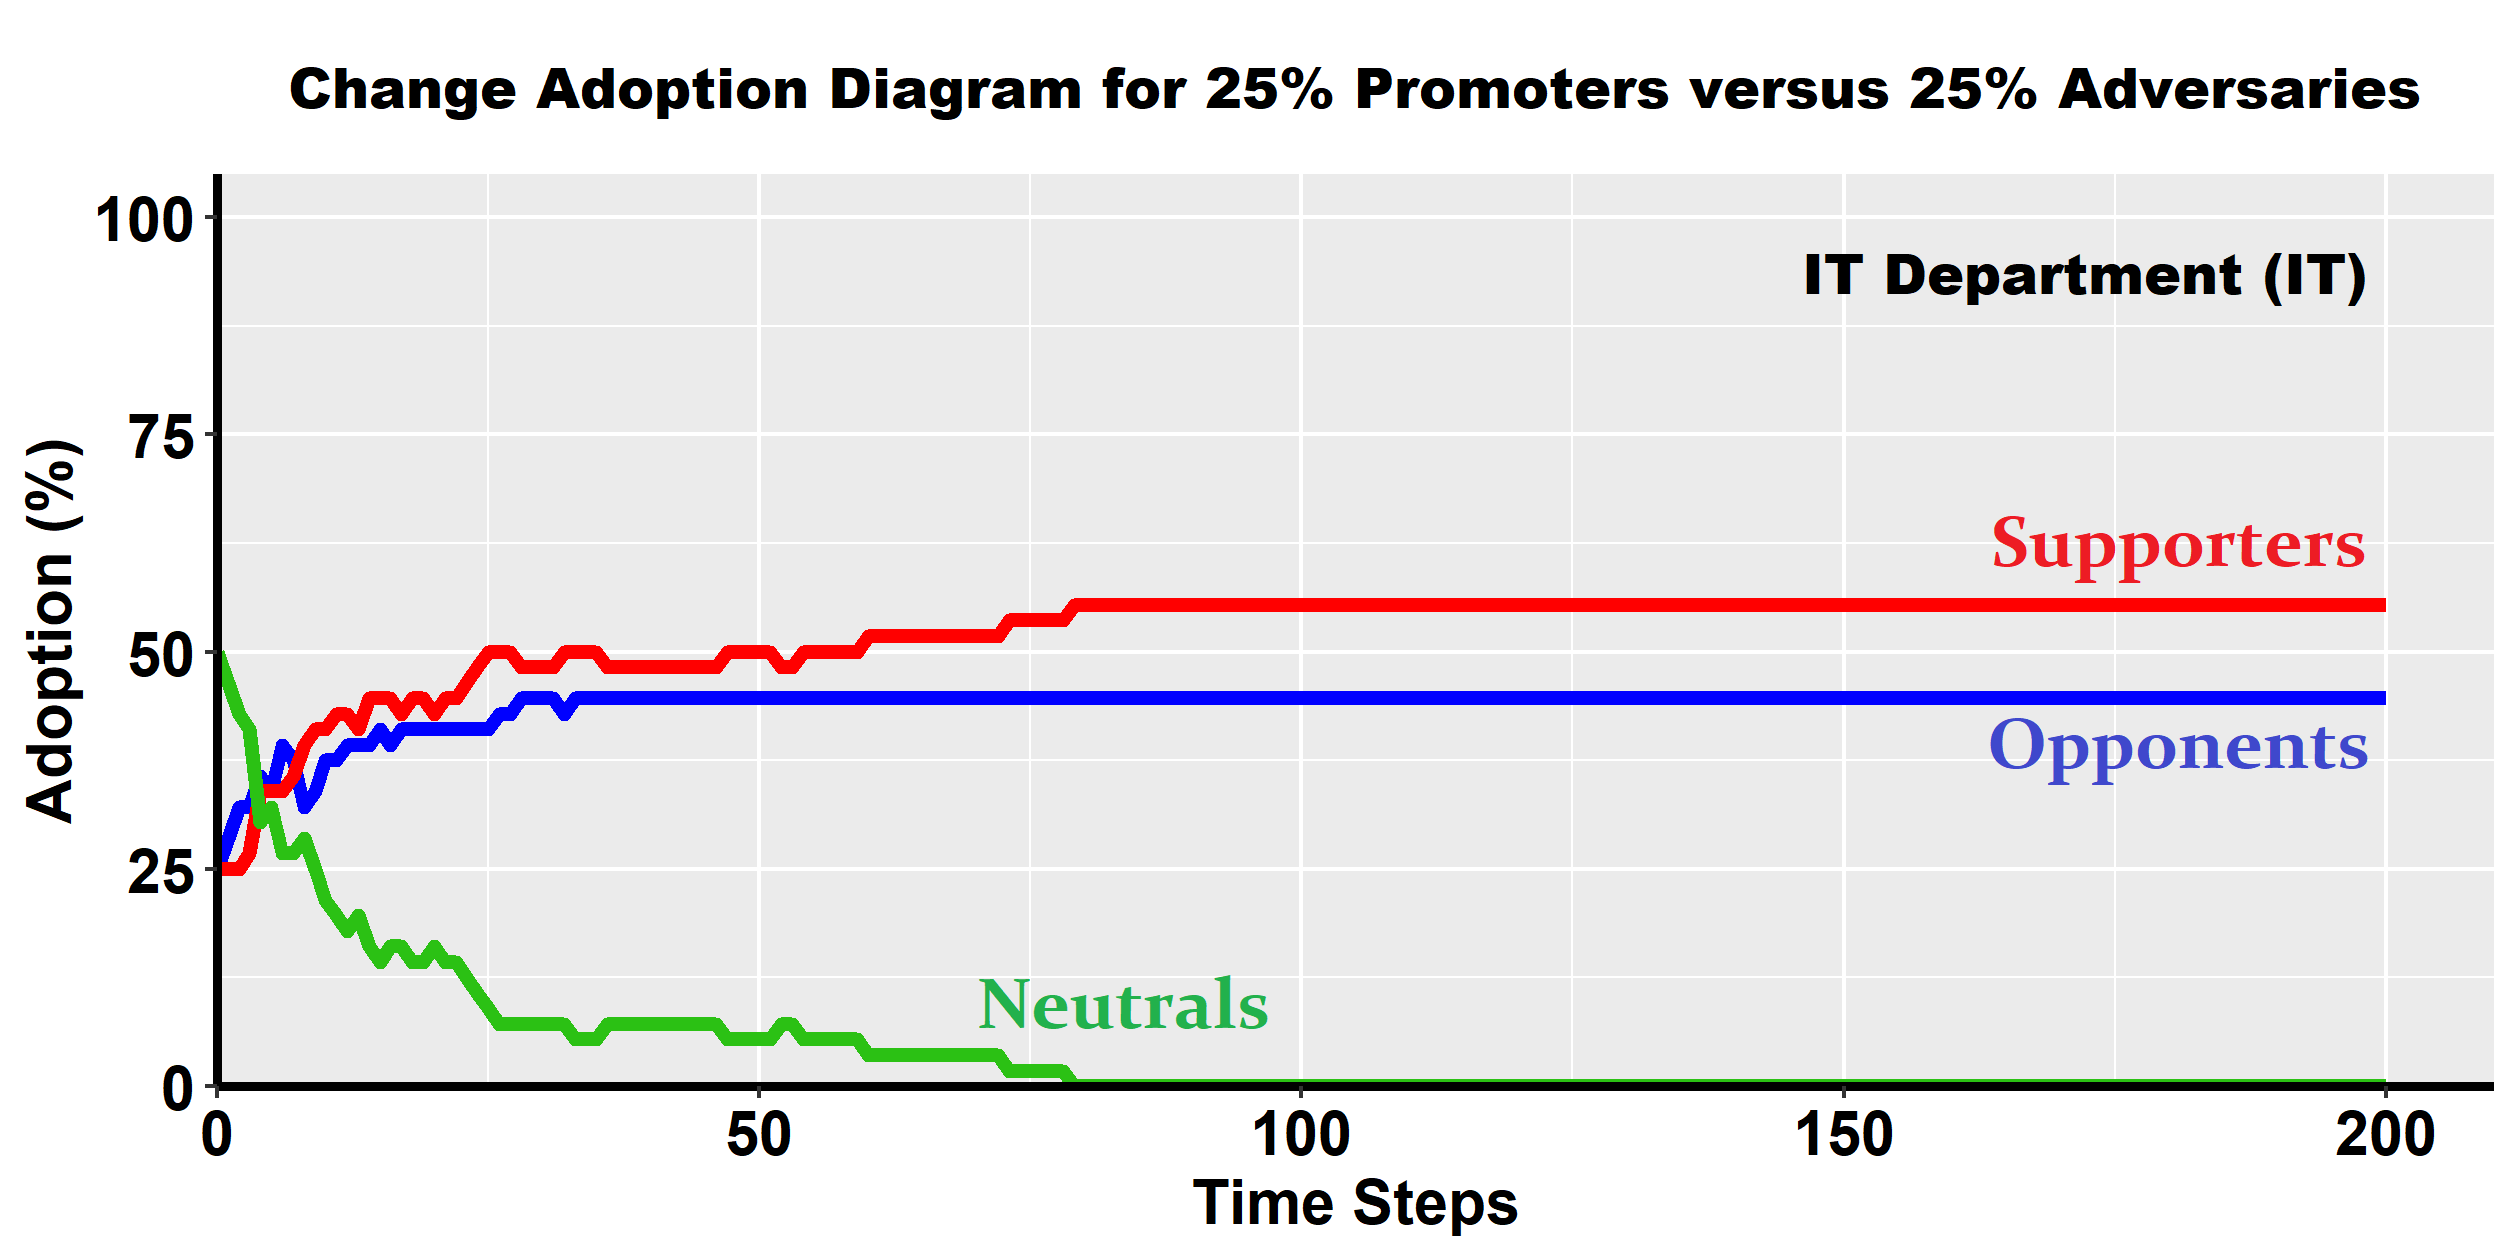

Supplement: s1 [file s1 › supplementary/SM V (Figures for 20% vs 20% and 25% vs 25%)/25% vs 25%/CAD (25% vs 25%).png]

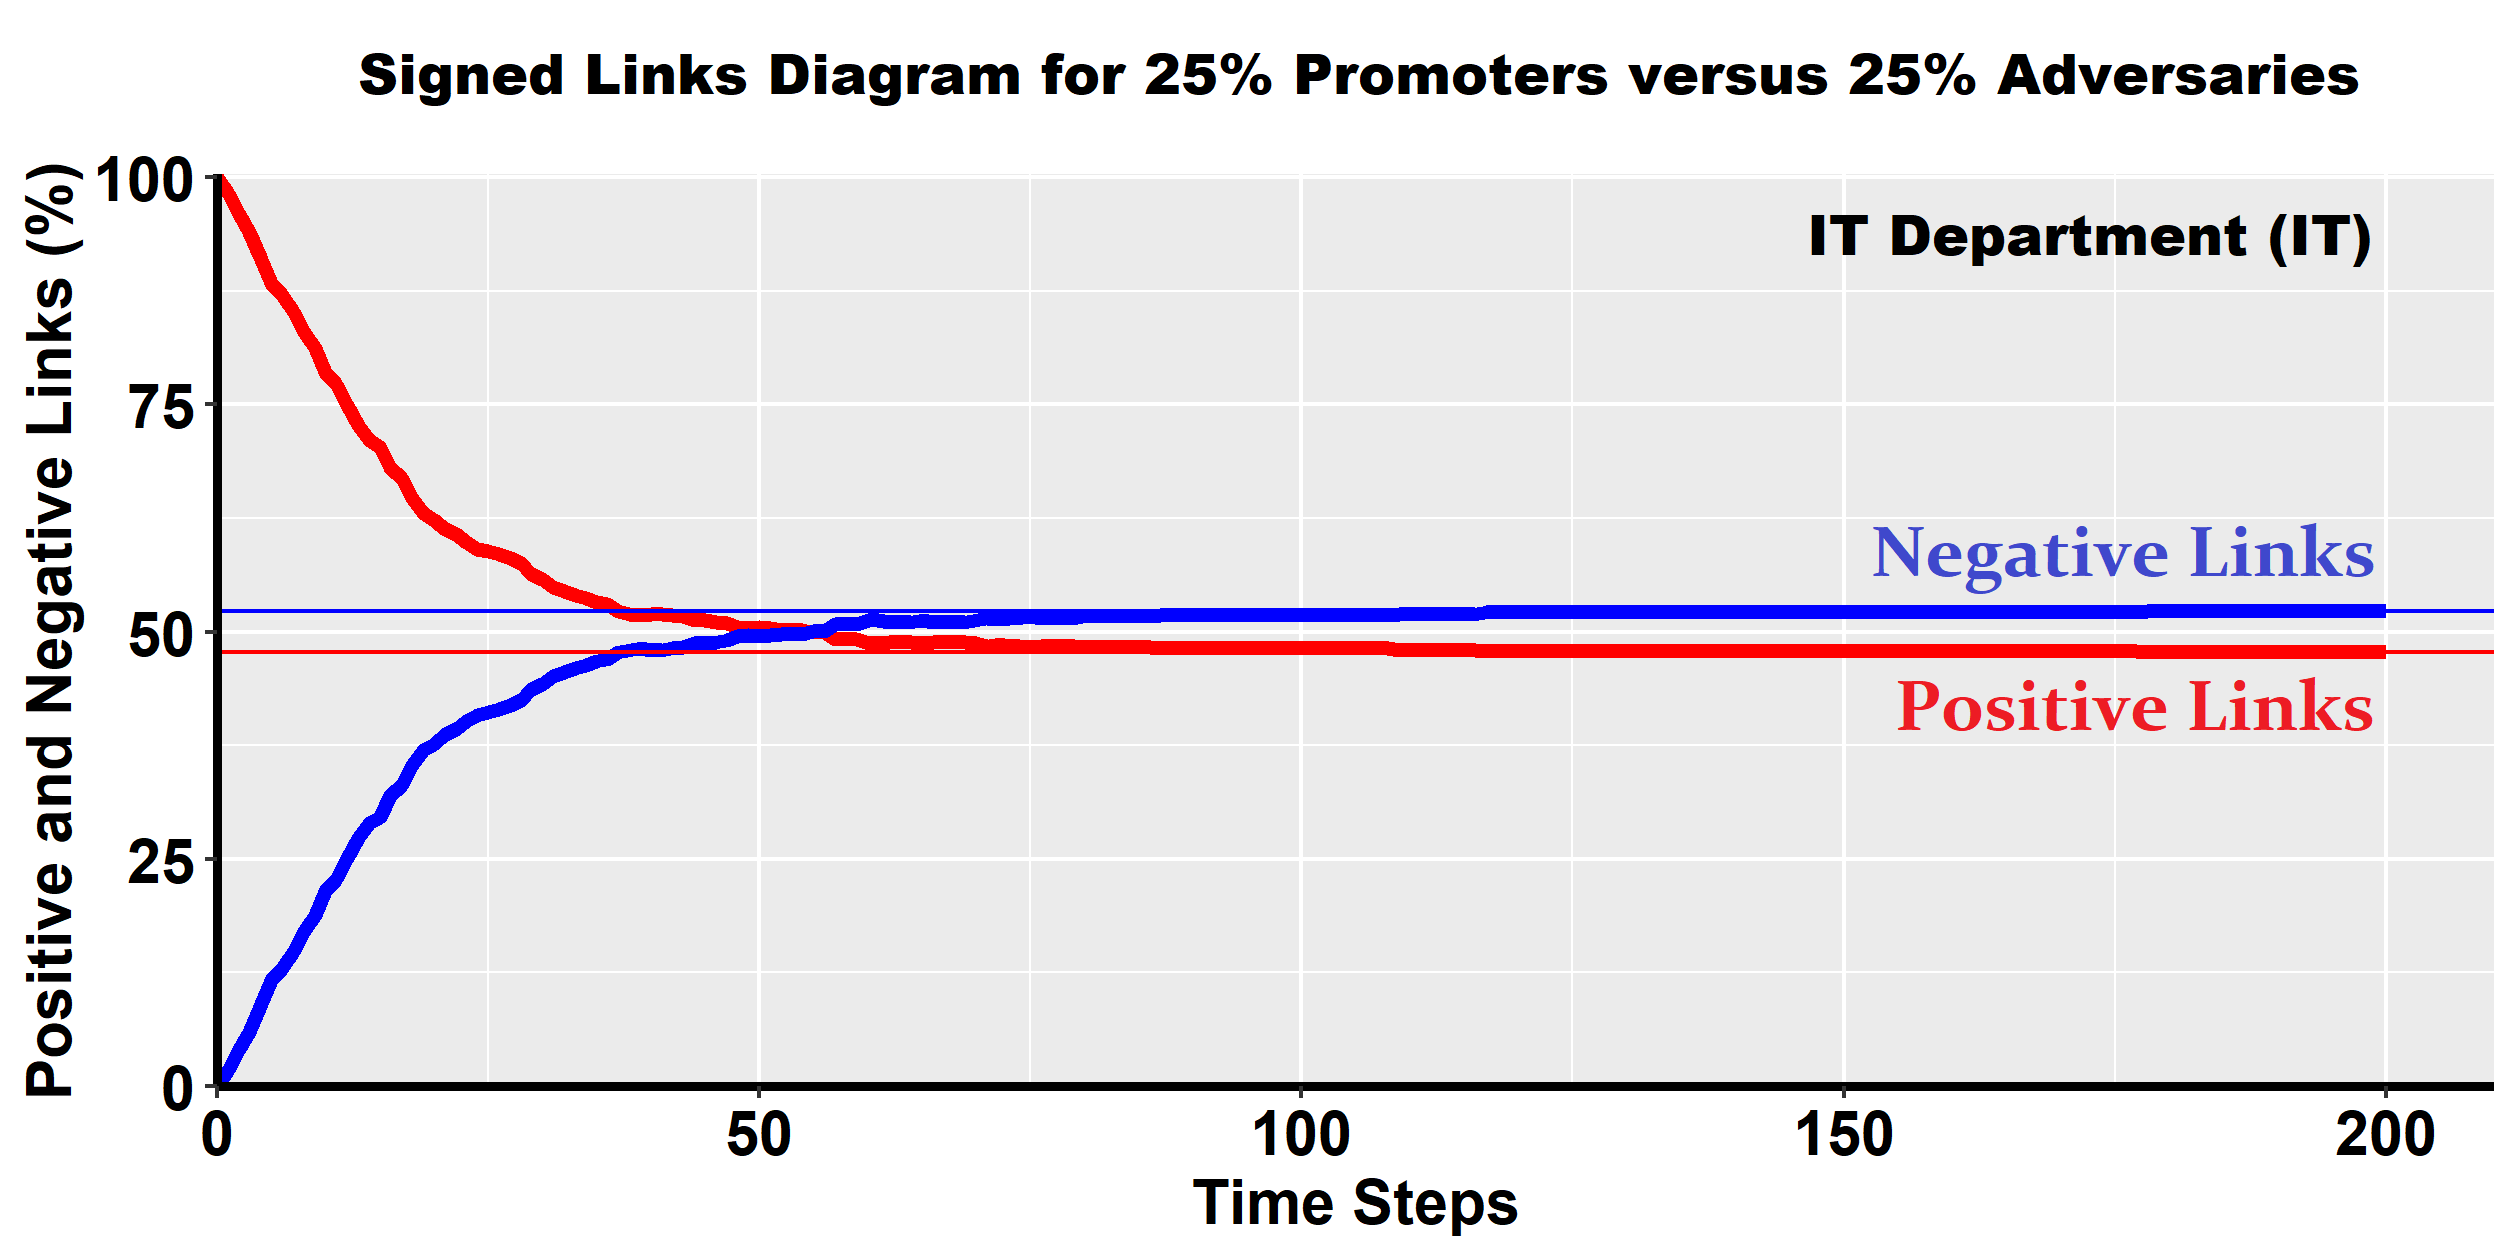

Supplement: s1 [file s1 › supplementary/SM V (Figures for 20% vs 20% and 25% vs 25%)/25% vs 25%/SLD (25% vs 25%).png]
